# Supplementary material for: Exploring gut microbiota in adult Atlantic salmon (Salmo salar L.): Associations with gut health and dietary prebiotics
Source: Anim Microbiome. 2023 Oct 3;5:47. doi: 10.1186/s42523-023-00269-1 (PMC10548677; doi:10.1186/s42523-023-00269-1)
Supplement: Supplementary file 3 — Supplementary Material 3 [file 42523_2023_269_MOESM3_ESM.xlsx]

## Sheet: Relative abundance
Table S2: Relative abundance of all ASVs for each sample
Sample ID	538	539	549	550	551	561	562	563	544	545	555	556	557	567	568	569	738	749	752	739	753	761	762	764	744	755	756	745	757	768	771	772	841	852	853	842	854	864	865	866	847	858	859	848	860	870	871	872
Life stage_dietary treatment	Jan_Ref	Jan_Ref	Jan_Ref	Jan_Ref	Jan_Ref	Jan_Ref	Jan_Ref	Jan_Ref	Jan_Test	Jan_Test	Jan_Test	Jan_Test	Jan_Test	Jan_Test	Jan_Test	Jan_Test	Apr_Ref	Apr_Ref	Apr_Ref	Apr_Ref	Apr_Ref	Apr_Ref	Apr_Ref	Apr_Ref	Apr_Test	Apr_Test	Apr_Test	Apr_Test	Apr_Test	Apr_Test	Apr_Test	Apr_Test	Sep_Ref	Sep_Ref	Sep_Ref	Sep_Ref	Sep_Ref	Sep_Ref	Sep_Ref	Sep_Ref	Sep_Test	Sep_Test	Sep_Test	Sep_Test	Sep_Test	Sep_Test	Sep_Test	Sep_Test
Phylum;Class;Order;Family;Genus;Species
D_0__Bacteria;D_1__Acidobacteria;D_2__Acidobacteriia;D_3__Solibacterales;D_4__Solibacteraceae (Subgroup 3);D_5__Bryobacter	0	0	0.0357974	0	0	0	0	0	0	0	0	0	0	0	0	0	0	0	0	0	0	0	0	0	0	0	0	0	0	0	0	0	0	0	0	0	0	0	0	0	0	0	0	0	0	0	0	0
D_0__Bacteria;D_1__Acidobacteria;D_2__Acidobacteriia;D_3__Solibacterales;D_4__Solibacteraceae (Subgroup 3);D_5__Paludibaculum	0	0	0	0	0	0	0	0	0	0	0	0	0	0	0	0	0	0	0	0	0	0	0	0	0	0	0	0	0	0	0	0	0	0	0	0	0	0	0	0	0	0	0	0	0	0	0	0
D_0__Bacteria;D_1__Acidobacteria;D_2__Blastocatellia (Subgroup 4);D_3__11-24;D_4__uncultured bacterium;D_5__uncultured bacterium	0	0	0	0	0	0	0	0	0	0	0	0	0	0	0	0	0	0	0	0	0	0	0	0	0	0	0	0	0	0	0	0	0	0	0	0	0	0	0	0	0	0	0	0	0	0	0	0
D_0__Bacteria;D_1__Acidobacteria;D_2__Blastocatellia (Subgroup 4);D_3__Blastocatellales;D_4__Blastocatellaceae;D_5__Blastocatella	0.0063861	0	0	0	0	0	0	0	0	0	0	0	0	0	0	0	0	0	0	0	0	0	0	0	0	0	0	0	0	0	0	0	0	0	0	0	0	0	0	0	0	0	0	0	0	0	0	0
D_0__Bacteria;D_1__Acidobacteria;D_2__Blastocatellia (Subgroup 4);D_3__Blastocatellales;D_4__Blastocatellaceae;D_5__JGI 0001001-H03	0	0	0	0	0	0	0	0	0	0	0	0	0	0	0	0	0	0	0	0.00290228	0	0	0	0	0	0	0	0	0	0	0	0	0	0	0	0	0	0	0	0	0	0	0	0	0	0	0	0
D_0__Bacteria;D_1__Acidobacteria;D_2__Subgroup 6;__;__;__	0	0	0	0	0	0	0	0.0204195	0	0	0	0	0	0	0	0	0	0	0	0	0	0	0	0	0	0	0	0	0	0	0	0	0	0	0	0	0	0	0	0	0	0	0	0	0	0	0	0.011622
D_0__Bacteria;D_1__Actinobacteria;D_2__Acidimicrobiia;D_3__Actinomarinales;D_4__Actinomarinaceae;D_5__Candidatus Actinomarina	0	0	0	0	0	0	0	0	0	0.0404906	0	0	0	0	0.00608606	0	0	0	0	0	0	0	0	0	0	0	0	0	0	0	0	0	0	0	0	0.00407988	0	0	0	0	0	0	0	0	0	0	0	0.0203385
D_0__Bacteria;D_1__Actinobacteria;D_2__Acidimicrobiia;D_3__IMCC26256;D_4__metagenome;D_5__metagenome	0	0	0	0	0	0	0	0	0	0	0	0	0	0	0	0	0	0	0	0	0	0	0	0	0	0	0	0	0	0	0	0	0	0	0	0	0	0	0	0	0	0	0	0	0	0	0	0
D_0__Bacteria;D_1__Actinobacteria;D_2__Acidimicrobiia;D_3__IMCC26256;__;__	0	0	0	0	0	0	0	0.00742528	0	0	0	0	0	0	0	0	0	0	0.0322364	0	0	0	0	0	0	0	0	0	0	0	0	0	0.00637397	0	0	0	0	0	0	0	0	0	0	0	0	0	0	0
D_0__Bacteria;D_1__Actinobacteria;D_2__Acidimicrobiia;D_3__Microtrichales;D_4__Iamiaceae;D_5__Iamia	0	0	0	0	0	0	0	0	0	0	0	0	0	0	0	0	0	0	0	0.0116091	0	0	0	0	0	0	0	0	0	0.01969	0	0.0120412	0	0	0	0	0	0	0	0	0	0.0104871	0	0	0	0	0	0
D_0__Bacteria;D_1__Actinobacteria;D_2__Acidimicrobiia;D_3__Microtrichales;D_4__Ilumatobacteraceae;D_5__CL500-29 marine group	0	0.00946539	0	0	0	0	0	0	0	0	0	0	0	0	0	0.0196533	0	0	0	0	0	0	0	0	0	0	0	0	0	0	0	0	0	0	0	0	0	0	0	0	0	0	0	0	0	0	0	0
D_0__Bacteria;D_1__Actinobacteria;D_2__Acidimicrobiia;D_3__Microtrichales;D_4__Ilumatobacteraceae;D_5__Ilumatobacter	0	0	0.0468775	0	0	0	0	0	0	0	0	0	0	0.0296663	0	0	0	0	0	0.00290228	0	0	0.00897324	0	0	0	0	0	0	0	0	0.030103	0.00509918	0	0	0	0	0	0	0	0	0	0	0	0	0	0	0
D_0__Bacteria;D_1__Actinobacteria;D_2__Acidimicrobiia;D_3__Microtrichales;D_4__Microtrichaceae;D_5__IMCC26207	0	0	0	0.0146757	0	0	0	0	0	0	0	0	0	0	0	0	0	0	0	0.00483713	0	0	0	0	0.0119886	0	0	0	0	0	0	0	0	0	0	0	0.0208368	0	0	0	0	0	0	0	0	0	0	0
D_0__Bacteria;D_1__Actinobacteria;D_2__Acidimicrobiia;D_3__Microtrichales;D_4__Microtrichaceae;D_5__Sva0996 marine group	0	0.00757232	0	0	0	0	0	0	0	0	0	0	0	0.00523524	0	0	0	0	0	0	0	0	0	0	0	0	0	0	0	0	0	0	0	0	0	0	0	0	0	0	0	0	0	0	0	0	0	0
D_0__Bacteria;D_1__Actinobacteria;D_2__Acidimicrobiia;D_3__Microtrichales;D_4__uncultured;__	0	0	0	0	0	0	0	0	0	0	0	0	0	0	0	0	0	0	0	0	0	0	0	0	0	0	0	0	0	0	0.0734371	0	0	0	0	0	0	0	0	0	0	0	0	0	0	0	0	0
D_0__Bacteria;D_1__Actinobacteria;D_2__Acidimicrobiia;D_3__uncultured;D_4__uncultured actinobacterium;D_5__uncultured actinobacterium	0	0	0	0	0	0	0	0	0	0	0	0	0	0	0	0	0	0	0	0	0	0	0	0	0	0	0	0	0	0	0	0	0	0	0	0	0	0	0	0	0	0	0	0	0	0	0	0
D_0__Bacteria;D_1__Actinobacteria;D_2__Actinobacteria;D_3__Actinomycetales;D_4__Actinomycetaceae;D_5__Actinomyces	0	0	0	0.0110068	0	0	0	0	0	0	0	0	0	0	0	0	0.0155702	0	0.0261376	0	0	0	0	0	0	0.0340062	0	0	0	0	0	0	0	0	0	0	0	0	0	0	0	0	0	0	0	0	0.00306902	0
D_0__Bacteria;D_1__Actinobacteria;D_2__Actinobacteria;D_3__Bifidobacteriales;D_4__Bifidobacteriaceae;D_5__Bifidobacterium	0.0191583	0.0293427	0	0	0.153146	0.0177582	0.0156607	0.0891034	0.110605	0.00989769	0.0702415	0.0252049	0.0542064	0.0383917	0.0681638	0.011792	0.0325558	0	0	0	0	0	0	0	0	0.035552	0	0	0	0	0	0.058199	0	0	0	0	0	0	0	0	0	0	0	0	0	0	0	0
D_0__Bacteria;D_1__Actinobacteria;D_2__Actinobacteria;D_3__Corynebacteriales;D_4__Corynebacteriaceae;Ambiguous_taxa	0	0	0	0	0	0	0	0	0	0	0	0	0	0	0	0	0	0	0	0	0	0	0	0	0	0	0	0	0	0	0	0	0	0	0	0	0	0	0	0	0	0	0	0	0	0	0	0
D_0__Bacteria;D_1__Actinobacteria;D_2__Actinobacteria;D_3__Corynebacteriales;D_4__Corynebacteriaceae;D_5__Corynebacterium	0	0	0.0502868	0	0	0	0	0	0	0.00719832	0.0363603	0	0.075889	0	0	0	0	0	0	0	0	0	0	0	0	0	0	0	0.0976944	0	0	0	0	0	0	0	0	0	0	0.0040124	0	0	0	0.0542242	0	0	0	0.0145275
D_0__Bacteria;D_1__Actinobacteria;D_2__Actinobacteria;D_3__Corynebacteriales;D_4__Corynebacteriaceae;D_5__Corynebacterium 1	0.19318	0.0956005	0.113358	0.132081	0.13613	0.049723	0.0717781	0.167069	0.156372	0.00989769	0.0685888	0.0456089	0.0498699	0.0488622	0.0718155	0.0923706	0.251953	0.823798	0.0705716	0.140277	0.20264	0.103544	0.0560827	0.179757	0.0525656	0.197855	0.00810945	0.22027	0.493357	0.998565	0.497477	0.0682334	0.0293203	0.142076	0.229658	0.0530385	0.0250042	0.00671051	0.041799	0.0110341	0.019296	0.012235	0.00590811	0.0507259	0.0337496	0.105993	0.00818406	0.110409
D_0__Bacteria;D_1__Actinobacteria;D_2__Actinobacteria;D_3__Corynebacteriales;D_4__Corynebacteriaceae;D_5__Lawsonella	0	0	0	0	0	0	0	0	0	0	0	0	0	0	0	0	0	0.016022	0	0	0	0	0	0	0	0	0	0.0129191	0	0	0	0	0	0	0	0	0	0	0	0	0	0	0	0	0	0	0	0
D_0__Bacteria;D_1__Actinobacteria;D_2__Actinobacteria;D_3__Corynebacteriales;D_4__Corynebacteriaceae;__	0	0	0	0	0	0.0230857	0.0091354	0	0	0	0	0	0	0	0	0	0	0	0	0	0.043814	0	0	0.0497788	0	0.0463722	0	0	0	0.247532	0	0	0	0.0196419	0	0	0	0	0	0	0	0.0262178	0	0	0.0374995	0	0	0
D_0__Bacteria;D_1__Actinobacteria;D_2__Actinobacteria;D_3__Corynebacteriales;D_4__Corynebacteriales Incertae Sedis;D_5__Tomitella	0	0	0	0	0	0	0	0	0	0	0	0	0	0	0	0	0	0	0	0	0	0	0	0	0	0	0	0	0	0	0	0	0	0	0	0	0	0	0	0	0	0	0	0	0	0	0	0
D_0__Bacteria;D_1__Actinobacteria;D_2__Actinobacteria;D_3__Corynebacteriales;D_4__Dietziaceae;D_5__Dietzia	0	0	0	0	0	0	0	0	0	0	0.0107428	0	0	0	0	0	0	0	0	0	0	0	0	0	0	0	0	0	0	0	0	0	0	0	0	0	0	0	0	0	0	0	0	0	0	0	0	0
D_0__Bacteria;D_1__Actinobacteria;D_2__Actinobacteria;D_3__Corynebacteriales;D_4__Mycobacteriaceae;D_5__Mycobacterium	0	0	0	0	0	0	0	0	0	0	0	0	0	0	0	0	0	0	0	0	0	0.103544	0	0	0	0	0	0	0	0	0	0	0	0	0	0	0	0	0	0	0	0	0	0	0	0	0	0
D_0__Bacteria;D_1__Actinobacteria;D_2__Actinobacteria;D_3__Corynebacteriales;D_4__Nocardiaceae;D_5__Gordonia	0	0	0	0	0	0	0	0	0	0	0	0	0	0	0	0	0	0	0	0.0106417	0	0	0	0	0	0	0	0	0	0	0	0	0	0	0	0	0	0	0	0	0	0	0	0	0	0	0	0
D_0__Bacteria;D_1__Actinobacteria;D_2__Actinobacteria;D_3__Corynebacteriales;D_4__Nocardiaceae;D_5__Rhodococcus	0	0.0274496	0	0	0.0723189	0.0408439	0	0.0259885	0.0171628	0	0.0471032	0	0	0	0.00852048	0	0.024063	0.0841155	0.00784129	0	0	0.0463628	0.0269197	0.042865	0.0119886	0.0231861	0	0	0.0488472	0.17721	0.078175	0.0100343	0.0726633	0.00261892	0.0255175	0.0632382	0	0	0.0522488	0	0	0	0	0	0.0224997	0.0201891	0	0.0566572
D_0__Bacteria;D_1__Actinobacteria;D_2__Actinobacteria;D_3__Corynebacteriales;D_4__Nocardiaceae;D_5__Williamsia	0	0	0	0	0	0	0	0	0	0	0	0	0	0	0	0	0	0	0	0	0	0	0	0	0	0	0	0	0	0	0	0.0220755	0	0	0	0	0	0	0	0	0	0	0	0	0	0	0	0
D_0__Bacteria;D_1__Actinobacteria;D_2__Actinobacteria;D_3__Corynebacteriales;D_4__Tsukamurellaceae;D_5__Tsukamurella	0	0	0	0	0	0	0	0	0	0	0	0	0	0	0	0	0	0	0	0	0	0	0	0	0	0	0	0	0	0	0	0	0	0	0	0	0	0	0	0	0	0	0	0	0	0	0	0
D_0__Bacteria;D_1__Actinobacteria;D_2__Actinobacteria;D_3__Frankiales;D_4__Cryptosporangiaceae;D_5__Fodinicola	0	0	0	0	0	0	0	0	0	0	0.00909008	0	0.0823938	0	0	0	0	0	0	0.0125765	0	0	0	0	0	0	0	0	0	0	0	0	0	0	0	0.0203994	0.0250042	0	0	0	0	0	0	0.031485	0	0	0	0
D_0__Bacteria;D_1__Actinobacteria;D_2__Actinobacteria;D_3__Frankiales;D_4__Sporichthyaceae;Ambiguous_taxa	0	0	0	0	0	0	0	0	0	0	0	0	0	0	0	0.00786133	0	0	0	0	0	0	0	0	0	0	0	0	0	0	0	0	0.00764877	0	0	0	0	0	0	0	0	0	0	0	0	0	0	0
D_0__Bacteria;D_1__Actinobacteria;D_2__Actinobacteria;D_3__Frankiales;D_4__Sporichthyaceae;D_5__Candidatus Planktophila	0	0	0	0	0	0	0	0	0	0	0	0	0	0	0	0	0	0	0	0	0	0	0	0	0	0	0	0	0.0390778	0	0	0	0	0	0	0	0	0.0251644	0	0	0.0206743	0.0157307	0	0	0	0	0	0.0246967
D_0__Bacteria;D_1__Actinobacteria;D_2__Actinobacteria;D_3__Frankiales;D_4__Sporichthyaceae;D_5__Sporichthya	0	0	0	0	0	0	0	0	0	0	0	0	0	0	0	0	0	0	0	0	0	0	0	0	0	0	0	0	0	0	0	0	0	0	0	0	0	0	0	0	0	0	0	0	0	0	0	0
D_0__Bacteria;D_1__Actinobacteria;D_2__Actinobacteria;D_3__Frankiales;D_4__Sporichthyaceae;__	0	0	0	0	0	0	0	0	0	0	0	0	0	0	0	0	0	0	0.0104551	0.0212834	0	0.00618171	0	0	0	0	0	0	0	0	0	0	0	0	0	0	0	0	0	0	0	0	0	0.0227392	0	0	0	0
D_0__Bacteria;D_1__Actinobacteria;D_2__Actinobacteria;D_3__Kineosporiales;D_4__Kineosporiaceae;D_5__Kineococcus	0	0	0	0	0	0	0.0130506	0	0	0	0	0	0	0	0	0	0	0	0	0	0	0	0	0.0096792	0	0	0	0	0	0	0	0	0	0	0	0	0	0	0	0	0	0	0	0	0	0.0100946	0	0
D_0__Bacteria;D_1__Actinobacteria;D_2__Actinobacteria;D_3__Micrococcales;D_4__Beutenbergiaceae;D_5__Serinibacter sp. K3-2	0	0	0	0	0	0	0	0	0	0	0	0	0	0	0	0	0	0	0	0	0	0	0	0	0	0	0	0	0	0	0	0.0561922	0	0	0	0	0	0	0	0	0	0	0	0	0	0	0	0
D_0__Bacteria;D_1__Actinobacteria;D_2__Actinobacteria;D_3__Micrococcales;D_4__Brevibacteriaceae;D_5__Brevibacterium	0.0255444	0.0255566	0.018751	0	0.0425405	0.019534	0.00783034	0	0	0.0188956	0	0	0	0	0	0	0	0	0.00348502	0.00386971	0.043814	0.00927257	0.0157032	0	0	0	0	0	0.0244236	0.0365672	0	0	0.0191219	0	0.0159485	0	0	0	0	0	0	0	0	0.0157425	0.0262497	0	0	0.0377715
D_0__Bacteria;D_1__Actinobacteria;D_2__Actinobacteria;D_3__Micrococcales;D_4__Cellulomonadaceae;D_5__Actinotalea	0	0	0	0	0	0	0	0	0	0	0	0	0	0	0	0	0	0	0	0	0	0	0.0112165	0	0	0	0	0	0	0	0	0	0	0	0	0	0	0	0	0	0	0	0	0	0	0	0	0
D_0__Bacteria;D_1__Actinobacteria;D_2__Actinobacteria;D_3__Micrococcales;D_4__Dermabacteraceae;D_5__Brachybacterium	0	0	0	0	0	0	0	0.0241322	0	0.0143966	0	0	0	0	0	0	0	0	0.047919	0	0	0	0	0	0	0	0	0	0.0293083	0	0	0	0.00764877	0	0	0	0	0	0.0104498	0	0	0	0	0	0	0	0	0
D_0__Bacteria;D_1__Actinobacteria;D_2__Actinobacteria;D_3__Micrococcales;D_4__Dermacoccaceae;D_5__Dermacoccus	0	0	0	0	0	0	0	0	0	0	0	0	0	0	0	0	0.00707734	0	0	0	0	0	0	0	0	0	0	0	0	0	0	0	0	0	0	0	0	0	0	0	0.0110263	0	0	0	0	0	0	0
D_0__Bacteria;D_1__Actinobacteria;D_2__Actinobacteria;D_3__Micrococcales;D_4__Microbacteriaceae;Ambiguous_taxa	0	0	0	0	0	0	0	0	0	0	0	0	0	0	0	0	0	0	0	0	0	0.0741805	0	0.0096792	0.00829983	0	0	0	0	0	0.127923	0	0	0	0	0	0	0	0	0	0	0	0	0	0	0	0	0
D_0__Bacteria;D_1__Actinobacteria;D_2__Actinobacteria;D_3__Micrococcales;D_4__Microbacteriaceae;D_5__Agrococcus	0	0	0	0	0	0	0	0	0	0	0	0	0	0	0	0	0	0	0	0	0	0	0	0	0	0	0	0	0	0	0	0	0	0	0	0	0	0	0	0	0	0	0	0	0	0.0134594	0	0
D_0__Bacteria;D_1__Actinobacteria;D_2__Actinobacteria;D_3__Micrococcales;D_4__Microbacteriaceae;D_5__Aurantimicrobium	0.0622645	0	0	0	0	0	0	0	0.00762791	0	0	0	0	0	0	0	0	0	0	0	0	0	0	0	0.0129108	0	0	0	0	0	0	0	0.0127479	0	0	0	0	0	0	0	0	0.00699142	0	0	0	0	0	0.0101692
D_0__Bacteria;D_1__Actinobacteria;D_2__Actinobacteria;D_3__Micrococcales;D_4__Microbacteriaceae;D_5__Candidatus Aquiluna	0	0	0.0664809	0	0	0	0.0156607	0	0	0	0.044624	0	0.0802255	0.0401368	0.0267787	0	0.0184011	0	0.0557603	0.0474039	0.0711978	0	0	0	0.0368881	0	0	0.217686	0.0683861	0.0843858	0.24637	0.0642196	0.00764877	0.00851147	0	0	0.0208368	0	0.0626985	0.0611891	0.0606445	0.0402007	0.0051696	0.0699668	0.0599993	0.0723443	0.0276212	0.0421297
D_0__Bacteria;D_1__Actinobacteria;D_2__Actinobacteria;D_3__Micrococcales;D_4__Microbacteriaceae;D_5__Candidatus Planktoluna	0	0	0	0	0	0	0	0	0	0	0	0	0	0	0	0	0	0	0	0	0	0	0	0	0	0	0	0	0	0	0	0	0	0	0	0	0	0	0	0	0	0	0	0	0	0	0	0
D_0__Bacteria;D_1__Actinobacteria;D_2__Actinobacteria;D_3__Micrococcales;D_4__Microbacteriaceae;D_5__Clavibacter	0	0	0	0	0	0	0	0	0	0	0	0.0108021	0	0	0.0158237	0	0	0	0	0.0415993	0	0.0339994	0.0157032	0	0	0.0139116	0	0	0	0	0	0	0	0	0	0.0326391	0	0	0	0	0	0	0	0	0	0.0134594	0	0
D_0__Bacteria;D_1__Actinobacteria;D_2__Actinobacteria;D_3__Micrococcales;D_4__Microbacteriaceae;D_5__Curtobacterium	0	0.0151446	0.0170464	0.0293513	0	0.0230857	0.0574225	0.129942	0.0286047	0.0296931	0.123129	0.020404	0.0628794	0.0593327	0.0206926	0.053064	0.024063	0.056077	0.0627303	0.0425668	0.0602443	0.118998	0.260224	0.362279	0.0184441	0.183943	0	0.0167948	0	0.745408	0.317438	0.0782677	0.00509918	0.0995188	0	0.104037	0	0.026842	0.0167196	0.0270837	0.0234308	0.0192264	0	0.220395	0.0562493	0.0807564	0.0194371	0
D_0__Bacteria;D_1__Actinobacteria;D_2__Actinobacteria;D_3__Micrococcales;D_4__Microbacteriaceae;D_5__Frigoribacterium	0.0287375	0.0170377	0	0	0.144638	0.0142066	0.0182708	0.0315575	0.0190698	0.0134969	0	0.0192038	0	0.0401368	0.0182582	0.02948	0.0155702	0.0707638	0	0.079329	0	0	0.0224331	0.0995575	0.0165997	0.143754	0	0	0	0.151894	0	0.0260892	0	0	0	0.0856776	0	0	0.0208995	0.0110341	0	0	0	0.0542242	0	0	0.00409203	0.0595627
D_0__Bacteria;D_1__Actinobacteria;D_2__Actinobacteria;D_3__Micrococcales;D_4__Microbacteriaceae;D_5__Frondihabitans	0	0	0	0	0	0	0	0	0	0	0	0	0	0	0	0	0	0	0	0	0	0	0	0	0	0	0	0.0697629	0	0	0	0.0381304	0	0	0	0	0	0	0	0	0	0	0	0.0559734	0	0	0	0
D_0__Bacteria;D_1__Actinobacteria;D_2__Actinobacteria;D_3__Micrococcales;D_4__Microbacteriaceae;D_5__Galbitalea	0	0	0	0	0	0	0	0	0	0	0	0	0	0	0	0	0	0	0	0	0	0	0	0	0	0	0	0	0	0	0	0	0	0	0	0	0	0	0	0	0	0	0	0	0	0	0	0
D_0__Bacteria;D_1__Actinobacteria;D_2__Actinobacteria;D_3__Micrococcales;D_4__Microbacteriaceae;D_5__Labedella	0	0	0	0	0	0	0	0	0	0.00449895	0	0	0	0	0	0	0.00707734	0	0	0	0	0	0	0	0	0	0	0	0	0	0	0	0	0	0	0	0	0	0	0	0	0	0	0	0	0	0	0
D_0__Bacteria;D_1__Actinobacteria;D_2__Actinobacteria;D_3__Micrococcales;D_4__Microbacteriaceae;D_5__Leifsonia	0	0	0	0	0	0	0	0	0	0	0	0	0	0	0	0	0	0	0	0	0	0	0	0	0	0	0	0	0	0	0	0	0	0	0	0	0	0	0	0	0	0	0	0	0	0	0	0
D_0__Bacteria;D_1__Actinobacteria;D_2__Actinobacteria;D_3__Micrococcales;D_4__Microbacteriaceae;D_5__Leucobacter	0	0.00851886	0	0	0	0	0	0	0	0.00269937	0	0.0456089	0	0	0.00608606	0	0	0.0988024	0	0	0	0	0	0	0.013833	0	0	0	0	0	0	0	0.0305951	0	0	0	0	0.00838814	0	0	0.019296	0	0	0	0	0	0	0
D_0__Bacteria;D_1__Actinobacteria;D_2__Actinobacteria;D_3__Micrococcales;D_4__Microbacteriaceae;D_5__ML602J-51	0	0	0	0	0	0	0	0	0	0	0	0	0	0	0	0	0	0	0	0	0	0	0	0	0	0	0	0	0	0	0	0	0	0.00982093	0.0478454	0	0.0583431	0.00671051	0	0.0682108	0.0909667	0.0227221	0	0.0349834	0.0637492	0.0134594	0.00920707	0.0711847
D_0__Bacteria;D_1__Actinobacteria;D_2__Actinobacteria;D_3__Micrococcales;D_4__Microbacteriaceae;D_5__Microbacterium	0.0271409	0.00851886	0.0315358	0	0	0	0	0.0185632	0.00953489	0	0.0107428	0.0192038	0.0173461	0.0122156	0	0.035376	0	0	0.00522753	0	0.087628	0.0834531	0.0987056	0	0.10052	0.0510094	0	0.0239003	0	0.0928244	0.106602	0.0160549	0	0	0	0	0	0	0	0	0	0	0	0.0244884	0	0	0	0.00435825
D_0__Bacteria;D_1__Actinobacteria;D_2__Actinobacteria;D_3__Micrococcales;D_4__Microbacteriaceae;D_5__Okibacterium	0	0.0709905	0	0	0	0.0337406	0	0.0092816	0	0	0	0.0312061	0	0	0	0	0	0	0	0.0106417	0	0.0200906	0.0201898	0.0843473	0	0	0	0	0	0.0731344	0	0	0	0	0	0	0	0	0	0	0	0	0	0.0139934	0	0	0	0
D_0__Bacteria;D_1__Actinobacteria;D_2__Actinobacteria;D_3__Micrococcales;D_4__Microbacteriaceae;D_5__Plantibacter	0.030334	0.0151446	0.0144894	0	0.0255243	0.0426197	0	0.0389827	0.0133488	0	0	0.00600118	0	0.0157057	0.0121721	0.035376	0.0268939	0.048066	0	0.0628827	0.0931048	0.0448174	0.0830024	0.0705199	0.0184441	0.123659	0	0	0.0683861	0.213777	0	0.0361235	0.00764877	0	0	0.165235	0	0.00838814	0.0376191	0	0.0151611	0	0	0.0454784	0	0.0622497	0.0102301	0
D_0__Bacteria;D_1__Actinobacteria;D_2__Actinobacteria;D_3__Micrococcales;D_4__Microbacteriaceae;D_5__Pseudoclavibacter	0.0287375	0	0	0	0.0170162	0	0	0	0	0	0	0	0	0	0	0	0.0127392	0	0	0	0	0	0	0.0511615	0	0.0108202	0	0.0387572	0	0	0	0	0	0	0	0	0	0.0100658	0	0.020062	0	0	0	0	0	0	0	0
D_0__Bacteria;D_1__Actinobacteria;D_2__Actinobacteria;D_3__Micrococcales;D_4__Microbacteriaceae;D_5__Rathayibacter	0	0	0	0	0	0	0	0.0241322	0.0114419	0	0	0.0132026	0	0.00698032	0.0255614	0	0	0	0	0.0106417	0	0	0.0672993	0	0	0	0	0.0813901	0	0.0365672	0.0260583	0.0200686	0.0203967	0	0.0127588	0.0285592	0	0	0	0.0140434	0	0	0	0	0	0	0	0
D_0__Bacteria;D_1__Actinobacteria;D_2__Actinobacteria;D_3__Micrococcales;D_4__Microbacteriaceae;D_5__Rhodoglobus	0	0	0	0	0	0	0	0	0	0	0	0	0	0	0	0	0	0	0	0	0	0	0.0157032	0	0	0	0	0	0	0	0	0.0501716	0.0573658	0	0	0.0163195	0	0	0	0	0	0	0	0	0	0	0	0.0203385
D_0__Bacteria;D_1__Actinobacteria;D_2__Actinobacteria;D_3__Micrococcales;D_4__Microbacteriaceae;D_5__Rhodoluna	0.0271409	0	0	0	0	0.0266373	0.0169657	0	0	0.0125971	0.0173538	0	0	0.0174508	0.0133893	0	0	0	0	0	0	0	0	0	0	0	0	0	0	0	0.075806	0.0381304	0	0.00982093	0	0	0	0	0	0.0310961	0	0	0	0.0402309	0	0	0.00920707	0.023244
D_0__Bacteria;D_1__Actinobacteria;D_2__Actinobacteria;D_3__Micrococcales;D_4__Microbacteriaceae;D_5__Yonghaparkia	0	0	0.00681855	0	0	0	0	0	0	0	0	0	0	0	0	0	0	0	0	0.072557	0	0	0	0	0	0	0	0	0	0	0	0	0	0	0	0	0	0	0	0	0	0	0	0	0.0412495	0	0	0
D_0__Bacteria;D_1__Actinobacteria;D_2__Actinobacteria;D_3__Micrococcales;D_4__Microbacteriaceae;__	0	0	0	0	0	0	0	0	0	0	0	0	0	0	0	0	0.00990828	0.0267033	0	0	0	0	0	0.0138274	0	0	0	0	0	0	0.0450098	0	0	0	0	0	0	0.0100658	0	0	0	0	0	0	0	0	0	0
D_0__Bacteria;D_1__Actinobacteria;D_2__Actinobacteria;D_3__Micrococcales;D_4__Micrococcaceae;D_5__Arthrobacter	0	0	0	0	0	0	0.0169657	0	0	0	0	0	0.0390286	0	0	0	0	0	0	0	0	0	0	0	0.00645542	0	0	0	0.0244236	0	0	0	0	0	0	0	0	0	0	0	0	0	0	0	0	0	0	0
D_0__Bacteria;D_1__Actinobacteria;D_2__Actinobacteria;D_3__Micrococcales;D_4__Micrococcaceae;D_5__Enteractinococcus	0	0	0	0	0	0	0	0	0	0	0	0	0	0	0	0	0	0	0	0	0	0	0	0	0	0	0	0	0	0	0	0	0	0	0	0	0	0	0	0	0	0	0	0	0	0	0.0112531	0.0087165
D_0__Bacteria;D_1__Actinobacteria;D_2__Actinobacteria;D_3__Micrococcales;D_4__Micrococcaceae;D_5__Glutamicibacter	0.00798263	0	0	0	0	0	0	0	0	0	0.00330548	0.00960188	0	0.0296663	0	0	0.0141547	0.0600825	0	0	0	0.0247268	0	0.0096792	0	0	0	0	0	0.0703215	0	0	0	0	0	0	0	0	0.0689684	0.0130403	0	0	0	0.0437292	0	0	0	0.052299
D_0__Bacteria;D_1__Actinobacteria;D_2__Actinobacteria;D_3__Micrococcales;D_4__Micrococcaceae;D_5__Kocuria	0	0	0	0	0	0	0	0	0	0	0	0	0	0	0.00852048	0	0	0	0	0	0	0	0	0	0	0	0	0	0	0	0	0	0	0	0	0	0	0	0	0	0.0137828	0	0	0	0	0.0521552	0	0
D_0__Bacteria;D_1__Actinobacteria;D_2__Actinobacteria;D_3__Micrococcales;D_4__Micrococcaceae;D_5__Micrococcus	0	0	0	0	0	0	0	0	0	0	0	0.0480094	0	0	0	0	0.021232	0	0	0	0	0	0	0	0	0.0340062	0	0	0	0	0.104233	0.0220755	0	0	0	0.0407988	0	0	0	0.0491519	0	0.0262178	0	0	0.0374995	0	0	0.0246967
D_0__Bacteria;D_1__Actinobacteria;D_2__Actinobacteria;D_3__Micrococcales;D_4__Micrococcaceae;D_5__Paenarthrobacter	0	0	0	0	0	0	0	0	0	0	0	0	0	0	0	0	0	0	0	0	0	0	0	0	0	0	0	0	0	0	0	0	0	0	0	0	0	0	0	0	0	0	0	0	0	0	0	0
D_0__Bacteria;D_1__Actinobacteria;D_2__Actinobacteria;D_3__Micrococcales;D_4__Micrococcaceae;D_5__Paeniglutamicibacter	0	0	0	0	0	0	0	0	0	0	0	0	0	0	0	0	0	0	0	0	0	0.0247268	0	0	0	0	0	0.0206705	0	0.208152	0	0	0	0	0	0	0	0	0	0	0	0	0	0	0	0	0	0
D_0__Bacteria;D_1__Actinobacteria;D_2__Actinobacteria;D_3__Micrococcales;D_4__Micrococcaceae;D_5__Pseudoglutamicibacter	0	0	0	0	0	0	0	0	0	0	0	0	0	0	0	0	0	0	0	0	0	0.0123634	0	0	0	0	0	0	0	0	0	0	0	0	0	0	0	0	0	0	0	0	0	0	0	0	0	0
D_0__Bacteria;D_1__Actinobacteria;D_2__Actinobacteria;D_3__Micrococcales;D_4__Micrococcaceae;D_5__Renibacterium	0	0	0	0	0	0	0	0	0	0	0	0	0	0	0	0	0	0	0	0	0	0	0	0	0	0	0	0	0	0	0	0	0	0	0	0	0	0	0	0	0	0	0	0	0	0	0	0
D_0__Bacteria;D_1__Actinobacteria;D_2__Actinobacteria;D_3__Micrococcales;D_4__Micrococcaceae;D_5__Rothia	0	0	0	0	0	0	0.0978793	0.269167	0	0	0	0	0	0	0	0	0	0	0	0	0	0	0	0	0	0	0	0	0	0	0	0	0	0	0	0	0	0	0	0	0	0	0	0	0	0	0	0
D_0__Bacteria;D_1__Actinobacteria;D_2__Actinobacteria;D_3__Micrococcales;D_4__Micrococcaceae;D_5__Yaniella	0	0	0	0	0	0	0	0	0	0	0	0	0	0	0	0	0	0	0	0	0	0	0	0	0	0	0	0	0	0	0	0	0.0191219	0	0	0	0.0250042	0	0	0	0	0	0	0.00699668	0	0	0	0
D_0__Bacteria;D_1__Actinobacteria;D_2__Actinobacteria;D_3__Micrococcales;D_4__Micrococcaceae;__	0	0	0	0	0	0	0	0	0.00572093	0	0	0	0	0	0	0	0	0	0	0	0	0	0	0	0	0	0	0	0	0	0	0	0	0	0	0	0	0	0	0	0	0	0	0	0	0	0	0
D_0__Bacteria;D_1__Actinobacteria;D_2__Actinobacteria;D_3__Micrococcales;D_4__Sanguibacteraceae;D_5__Sanguibacter	0	0	0	0	0	0	0	0	0.0152558	0.00539874	0	0	0	0	0.0146065	0	0.0410486	0	0	0.0106417	0	0	0	0.0414823	0	0	0	0	0	0	0	0	0	0	0	0	0	0	0	0	0.00551314	0	0	0.02099	0	0	0	0
D_0__Bacteria;D_1__Actinobacteria;D_2__Actinobacteria;D_3__PeM15;Ambiguous_taxa;Ambiguous_taxa	0	0	0	0	0	0	0	0	0	0	0.0107428	0	0	0	0	0	0	0	0	0	0	0	0	0	0	0.0680125	0	0	0	0	0	0	0	0	0	0.0183595	0	0	0	0.0080248	0	0	0	0.0332342	0.0487494	0.0218715	0	0
D_0__Bacteria;D_1__Actinobacteria;D_2__Actinobacteria;D_3__PeM15;D_4__metagenome;D_5__metagenome	0	0	0	0	0	0	0	0	0.0209768	0	0	0	0	0	0	0	0	0	0	0	0	0	0	0.0207412	0	0	0	0	0	0.0225029	0	0	0	0	0	0	0	0	0	0	0	0	0	0	0	0	0	0
D_0__Bacteria;D_1__Actinobacteria;D_2__Actinobacteria;D_3__PeM15;D_4__uncultured bacterium;D_5__uncultured bacterium	0	0	0	0	0	0	0	0	0	0	0	0	0	0	0	0	0	0	0	0	0	0	0	0	0	0	0	0	0	0	0	0	0	0	0	0	0	0	0	0	0	0	0	0	0	0	0	0
D_0__Bacteria;D_1__Actinobacteria;D_2__Actinobacteria;D_3__PeM15;__;__	0	0	0	0	0	0	0	0	0	0	0	0	0	0.0157057	0	0	0	0	0	0	0	0	0	0	0	0	0	0	0	0	0	0	0	0	0	0	0	0	0	0	0	0	0	0	0	0	0	0
D_0__Bacteria;D_1__Actinobacteria;D_2__Actinobacteria;D_3__Propionibacteriales;D_4__Nocardioidaceae;D_5__Aeromicrobium	0	0.00567924	0	0	0.0297784	0	0	0	0	0	0	0.0168033	0	0	0	0	0	0	0	0	0	0	0	0	0	0	0	0	0	0	0	0	0	0	0	0	0	0	0	0	0	0	0	0	0	0	0	0
D_0__Bacteria;D_1__Actinobacteria;D_2__Actinobacteria;D_3__Propionibacteriales;D_4__Nocardioidaceae;D_5__Nocardioides	0	0	0	0	0	0	0	0	0	0	0	0	0	0	0	0	0	0	0	0	0	0	0	0	0	0	0	0	0	0	0	0	0	0	0	0	0	0	0	0	0	0	0	0	0	0	0	0
D_0__Bacteria;D_1__Actinobacteria;D_2__Actinobacteria;D_3__Propionibacteriales;D_4__Propionibacteriaceae;D_5__Acidipropionibacterium	0.0127722	0	0	0	0	0	0.00783034	0	0	0	0.0421449	0	0	0.0471171	0	0.0314453	0	0	0	0	0	0	0	0	0	0	0	0	0	0	0	0	0	0	0	0	0	0	0	0	0	0	0	0	0	0	0	0
D_0__Bacteria;D_1__Actinobacteria;D_2__Actinobacteria;D_3__Propionibacteriales;D_4__Propionibacteriaceae;D_5__Cutibacterium	0	0	0	0	0	0	0	0	0	0	0	0.0216042	0	0	0	0	0.00707734	0.295072	0.126332	0	0	0	0.0448662	0	0	0.09429	0	0	0	0.0731344	0.196622	0.0260892	0.0216715	0.0752938	0	0	0	0	0.0208995	0.0351085	0	0.0227221	0	0	0	0.0218715	0.0132991	0
D_0__Bacteria;D_1__Actinobacteria;D_2__Actinobacteria;D_3__Propionibacteriales;D_4__Propionibacteriaceae;D_5__Friedmanniella	0	0	0	0	0	0	0	0	0	0	0	0	0	0	0	0	0	0	0	0	0	0	0	0	0	0	0	0	0	0	0	0	0	0	0	0	0	0	0	0	0	0	0	0	0	0	0	0
D_0__Bacteria;D_1__Actinobacteria;D_2__Actinobacteria;D_3__Propionibacteriales;D_4__Propionibacteriaceae;D_5__Luteococcus	0	0	0	0	0	0	0	0	0	0	0	0	0	0	0	0	0	0	0	0	0	0	0	0	0	0	0	0	0	0	0	0	0	0	0	0	0	0	0	0	0	0	0	0	0	0	0	0
D_0__Bacteria;D_1__Actinobacteria;D_2__Actinobacteria;D_3__Propionibacteriales;D_4__Propionibacteriaceae;D_5__Propionibacterium	0.0622645	0	0.0153417	0.044027	0	0	0.0443719	0.0909597	0.0190698	0.0116973	0.0429713	0.0540106	0.104076	0.0157057	0.00852048	0.0216186	0.00707734	0.0841155	0.0496615	0.013544	0.131442	0	0.0246764	0	0	0	0	0	0	0	0	0.0180618	0	0	0	0	0	0	0	0	0	0	0	0	0	0	0	0
D_0__Bacteria;D_1__Actinobacteria;D_2__Actinobacteria;D_3__Propionibacteriales;D_4__Propionibacteriaceae;D_5__Propioniciclava	0	0	0	0	0	0	0	0	0	0	0	0	0	0	0.0182582	0	0	0	0	0	0	0	0	0	0	0	0	0	0	0	0	0	0	0	0	0	0	0	0	0	0	0	0	0	0	0	0	0
D_0__Bacteria;D_1__Actinobacteria;D_2__Actinobacteria;D_3__Propionibacteriales;D_4__Propionibacteriaceae;D_5__Pseudopropionibacterium	0	0	0	0	0	0	0	0	0	0	0	0	0	0	0	0	0	0	0	0	0	0	0	0	0	0	0	0	0	0	0	0	0	0	0	0	0	0	0	0	0	0	0	0	0	0	0.00409203	0
D_0__Bacteria;D_1__Actinobacteria;D_2__Actinobacteria;D_3__Propionibacteriales;D_4__Propionibacteriaceae;D_5__Tessaracoccus	0	0	0	0	0	0	0	0	0	0	0	0	0.0498699	0.0261762	0.0109549	0	0	0	0	0.052241	0	0	0	0	0	0	0	0	0.0195389	0	0	0	0	0	0	0	0	0	0	0	0	0	0	0	0	0	0	0
D_0__Bacteria;D_1__Actinobacteria;D_2__Actinobacteria;D_3__Propionibacteriales;D_4__Propionibacteriaceae;D_5__uncultured	0	0	0	0	0	0	0	0	0	0	0	0.00600118	0	0	0	0	0	0	0	0	0	0	0	0	0	0	0	0	0	0	0	0	0	0	0	0	0	0	0	0	0	0	0	0	0	0	0	0
D_0__Bacteria;D_1__Actinobacteria;D_2__Actinobacteria;D_3__Propionibacteriales;D_4__Propionibacteriaceae;__	0	0	0	0	0	0	0	0	0	0	0	0	0	0	0	0	0	0	0	0	0	0	0	0	0	0	0	0	0	0.03938	0	0	0	0	0	0	0	0	0	0	0	0	0	0	0	0	0	0
D_0__Bacteria;D_1__Actinobacteria;D_2__Actinobacteria;D_3__Pseudonocardiales;D_4__Pseudonocardiaceae;Ambiguous_taxa	0	0	0	0	0	0	0	0	0	0	0	0	0	0	0	0	0	0	0	0	0	0	0	0	0	0	0	0	0	0	0	0	0	0	0	0.0183595	0	0	0	0	0	0	0	0	0	0	0.00716105	0.0246967
D_0__Bacteria;D_1__Actinobacteria;D_2__Actinobacteria;D_3__Pseudonocardiales;D_4__Pseudonocardiaceae;D_5__Saccharopolyspora	0	0.0454339	0.0818226	0.0293513	0.0340324	0	0.0613377	0.0241322	0.0610233	0	0.0545405	0.0120024	0.0108413	0	0.0340819	0.0196533	0	0	0	0.0483713	0	0.086544	0	0.0110619	0	0.0200946	0	0	0.0390778	0	0.0236894	0.0260892	0.108358	0.115887	0.0287072	0.193794	0.0125021	0.013421	0	0.0090279	0.0454834	0.0262178	0	0.0839601	0	0.0588849	0.00716105	0.111862
D_0__Bacteria;D_1__Actinobacteria;D_2__Actinobacteria;D_3__Streptomycetales;D_4__Streptomycetaceae;D_5__Streptomyces	0	0	0	0	0	0	0	0	0	0	0	0	0	0	0.00730327	0	0	0	0	0.00773941	0	0	0	0	0.00368881	0	0	0	0	0	0	0	0.049717	0	0	0	0	0	0	0	0	0	0	0.0244884	0.0112499	0	0	0
D_0__Bacteria;D_1__Actinobacteria;D_2__Actinobacteria;D_3__Streptosporangiales;D_4__Nocardiopsaceae;D_5__Nocardiopsis	0	0	0	0	0	0	0	0	0	0	0	0	0	0	0	0	0	0	0	0	0	0	0	0	0	0	0	0	0	0	0	0	0	0	0	0	0	0	0	0	0	0	0	0	0	0	0	0
D_0__Bacteria;D_1__Actinobacteria;D_2__Actinobacteria;D_3__Streptosporangiales;__;__	0	0	0	0	0	0	0	0	0	0	0	0	0	0	0	0	0	0	0	0	0	0	0.0538394	0	0	0	0	0	0	0	0	0	0	0	0	0	0	0	0	0	0	0	0	0	0	0	0	0
D_0__Bacteria;D_1__Actinobacteria;D_2__Coriobacteriia;D_3__Coriobacteriales;D_4__Atopobiaceae;D_5__Atopobium	0	0	0	0	0	0	0	0	0	0	0	0	0	0	0	0	0.00849281	0	0	0	0	0	0	0	0	0.0185489	0	0	0	0	0	0	0	0	0	0	0	0	0	0	0	0	0	0	0	0	0	0
D_0__Bacteria;D_1__Actinobacteria;D_2__Coriobacteriia;D_3__Coriobacteriales;D_4__Atopobiaceae;D_5__Olsenella	0.0175618	0.0132516	0.00937551	0	0	0.0106549	0.0091354	0	0	0.00719832	0.0057846	0.00960188	0.0390286	0.00523524	0.017041	0.0196533	0.00707734	0	0	0.0106417	0	0	0	0	0	0	0	0	0	0	0	0.0120412	0	0	0	0.0611983	0	0	0	0.0070217	0.0358354	0	0	0	0	0	0	0
D_0__Bacteria;D_1__Actinobacteria;D_2__Coriobacteriia;D_3__Coriobacteriales;D_4__Atopobiaceae;__	0.0143687	0.00283962	0.0707425	0.0403581	0	0.0159824	0.0169657	0.0167069	0.0190698	0.0224948	0.0123956	0.00480094	0	0	0.0133893	0	0.0339712	0.008011	0.0313652	0.0319251	0	0.0958165	0	0.0179757	0.00829983	0.0401892	0	0	0.0781555	0.0168772	0.0142136	0.0381304	0	0	0	0	0	0	0	0	0	0	0	0.0227392	0	0	0	0
D_0__Bacteria;D_1__Actinobacteria;D_2__Coriobacteriia;D_3__Coriobacteriales;D_4__Coriobacteriales Incertae Sedis;D_5__Raoultibacter	0	0	0	0	0	0	0	0	0	0	0	0.0108021	0	0	0.00365163	0	0	0	0	0	0	0	0	0	0	0	0	0	0	0	0	0.014048	0	0	0	0	0	0	0	0	0	0	0	0	0	0	0	0
D_0__Bacteria;D_1__Actinobacteria;D_2__Coriobacteriia;D_3__Coriobacteriales;D_4__Eggerthellaceae;D_5__Denitrobacterium	0	0	0	0	0	0	0	0	0	0	0	0	0	0	0	0	0	0	0	0	0	0	0	0	0	0	0	0	0	0	0	0	0	0	0	0	0	0	0	0	0	0	0	0	0	0	0	0
D_0__Bacteria;D_1__Actinobacteria;D_2__Coriobacteriia;D_3__Coriobacteriales;D_4__Eggerthellaceae;D_5__Enterorhabdus	0.00798263	0	0	0	0	0	0	0	0	0	0	0	0	0	0.00852048	0	0	0	0	0	0	0	0	0	0	0	0	0	0	0	0	0	0	0	0	0	0	0	0	0	0	0	0	0	0	0	0	0
D_0__Bacteria;D_1__Actinobacteria;D_2__Coriobacteriia;D_3__Coriobacteriales;D_4__Eggerthellaceae;D_5__uncultured	0.0143687	0.0340754	0.0664809	0	0	0	0.0469821	0.0389827	0.0476744	0.00989769	0	0.0324064	0.0520382	0.0349016	0.0279959	0.0275146	0.0962518	0.08011	0.306682	0.278619	0	0.350812	0.109922	0.268252	0.116198	0.289053	0	0	0.151426	0.618829	0.135029	0.0642196	0	0	0	0.0163195	0	0.00503288	0	0	0	0.00873927	0	0.0437292	0	0	0	0.0159802
D_0__Bacteria;D_1__Actinobacteria;D_2__Coriobacteriia;D_3__OPB41;__;__	0	0	0	0	0	0	0	0	0	0	0	0	0	0	0	0	0	0	0	0	0	0	0	0	0	0	0	0	0	0	0	0	0	0	0	0	0	0	0	0	0	0	0	0	0	0	0	0.0363187
D_0__Bacteria;D_1__Actinobacteria;D_2__Coriobacteriia;__;__;__	0	0	0	0	0.0127622	0	0	0	0	0	0	0	0	0	0	0	0	0	0	0	0	0	0.00672993	0.00691372	0	0.0123659	0	0	0	0	0	0	0	0	0	0	0	0	0	0	0	0	0	0	0	0	0	0
D_0__Bacteria;D_1__Actinobacteria;D_2__Thermoleophilia;D_3__Solirubrobacterales;D_4__67-14;Ambiguous_taxa	0	0	0	0	0	0	0	0	0	0.0269937	0.0537141	0	0	0	0	0	0	0	0	0	0	0	0	0	0	0	0	0	0	0	0	0	0	0	0	0	0	0	0	0	0	0	0	0	0	0	0	0
D_0__Bacteria;D_1__Armatimonadetes;D_2__Armatimonadia;D_3__Armatimonadales;D_4__Armatimonadaceae;D_5__Armatimonas	0	0	0	0	0	0	0	0	0	0	0	0.00840165	0	0	0	0	0	0	0	0	0.0383373	0	0	0	0	0	0	0	0	0	0.0142136	0	0	0	0	0	0	0	0	0	0	0	0	0	0	0	0	0
D_0__Bacteria;D_1__Bacteroidetes;D_2__Bacteroidia;D_3__Bacteroidales;D_4__Bacteroidaceae;D_5__Bacteroides	0.0255444	0.107905	0.0997213	0	0.0510486	0.0159824	0.0769984	0.0779655	0.00762791	0.0440897	0.0057846	0	0	0.0453721	0.0133893	0.11792	0.142962	0.164226	0.0609878	0.112222	0.0821513	0.537809	0.62364	0.676162	0.102365	0.401892	0	0.0523222	0.122118	0.109702	0.151612	0.244837	0	0	0	0.0469187	0.0125021	0	0.00626985	0	0.0234308	0.0174785	0	0.0349834	0	0.0168243	0	0.0537517
D_0__Bacteria;D_1__Bacteroidetes;D_2__Bacteroidia;D_3__Bacteroidales;D_4__Dysgonomonadaceae;D_5__Dysgonomonas	0	0.00189308	0	0	0	0	0	0	0	0	0	0	0	0	0	0	0	0	0	0	0	0	0	0	0	0.0139116	0	0	0	0	0	0	0	0	0	0	0	0	0	0	0	0	0	0	0	0	0	0
D_0__Bacteria;D_1__Bacteroidetes;D_2__Bacteroidia;D_3__Bacteroidales;D_4__Marinifilaceae;D_5__Marinifilum	0	0.00378616	0	0	0	0	0	0	0	0	0	0	0	0	0	0	0	0	0	0	0	0.00772714	0.0224331	0.0110619	0	0.0262776	0	0	0	0.0590701	0	0.0541853	0	0	0	0	0	0	0	0	0	0	0	0	0	0	0	0
D_0__Bacteria;D_1__Bacteroidetes;D_2__Bacteroidia;D_3__Bacteroidales;D_4__Marinifilaceae;D_5__Odoribacter	0	0	0	0	0	0	0	0	0	0	0	0	0	0	0	0	0.045295	0	0	0	0	0	0.029163	0.0110619	0	0	0	0	0	0	0	0	0	0	0	0	0	0	0	0	0	0	0	0	0	0	0	0
D_0__Bacteria;D_1__Bacteroidetes;D_2__Bacteroidia;D_3__Bacteroidales;D_4__Marinifilaceae;D_5__uncultured	0	0	0	0	0	0	0	0	0	0	0	0	0	0	0	0	0	0	0	0.020316	0	0.00463628	0.029163	0.00414823	0	0	0	0	0	0.00843858	0	0.0100343	0	0	0	0	0	0	0	0	0	0	0	0	0	0	0	0
D_0__Bacteria;D_1__Bacteroidetes;D_2__Bacteroidia;D_3__Bacteroidales;D_4__Marinifilaceae;__	0	0	0	0	0	0	0	0	0	0	0	0	0	0	0	0	0	0	0	0	0	0	0	0	0	0	0	0	0	0	0	0	0	0	0	0	0	0	0	0	0	0	0	0	0	0	0	0
D_0__Bacteria;D_1__Bacteroidetes;D_2__Bacteroidia;D_3__Bacteroidales;D_4__Paludibacteraceae;D_5__Paludibacter	0	0.00851886	0	0.0183446	0	0	0	0	0	0	0	0	0	0	0	0	0	0	0	0	0	0	0	0	0	0	0	0	0	0	0	0	0	0	0	0	0	0	0	0	0	0	0	0	0	0	0	0
D_0__Bacteria;D_1__Bacteroidetes;D_2__Bacteroidia;D_3__Bacteroidales;D_4__Paludibacteraceae;D_5__uncultured	0	0	0	0	0	0	0	0	0	0	0	0	0	0	0	0	0	0	0	0	0	0.0139089	0.0157032	0	0	0.0340062	0	0	0	0	0	0	0	0	0	0	0	0	0	0	0	0	0	0	0	0	0	0
D_0__Bacteria;D_1__Bacteroidetes;D_2__Bacteroidia;D_3__Bacteroidales;D_4__Porphyromonadaceae;D_5__Porphyromonas	0	0	0	0	0	0	0	0	0	0	0	0	0	0	0	0	0	0	0	0	0	0	0	0	0	0	0	0	0	0	0	0	0	0	0	0	0	0	0	0	0	0	0	0	0	0	0	0
D_0__Bacteria;D_1__Bacteroidetes;D_2__Bacteroidia;D_3__Bacteroidales;D_4__Prevotellaceae;D_5__Prevotella	0	0	0	0	0	0	0	0	0	0	0	0	0	0	0	0	0	0	0	0	0	0	0	0	0	0	0	0	0	0	0	0	0	0	0	0	0	0	0	0	0	0	0	0	0	0	0	0
D_0__Bacteria;D_1__Bacteroidetes;D_2__Bacteroidia;D_3__Bacteroidales;D_4__Prevotellaceae;D_5__Prevotella 7	0.29855	0.300053	0.27189	0.33754	0.306292	0.126083	0.404568	0.139224	0.125861	0.21505	0.230558	0.35887	0.190807	0.328075	0.545311	0.487402	0.0113237	0.0774397	0	0.0193485	0	0.0154543	0	0.0248894	0.00553322	0	0	0	0	0	0	0.0842883	0.232013	0	0.0127588	0.0509986	0.187531	0.0201315	0.0313493	0.0310961	0.0165394	0.0227221	0	0.351583	0.0149998	0	0.00920707	0
D_0__Bacteria;D_1__Bacteroidetes;D_2__Bacteroidia;D_3__Bacteroidales;D_4__Prevotellaceae;D_5__Prevotella 9	0.0319305	0.109799	0.00255696	0.088054	0	0.0443955	0.129201	0.0556896	0.087721	0.0593862	0.0603251	0.040808	0.225499	0.0418819	0.0718155	0.102197	0.0891745	0.153544	0	0.0938404	0	0	0.0381363	0.00276549	0	0.100473	0.0105423	0	0.0244236	0	0	0.104357	0	0	0	0	0	0	0	0	0	0	0	0.267623	0	0	0	0
D_0__Bacteria;D_1__Bacteroidetes;D_2__Bacteroidia;D_3__Bacteroidales;D_4__Prevotellaceae;D_5__Prevotellaceae UCG-001	0	0	0	0	0	0	0.0313214	0	0	0	0	0.0336066	0	0	0	0	0	0	0	0	0	0	0	0	0	0	0	0	0	0	0	0	0	0	0	0	0	0	0	0	0	0	0	0	0	0	0	0
D_0__Bacteria;D_1__Bacteroidetes;D_2__Bacteroidia;D_3__Bacteroidales;D_4__Prevotellaceae;__	0.0447027	0	0	0	0	0	0.0156607	0.0686839	0	0	0	0.020404	0	0	0	0	0	0	0	0	0	0	0.0201898	0.0207412	0	0.00772869	0	0	0	0	0	0	0	0	0	0	0	0	0	0.0581798	0.0110263	0	0	0	0	0	0	0
D_0__Bacteria;D_1__Bacteroidetes;D_2__Bacteroidia;D_3__Bacteroidales;D_4__Prolixibacteraceae;D_5__BSV13	0	0	0	0	0	0	0	0	0	0	0	0	0	0	0.00973769	0	0.0042464	0	0	0	0	0	0	0	0	0	0	0	0	0	0	0	0	0	0	0	0	0	0	0	0	0	0	0	0	0	0	0
D_0__Bacteria;D_1__Bacteroidetes;D_2__Bacteroidia;D_3__Bacteroidales;D_4__Prolixibacteraceae;D_5__Roseimarinus	0	0	0	0	0	0	0	0	0	0	0	0	0	0	0	0	0.00566187	0	0	0	0	0.0479083	0	0	0	0	0	0	0	0	0	0	0	0	0	0	0	0	0	0	0	0	0	0	0	0	0	0
D_0__Bacteria;D_1__Bacteroidetes;D_2__Bacteroidia;D_3__Bacteroidales;D_4__Rikenellaceae;D_5__Rikenella	0	0.00946539	0	0	0	0	0	0	0	0	0	0	0	0	0	0	0	0	0	0	0	0	0	0	0	0	0	0	0	0	0	0	0	0	0	0	0	0	0	0	0	0	0	0	0	0	0	0
D_0__Bacteria;D_1__Bacteroidetes;D_2__Bacteroidia;D_3__Bacteroidales;D_4__Rikenellaceae;D_5__Rikenellaceae RC9 gut group	0.0399131	0.00283962	0	0.0110068	0	0	0.00652529	0	0	0.00629853	0.0305757	0	0	0.0122156	0.00608606	0	0.00566187	0	0	0	0	0	0.0471095	0.0110619	0	0	0	0	0	0	0	0	0	0	0	0	0	0	0	0	0	0	0	0	0	0	0	0
D_0__Bacteria;D_1__Bacteroidetes;D_2__Bacteroidia;D_3__Bacteroidales;D_4__uncultured;Ambiguous_taxa	0	0	0	0	0	0	0	0	0	0	0	0	0	0	0	0	0	0	0	0	0	0	0	0	0.0193663	0	0	0	0	0	0	0	0	0	0	0	0	0	0	0	0	0	0	0.0139934	0	0	0	0
D_0__Bacteria;D_1__Bacteroidetes;D_2__Bacteroidia;D_3__Bacteroidales;__;__	0	0	0	0.0476959	0	0.0159824	0.0482871	0	0.102977	0.0287933	0.064457	0.040808	0.0498699	0.043627	0.017041	0	0.0566187	0.125506	0	0	0	0	0	0.128595	0	0.0525551	0	0	0.0439625	0	0.116078	0	0	0	0	0	0	0	0	0	0	0	0	0	0	0	0	0
D_0__Bacteria;D_1__Bacteroidetes;D_2__Bacteroidia;D_3__Chitinophagales;D_4__37-13;D_5__metagenome	0	0	0	0	0	0	0	0	0	0	0	0	0	0	0	0	0	0	0	0	0	0	0	0	0	0	0	0	0	0	0	0	0	0	0	0	0	0	0	0	0	0	0	0	0	0	0	0
D_0__Bacteria;D_1__Bacteroidetes;D_2__Bacteroidia;D_3__Chitinophagales;D_4__Chitinophagaceae;D_5__Ferruginibacter	0	0	0	0	0	0	0	0	0	0	0	0	0	0	0	0	0.00283094	0	0	0	0	0	0	0	0	0	0	0	0	0	0.0307962	0	0	0	0	0	0	0	0	0	0	0	0	0	0	0	0	0
D_0__Bacteria;D_1__Bacteroidetes;D_2__Bacteroidia;D_3__Chitinophagales;D_4__Chitinophagaceae;D_5__Sediminibacterium	0	0.0747766	0	0	0	0	0.0313214	0	0	0	0	0	0	0	0	0	0	0	0.00348502	0	0	0.0463628	0	0	0	0	0	0	0.0537319	0	0	0	0	0	0.0350866	0.0122397	0	0	0	0	0	0	0	0	0	0	0	0
D_0__Bacteria;D_1__Bacteroidetes;D_2__Bacteroidia;D_3__Chitinophagales;D_4__Chitinophagaceae;D_5__Segetibacter	0	0	0	0	0	0	0	0	0	0	0	0	0	0	0	0	0	0	0	0	0	0	0	0	0	0	0	0	0	0	0	0	0	0	0	0	0	0	0	0	0	0	0	0	0	0	0	0
D_0__Bacteria;D_1__Bacteroidetes;D_2__Bacteroidia;D_3__Chitinophagales;D_4__Chitinophagaceae;D_5__Terrimonas	0	0	0	0	0	0	0	0	0	0	0	0	0	0	0	0	0	0	0	0	0	0	0	0	0	0	0	0	0	0	0	0	0.0101984	0	0	0	0	0	0	0	0	0	0	0	0	0	0	0
D_0__Bacteria;D_1__Bacteroidetes;D_2__Bacteroidia;D_3__Chitinophagales;D_4__Chitinophagaceae;D_5__uncultured	0.0175618	0	0.0715948	0	0.0297784	0.0248615	0.067863	0.0148506	0.00953489	0.0296931	0	0.0276054	0.214657	0	0.00486885	0.00393066	0.0268939	0.0200275	0	0.0309577	0	0.143725	0	0.0636062	0.00829983	0.071104	0.00567661	0	0.0195389	0.0337543	0.0663303	0.0702402	0.0535414	0.116542	0	0.0469187	0.0583431	0.0167763	0.0271694	0.0260806	0.0689142	0	0	0.0437292	0.0749991	0.05552	0.00920707	0.0508462
D_0__Bacteria;D_1__Bacteroidetes;D_2__Bacteroidia;D_3__Chitinophagales;D_4__Chitinophagaceae;__	0	0	0.00681855	0	0	0.0461713	0	0	0	0	0	0	0	0	0	0	0	0	0	0	0	0	0	0	0	0	0	0	0	0	0	0	0	0	0	0	0	0	0	0	0	0	0	0	0	0	0	0
D_0__Bacteria;D_1__Bacteroidetes;D_2__Bacteroidia;D_3__Chitinophagales;D_4__Saprospiraceae;D_5__Aureispira	0	0	0	0	0	0	0	0.0129942	0	0	0	0	0	0	0	0	0	0	0	0	0	0	0	0.0470133	0	0	0	0	0	0	0	0	0	0	0	0	0	0	0	0	0	0	0	0	0	0	0	0
D_0__Bacteria;D_1__Bacteroidetes;D_2__Bacteroidia;D_3__Chitinophagales;D_4__Saprospiraceae;D_5__Phaeodactylibacter	0	0	0	0	0	0	0	0	0	0	0	0	0	0	0	0	0	0	0	0	0	0	0	0	0	0	0	0.0180867	0	0	0	0	0	0	0	0	0	0	0	0	0	0	0	0	0	0	0	0
D_0__Bacteria;D_1__Bacteroidetes;D_2__Bacteroidia;D_3__Chitinophagales;D_4__Saprospiraceae;D_5__uncultured	0.00478958	0	0.0332404	0	0	0	0.00391517	0	0.00572093	0.060286	0.0429713	0.0192038	0	0.00872539	0	0.0196533	0	0	0.0139401	0.0290228	0	0.0788168	0	0.0096792	0	0.0139116	0.00810945	0.00193786	0.087925	0.00843858	0	0	0.0573658	0	0	0.0652781	0.0666778	0	0.0125397	0	0	0.0349571	0	0.162673	0.0449994	0	0	0.0145275
D_0__Bacteria;D_1__Bacteroidetes;D_2__Bacteroidia;D_3__Chitinophagales;D_4__Saprospiraceae;__	0	0	0.00937551	0	0	0	0	0	0	0	0	0	0	0	0	0	0	0	0	0	0	0	0.0157032	0	0	0	0	0	0	0	0	0	0	0	0	0	0	0	0	0	0	0	0	0	0	0	0	0
D_0__Bacteria;D_1__Bacteroidetes;D_2__Bacteroidia;D_3__Chitinophagales;D_4__uncultured;D_5__metagenome	0	0.0558458	0	0	0	0	0.00783034	0.0185632	0	0	0	0.00360071	0.127927	0.0331565	0	0	0.0254784	0	0	0	0	0	0.029163	0.0373341	0.0156775	0	0	0.0452167	0	0.149082	0	0.0220755	0	0	0	0	0.00833472	0	0	0	0	0.0192264	0	0	0	0	0.00306902	0.0305077
D_0__Bacteria;D_1__Bacteroidetes;D_2__Bacteroidia;D_3__Chitinophagales;D_4__uncultured;D_5__uncultured bacterium	0	0	0.00767087	0	0	0	0	0	0	0	0	0.00600118	0	0	0.0158237	0	0	0	0	0.00386971	0	0.00463628	0	0.00829646	0	0	0	0.0122731	0	0	0.0734371	0	0.0242211	0	0	0.00611983	0	0	0	0.0090279	0	0	0	0	0	0	0.00204601	0
D_0__Bacteria;D_1__Bacteroidetes;D_2__Bacteroidia;D_3__Chitinophagales;D_4__uncultured;__	0.00957916	0	0	0	0	0	0	0	0.0190698	0	0	0	0	0.00698032	0	0	0	0	0.0487903	0	0	0	0	0	0	0	0	0	0	0	0	0	0	0	0	0.0428388	0	0	0	0	0	0	0	0	0	0	0	0
D_0__Bacteria;D_1__Bacteroidetes;D_2__Bacteroidia;D_3__Chitinophagales;__;__	0	0	0	0	0	0	0	0	0	0	0	0	0	0	0	0	0	0	0	0.0773941	0	0	0.0134599	0	0	0.00618295	0.00973133	0	0	0	0	0.0260892	0	0	0	0	0	0	0	0	0	0	0	0	0	0	0	0
D_0__Bacteria;D_1__Bacteroidetes;D_2__Bacteroidia;D_3__Cytophagales;D_4__Cyclobacteriaceae;D_5__Marinoscillum	0	0	0	0	0	0	0	0	0	0	0	0	0	0	0	0	0	0	0	0	0	0.0139089	0	0.0221239	0	0	0	0	0	0	0	0	0	0	0	0	0	0	0	0	0	0	0	0	0	0	0	0
D_0__Bacteria;D_1__Bacteroidetes;D_2__Bacteroidia;D_3__Cytophagales;D_4__Cyclobacteriaceae;D_5__uncultured	0	0	0	0	0	0	0	0	0	0	0	0	0	0	0	0	0	0	0	0	0	0	0	0	0	0	0	0	0	0	0	0	0	0	0	0	0	0	0	0.0110341	0	0	0	0	0	0	0	0
D_0__Bacteria;D_1__Bacteroidetes;D_2__Bacteroidia;D_3__Cytophagales;D_4__Cyclobacteriaceae;__	0	0	0	0	0	0	0	0.0129942	0	0	0	0	0	0	0	0	0	0	0	0.0541759	0	0	0	0	0	0	0	0	0	0	0	0	0	0	0	0	0	0	0	0	0	0	0	0	0.0149998	0	0	0
D_0__Bacteria;D_1__Bacteroidetes;D_2__Bacteroidia;D_3__Cytophagales;D_4__Cytophagaceae;D_5__Cytophaga	0	0	0	0	0	0	0	0	0	0	0	0	0	0	0	0	0	0	0	0	0	0	0	0	0	0.00772869	0	0	0	0	0	0.0240824	0	0	0	0	0	0	0	0	0	0	0	0	0	0	0	0
D_0__Bacteria;D_1__Bacteroidetes;D_2__Bacteroidia;D_3__Cytophagales;D_4__Hymenobacteraceae;D_5__Hymenobacter	0.0558784	0	0	0	0	0.00355164	0	0.0111379	0.0266977	0	0.0132219	0	0	0	0	0	0	0	0.0200389	0	0	0.114362	0.0224331	0.0359513	0	0.171577	0	0	0.0439625	0.244719	0	0.0180618	0	0.00392837	0.0510351	0.0489586	0	0	0.0041799	0.0060186	0	0	0	0.0297359	0	0	0	0.005811
D_0__Bacteria;D_1__Bacteroidetes;D_2__Bacteroidia;D_3__Cytophagales;D_4__MWH-CFBk5;D_5__uncultured compost bacterium	0	0	0	0	0	0	0	0	0	0	0	0	0	0	0	0	0	0	0	0	0	0	0	0	0	0	0	0	0	0	0	0	0	0	0	0	0	0	0	0	0	0	0	0	0	0	0	0
D_0__Bacteria;D_1__Bacteroidetes;D_2__Bacteroidia;D_3__Cytophagales;D_4__Microscillaceae;D_5__uncultured	0	0	0	0	0	0	0	0	0	0	0	0	0	0	0	0	0	0	0.0148113	0	0	0	0	0	0	0	0	0	0	0	0	0	0	0	0	0	0	0	0	0	0	0	0	0	0	0	0	0
D_0__Bacteria;D_1__Bacteroidetes;D_2__Bacteroidia;D_3__Cytophagales;D_4__Spirosomaceae;D_5__Arcicella	0	0	0	0	0	0	0	0	0	0	0	0	0	0	0	0	0	0	0	0	0	0	0	0	0	0	0	0	0	0	0	0	0	0	0	0	0	0	0	0	0	0	0	0	0	0	0	0
D_0__Bacteria;D_1__Bacteroidetes;D_2__Bacteroidia;D_3__Cytophagales;D_4__Spirosomaceae;D_5__Dyadobacter	0	0	0	0	0	0	0	0	0	0	0	0	0	0	0	0	0	0	0	0	0	0.0556354	0	0.0096792	0	0.0340062	0	0	0	0	0	0	0	0	0	0	0	0	0	0	0	0	0	0	0	0	0	0
D_0__Bacteria;D_1__Bacteroidetes;D_2__Bacteroidia;D_3__Cytophagales;D_4__Spirosomaceae;D_5__Emticicia	0	0	0	0	0	0	0	0	0	0	0	0	0	0	0	0	0	0	0	0	0	0	0	0	0	0	0	0	0	0	0	0	0	0	0	0	0	0	0	0	0	0	0	0	0	0	0	0
D_0__Bacteria;D_1__Bacteroidetes;D_2__Bacteroidia;D_3__Cytophagales;D_4__Spirosomaceae;D_5__Flectobacillus	0	0	0	0	0	0	0	0	0	0	0	0	0	0	0	0	0	0	0	0.0251531	0	0.0139089	0	0	0	0	0	0	0	0	0	0	0	0	0	0	0	0	0	0	0	0	0	0	0	0	0	0
D_0__Bacteria;D_1__Bacteroidetes;D_2__Bacteroidia;D_3__Cytophagales;D_4__Spirosomaceae;D_5__Lacihabitans	0	0.0160912	0	0	0	0	0	0	0	0	0.0140483	0	0	0	0	0	0	0	0.0191676	0	0	0	0	0.00276549	0	0	0	0	0	0	0.0331651	0	0	0	0	0	0	0	0	0	0	0	0	0	0	0	0	0
D_0__Bacteria;D_1__Bacteroidetes;D_2__Bacteroidia;D_3__Cytophagales;D_4__Spirosomaceae;D_5__Pseudarcicella	0.00478958	0.012305	0.056253	0	0	0.0106549	0.00261011	0.0129942	0	0	0	0	0.134432	0.0104705	0.0279959	0.0137573	0	0.185588	0.0209101	0.0822313	0	0.0355448	0	0.00691372	0.00553322	0.0772869	0.00243283	0.00387572	0	0.0450058	0.108971	0.0180618	0.00509918	0	0	0.116277	0	0.0117434	0.0229895	0.0983038	0	0.00873927	0.00369257	0.115445	0	0.00504728	0.00613804	0.228082
D_0__Bacteria;D_1__Bacteroidetes;D_2__Bacteroidia;D_3__Cytophagales;D_4__Spirosomaceae;D_5__Rudanella	0	0	0	0	0	0	0	0	0	0	0	0	0	0	0	0	0	0	0	0	0	0	0	0	0	0	0	0	0	0	0	0	0.0318699	0	0	0	0	0	0	0	0	0	0	0	0	0	0	0
D_0__Bacteria;D_1__Bacteroidetes;D_2__Bacteroidia;D_3__Cytophagales;D_4__Spirosomaceae;D_5__uncultured	0	0	0	0	0	0	0	0	0	0	0	0	0	0	0	0	0.021232	0	0	0	0	0	0	0	0	0	0	0	0	0	0	0	0	0	0	0	0	0	0	0	0	0	0	0	0	0	0	0
D_0__Bacteria;D_1__Bacteroidetes;D_2__Bacteroidia;D_3__Cytophagales;D_4__Spirosomaceae;__	0	0	0	0	0	0	0	0	0	0	0	0	0	0	0	0	0	0	0	0	0	0	0	0	0	0	0	0	0	0	0	0	0	0	0	0	0	0	0	0	0	0	0	0	0	0	0	0
D_0__Bacteria;D_1__Bacteroidetes;D_2__Bacteroidia;D_3__Cytophagales;__;__	0	0	0	0	0	0	0	0	0	0	0	0	0	0	0	0	0	0	0	0	0	0	0	0	0	0	0	0	0	0	0	0	0	0	0	0	0	0	0	0	0	0	0	0	0	0	0	0
D_0__Bacteria;D_1__Bacteroidetes;D_2__Bacteroidia;D_3__Flavobacteriales;D_4__Crocinitomicaceae;D_5__Fluviicola	0.0143687	0.00851886	0.0869365	0	0.0255243	0	0.0508972	0.0259885	0.00762791	0.00629853	0.0231384	0	0	0.0314114	0.0109549	0.02948	0.00990828	0	0.0095838	0.0280554	0	0.0139089	0.0224331	0	0	0.146845	0	0.040695	0	0.0534443	0	0.0742539	0.0420682	0	0	0	0.0250042	0.0201315	0	0.0341054	0	0	0	0.0262375	0.0562493	0.0487903	0.00920707	0.0159802
D_0__Bacteria;D_1__Bacteroidetes;D_2__Bacteroidia;D_3__Flavobacteriales;D_4__Cryomorphaceae;D_5__uncultured	0	0	0	0	0.0382865	0.0284131	0.0195759	0.00742528	0	0.0539874	0.0140483	0	0	0	0	0	0.0169856	0.16289	0.0487903	0.059013	0.18621	0.086544	0.0964623	0.0677544	0.0193663	0.0958358	0	0.102061	0.0537319	0.0871987	0.151612	0.303036	0	0	0	0.320271	0	0.0385854	0.0208995	0	0.0399702	0	0	0.0962043	0	0	0	0.023244
D_0__Bacteria;D_1__Bacteroidetes;D_2__Bacteroidia;D_3__Flavobacteriales;D_4__Flavobacteriaceae;D_5__Algibacter	0	0	0	0	0	0	0	0	0	0	0	0	0	0	0	0	0	0	0	0	0	0	0	0	0	0	0	0	0	0	0	0	0	0	0	0	0	0	0	0	0	0	0	0	0	0	0	0
D_0__Bacteria;D_1__Bacteroidetes;D_2__Bacteroidia;D_3__Flavobacteriales;D_4__Flavobacteriaceae;D_5__Aurantivirga	0	0	0	0	0	0	0	0	0	0	0	0	0	0	0	0	0	0.0627528	0.0113263	0	0	0.010818	0.0224331	0.0235066	0.00461101	0.0309148	0.0072985	0.0742846	0	0.0843858	0.0426409	0	0	0	0	0	0	0	0	0	0	0	0	0	0	0.0100946	0	0
D_0__Bacteria;D_1__Bacteroidetes;D_2__Bacteroidia;D_3__Flavobacteriales;D_4__Flavobacteriaceae;D_5__Capnocytophaga	0	0	0	0	0	0	0	0	0	0	0	0	0	0	0.00852048	0	0	0	0	0	0	0	0	0	0	0	0	0	0	0	0	0	0	0	0	0	0	0	0	0	0	0	0	0	0	0	0	0
D_0__Bacteria;D_1__Bacteroidetes;D_2__Bacteroidia;D_3__Flavobacteriales;D_4__Flavobacteriaceae;D_5__Dokdonia	0.030334	0	0	0	0	0	0	0	0	0	0	0	0	0	0	0	0	0	0	0	0	0	0	0	0	0	0	0	0	0	0	0	0	0	0	0	0	0	0	0	0	0	0	0	0	0	0	0
D_0__Bacteria;D_1__Bacteroidetes;D_2__Bacteroidia;D_3__Flavobacteriales;D_4__Flavobacteriaceae;D_5__Flavobacterium	0	0.0558458	0.0332404	0.0733783	0.0510486	0.0088791	0.169657	0.0445517	0.0266977	0.0296931	0.0388394	0.0996195	0.0585429	0	0	0	0	0	0.104551	0.0744919	0.104058	0	0.0224331	0.053927	0.0313549	0.00309148	0	0.157613	0	0.188462	0.0118447	0.0200686	0.0764877	0	0	0.00815977	0	0	0.0271694	0.0310961	0.0206743	0	0	0.0647193	0	0.0723443	0	0
D_0__Bacteria;D_1__Bacteroidetes;D_2__Bacteroidia;D_3__Flavobacteriales;D_4__Flavobacteriaceae;D_5__Formosa	0.00478958	0	0	0	0.0127622	0.0230857	0	0	0	0.0260939	0	0	0	0.00349016	0	0	0	0	0.0339789	0	0	0	0	0.0110619	0	0.0170031	0	0	0.0195389	0	0	0	0.00892356	0	0	0.0387589	0.0291715	0	0	0	0	0.02447	0	0	0.0374995	0	0	0
D_0__Bacteria;D_1__Bacteroidetes;D_2__Bacteroidia;D_3__Flavobacteriales;D_4__Flavobacteriaceae;D_5__Gelidibacter	0	0	0	0	0	0	0	0	0	0	0	0	0	0	0	0	0	0	0	0	0	0	0	0	0	0	0	0	0	0	0	0	0	0	0	0	0	0	0	0	0	0	0	0	0	0	0	0
D_0__Bacteria;D_1__Bacteroidetes;D_2__Bacteroidia;D_3__Flavobacteriales;D_4__Flavobacteriaceae;D_5__Lacinutrix	0.0207548	0	0	0	0	0	0	0	0	0	0	0	0	0	0	0	0	0	0	0	0	0	0	0	0	0	0	0	0	0	0	0	0	0	0.0510351	0	0	0	0	0	0	0	0	0	0	0	0	0
D_0__Bacteria;D_1__Bacteroidetes;D_2__Bacteroidia;D_3__Flavobacteriales;D_4__Flavobacteriaceae;D_5__Myroides	0	0	0.00852319	0	0	0	0	0	0	0	0	0	0.00867303	0	0.00730327	0	0	0	0	0.00677199	0	0.0525445	0	0.0331858	0.00829983	0	0	0	0	0	0	0	0	0	0	0	0	0	0.0125397	0	0	0	0	0	0	0	0	0
D_0__Bacteria;D_1__Bacteroidetes;D_2__Bacteroidia;D_3__Flavobacteriales;D_4__Flavobacteriaceae;D_5__NS2b marine group	0	0	0	0	0	0	0	0	0	0	0	0	0	0	0	0	0	0	0	0	0	0	0	0	0	0	0	0	0	0	0	0	0	0	0	0	0	0	0	0	0	0	0	0	0	0	0	0
D_0__Bacteria;D_1__Bacteroidetes;D_2__Bacteroidia;D_3__Flavobacteriales;D_4__Flavobacteriaceae;D_5__NS3a marine group	0	0	0	0	0	0	0	0	0	0.00719832	0.00330548	0	0	0	0.0206926	0.023584	0	0	0	0	0	0	0	0	0	0	0	0	0	0	0	0	0.0140227	0.0209513	0	0.240713	0	0.0201315	0	0.0270837	0.0303222	0	0	0	0	0.0151418	0.00511504	0.0319605
D_0__Bacteria;D_1__Bacteroidetes;D_2__Bacteroidia;D_3__Flavobacteriales;D_4__Flavobacteriaceae;D_5__NS4 marine group	0	0	0	0	0	0	0	0	0.00953489	0.0431899	0	0	0.0173461	0	0	0.00982666	0	0	0	0	0	0	0	0.00414823	0.00829983	0	0	0	0	0	0	0	0	0	0	0.0469187	0	0	0	0	0	0	0	0	0	0.0370134	0	0.0334132
D_0__Bacteria;D_1__Bacteroidetes;D_2__Bacteroidia;D_3__Flavobacteriales;D_4__Flavobacteriaceae;D_5__NS5 marine group	0.00478958	0.00567924	0	0.0110068	0	0.0177582	0	0	0.0152558	0.0575866	0.00826371	0	0	0	0	0	0	0	0	0	0	0	0	0.0165929	0	0.0200946	0	0	0	0	0.0307962	0.0401373	0.00382438	0	0	0.34475	0	0	0	0	0.0165394	0.0104871	0.00738514	0.0577226	0	0	0	0.0145275
D_0__Bacteria;D_1__Bacteroidetes;D_2__Bacteroidia;D_3__Flavobacteriales;D_4__Flavobacteriaceae;D_5__Polaribacter 1	0	0.0141981	0	0	0	0	0	0.0092816	0	0.00539874	0.0272702	0	0	0	0	0	0	0	0	0	0	0.00927257	0	0	0	0	0	0	0	0	0	0	0	0	0	0	0.0625104	0	0	0	0	0	0	0	0	0	0	0
D_0__Bacteria;D_1__Bacteroidetes;D_2__Bacteroidia;D_3__Flavobacteriales;D_4__Flavobacteriaceae;D_5__Polaribacter 2	0	0	0	0	0	0	0	0	0	0	0	0	0	0	0	0	0	0	0	0	0	0	0	0.0525442	0	0.0571923	0	0	0	0	0.0663303	0.0100343	0	0	0	0	0	0.00838814	0	0	0	0	0	0	0	0	0.00306902	0
D_0__Bacteria;D_1__Bacteroidetes;D_2__Bacteroidia;D_3__Flavobacteriales;D_4__Flavobacteriaceae;D_5__Polaribacter 3	0	0	0	0	0	0	0	0	0	0	0	0	0	0	0	0	0.021232	0	0.0104551	0.0145114	0	0	0.0471095	0.0622235	0	0.035552	0	0	0	0	0	0.0160549	0	0	0	0	0	0	0	0	0	0	0	0	0	0	0	0
D_0__Bacteria;D_1__Bacteroidetes;D_2__Bacteroidia;D_3__Flavobacteriales;D_4__Flavobacteriaceae;D_5__Tenacibaculum	0	0	0	0	0	0	0	0	0	0	0	0	0	0	0	0	0	0	0	0	0	0	0	0	0	0	0	0	0	0	0	0	0	0	0	0	0	0	0	0	0	0	0	0	0	0	0	0
D_0__Bacteria;D_1__Bacteroidetes;D_2__Bacteroidia;D_3__Flavobacteriales;D_4__Flavobacteriaceae;D_5__Ulvibacter	0	0	0	0	0	0	0	0.0111379	0	0	0	0	0	0	0	0	0	0.0133517	0	0	0.0383373	0	0	0.0373341	0	0.10511	0	0	0	0	0	0.0100343	0	0	0.0127588	0.0285592	0	0	0.0188096	0	0.0110263	0	0	0	0	0	0	0.023244
D_0__Bacteria;D_1__Bacteroidetes;D_2__Bacteroidia;D_3__Flavobacteriales;D_4__Flavobacteriaceae;__	0	0	0	0	0	0	0	0.00742528	0	0.00989769	0	0	0	0	0	0	0.00990828	0.0453957	0.0496615	0.134472	0	0.0509991	0.109922	0.224004	0.0599432	0.15612	0	0.103998	0.0439625	0	0.0473788	0.162556	0	0	0	0.0509986	0	0	0	0	0	0	0	0	0	0	0	0
D_0__Bacteria;D_1__Bacteroidetes;D_2__Bacteroidia;D_3__Flavobacteriales;D_4__NS7 marine group;Ambiguous_taxa	0	0	0	0	0	0	0	0	0	0	0	0	0	0	0	0	0	0	0	0	0	0	0	0	0	0	0	0	0	0	0	0	0	0	0	0	0	0	0	0	0	0	0	0	0.0562493	0	0	0
D_0__Bacteria;D_1__Bacteroidetes;D_2__Bacteroidia;D_3__Flavobacteriales;D_4__NS9 marine group;Ambiguous_taxa	0	0	0	0	0	0	0	0	0	0	0	0	0	0	0	0	0	0	0	0	0	0	0	0	0	0	0	0	0	0	0	0	0	0.0104757	0	0.0938373	0	0	0.0376191	0	0	0	0	0	0	0.00841213	0	0
D_0__Bacteria;D_1__Bacteroidetes;D_2__Bacteroidia;D_3__Flavobacteriales;D_4__NS9 marine group;D_5__hydrothermal vent metagenome	0	0	0	0	0	0	0	0	0	0	0	0	0	0	0	0	0	0	0	0	0	0	0	0	0	0	0	0	0	0	0	0	0	0	0	0.0407988	0	0.00671051	0	0	0	0	0	0	0	0	0	0
D_0__Bacteria;D_1__Bacteroidetes;D_2__Bacteroidia;D_3__Flavobacteriales;D_4__NS9 marine group;D_5__metagenome	0	0	0	0	0	0	0.0261011	0	0	0	0	0	0	0	0	0	0	0	0	0	0	0	0	0	0	0	0	0	0	0	0	0.0842883	0	0	0	0	0	0	0	0	0	0	0	0.0349834	0	0	0	0
D_0__Bacteria;D_1__Bacteroidetes;D_2__Bacteroidia;D_3__Flavobacteriales;D_4__NS9 marine group;D_5__uncultured Bacteroidetes bacterium	0	0	0	0	0	0	0	0	0	0.00179958	0	0	0	0	0	0	0	0	0	0	0.087628	0	0.0381363	0	0	0	0	0	0	0	0	0	0.0216715	0	0	0	0	0	0	0	0	0	0	0	0.0374995	0	0	0
D_0__Bacteria;D_1__Bacteroidetes;D_2__Bacteroidia;D_3__Flavobacteriales;D_4__NS9 marine group;D_5__uncultured bacterium	0	0	0	0	0	0	0	0	0	0	0	0	0	0	0	0	0	0	0	0	0	0	0	0	0	0	0	0	0	0	0	0	0	0	0	0	0	0	0	0	0	0	0	0	0	0	0	0
D_0__Bacteria;D_1__Bacteroidetes;D_2__Bacteroidia;D_3__Flavobacteriales;D_4__NS9 marine group;D_5__uncultured marine bacterium	0	0	0	0	0	0	0	0	0	0	0	0	0	0	0	0	0	0	0	0	0	0	0	0	0	0	0	0	0	0	0	0	0.0395186	0	0	0	0	0	0	0	0	0	0	0.0367326	0	0	0	0
D_0__Bacteria;D_1__Bacteroidetes;D_2__Bacteroidia;D_3__Flavobacteriales;D_4__NS9 marine group;__	0	0	0	0	0	0	0	0	0	0	0	0	0	0	0	0	0	0	0	0	0	0	0	0	0	0	0	0	0	0	0	0	0	0	0	0	0.0166694	0	0	0	0	0	0	0.0472276	0	0.0067297	0	0
D_0__Bacteria;D_1__Bacteroidetes;D_2__Bacteroidia;D_3__Flavobacteriales;D_4__Weeksellaceae;D_5__Chryseobacterium	0.0111757	0.012305	0.0809703	0.0513648	0.0170162	0.0266373	0.0261011	0.0891034	0.0533954	0.0179958	0	0.0312061	0.0520382	0.0540974	0.0742499	0.0845093	0.0693579	0	0.0209101	0.0415993	0.0711978	0.12518	0.0560827	0.0497788	0	0.0309148	0	0	0.0439625	0.0253157	0.0284273	0.058199	0	0	0	0.0530385	0.0333389	0	0	0	0	0	0	0.0944551	0	0	0	0
D_0__Bacteria;D_1__Bacteroidetes;D_2__Bacteroidia;D_3__Flavobacteriales;D_4__Weeksellaceae;D_5__Cloacibacterium	0	0	0	0	0.0297784	0.0443955	0.0247961	0	0	0.017096	0.0115692	0.0156031	0	0	0.040168	0.0550293	0	0	0.0165538	0.0773941	0	0	0	0	0	0	0	0	0	0	0	0.0220755	0	0	0	0	0	0	0	0	0	0	0	0	0	0	0	0
D_0__Bacteria;D_1__Bacteroidetes;D_2__Bacteroidia;D_3__Flavobacteriales;D_4__Weeksellaceae;D_5__Elizabethkingia	0	0	0	0	0	0	0	0	0	0	0	0	0	0	0	0	0	0	0	0	0	0	0	0	0.00645542	0	0	0	0	0	0	0.0240824	0	0	0	0	0	0	0	0	0	0	0	0	0	0	0	0
D_0__Bacteria;D_1__Bacteroidetes;D_2__Bacteroidia;D_3__Flavobacteriales;D_4__Weeksellaceae;D_5__Empedobacter	0	0.0179842	0	0.0110068	0	0	0	0	0	0	0	0.00960188	0.0477016	0	0.0279959	0.02948	0	0	0	0	0	0	0	0	0	0	0	0	0	0	0.0284273	0	0	0	0	0.00611983	0	0	0	0	0	0	0	0	0	0	0	0
D_0__Bacteria;D_1__Bacteroidetes;D_2__Bacteroidia;D_3__Flavobacteriales;D_4__Weeksellaceae;D_5__Moheibacter	0	0	0	0	0	0	0	0	0	0	0	0	0	0	0	0	0	0	0	0.0222508	0	0	0	0	0	0	0	0	0	0	0.0118447	0.0120412	0	0	0	0	0	0	0	0	0	0	0	0	0	0	0	0
D_0__Bacteria;D_1__Bacteroidetes;D_2__Bacteroidia;D_3__Flavobacteriales;D_4__Weeksellaceae;D_5__Weeksella	0	0	0	0	0	0	0	0	0	0	0	0	0	0	0	0.00982666	0	0	0	0	0	0	0	0	0	0	0	0	0	0	0	0.0180618	0	0	0	0	0	0	0	0	0	0	0	0	0	0	0	0
D_0__Bacteria;D_1__Bacteroidetes;D_2__Bacteroidia;D_3__Flavobacteriales;__;__	0	0	0	0	0	0	0	0	0	0	0	0	0	0	0	0	0	0	0	0	0	0	0	0	0	0	0	0	0	0	0	0	0.0254959	0	0	0	0	0	0	0	0	0	0	0	0	0	0	0
D_0__Bacteria;D_1__Bacteroidetes;D_2__Bacteroidia;D_3__Sphingobacteriales;D_4__AKYH767;Ambiguous_taxa	0	0	0	0	0	0	0	0	0	0	0	0	0	0	0	0	0	0	0	0	0	0	0	0	0	0	0	0	0	0	0	0	0	0	0	0	0	0	0	0	0	0	0	0.0297359	0	0	0	0
D_0__Bacteria;D_1__Bacteroidetes;D_2__Bacteroidia;D_3__Sphingobacteriales;D_4__KD3-93;D_5__uncultured bacterium	0	0	0	0	0	0	0	0	0	0	0	0	0	0	0	0	0	0	0	0	0	0	0	0	0	0	0	0	0	0	0	0	0.00764877	0	0	0	0	0	0.0104498	0	0	0	0	0	0	0	0	0
D_0__Bacteria;D_1__Bacteroidetes;D_2__Bacteroidia;D_3__Sphingobacteriales;D_4__LiUU-11-161;D_5__metagenome	0	0	0	0	0	0	0	0	0	0	0	0	0	0	0	0	0	0	0	0	0	0	0	0	0	0	0	0	0	0	0	0	0	0	0	0	0	0	0	0	0	0	0	0	0	0	0	0
D_0__Bacteria;D_1__Bacteroidetes;D_2__Bacteroidia;D_3__Sphingobacteriales;D_4__NS11-12 marine group;Ambiguous_taxa	0.00957916	0	0.0119325	0	0	0	0	0	0	0.00269937	0	0.0108021	0	0.0191959	0	0	0	0	0	0.00290228	0	0.0401811	0	0.0235066	0	0.00618295	0	0	0	0	0	0.0160549	0.00509918	0	0	0	0	0	0	0.0391209	0.00413485	0.0192264	0	0	0	0	0	0.0566572
D_0__Bacteria;D_1__Bacteroidetes;D_2__Bacteroidia;D_3__Sphingobacteriales;D_4__NS11-12 marine group;D_5__metagenome	0	0	0	0	0	0	0	0	0	0	0	0	0.0173461	0	0	0.00589599	0	0	0	0	0	0	0	0	0	0	0	0	0	0	0	0	0	0	0	0	0	0	0	0	0	0	0	0	0	0	0	0
D_0__Bacteria;D_1__Bacteroidetes;D_2__Bacteroidia;D_3__Sphingobacteriales;D_4__NS11-12 marine group;D_5__uncultured Cytophagales bacterium	0	0.0227169	0.0196033	0	0	0	0	0	0	0	0	0	0	0	0	0	0	0	0	0	0	0	0	0	0	0	0	0	0	0	0.00947575	0	0	0	0	0	0	0	0	0.0230713	0	0	0	0.00524751	0.0262497	0	0	0
D_0__Bacteria;D_1__Bacteroidetes;D_2__Bacteroidia;D_3__Sphingobacteriales;D_4__NS11-12 marine group;D_5__uncultured bacterium	0	0	0.0161941	0	0	0.0106549	0	0	0.0171628	0	0	0	0	0	0	0.00786133	0	0	0	0	0	0	0	0	0	0	0	0	0	0	0	0	0	0	0	0	0	0.00503288	0.00626985	0	0	0	0	0	0	0	0	0
D_0__Bacteria;D_1__Bacteroidetes;D_2__Bacteroidia;D_3__Sphingobacteriales;D_4__NS11-12 marine group;__	0	0	0	0	0	0	0	0	0	0	0	0	0	0	0.00730327	0	0.0226475	0.0307088	0	0.020316	0	0.0231814	0	0	0.0184441	0.0278233	0	0	0	0	0.0521166	0	0	0.00392837	0.0255175	0	0	0	0	0	0	0	0	0	0	0	0.00306902	0
D_0__Bacteria;D_1__Bacteroidetes;D_2__Bacteroidia;D_3__Sphingobacteriales;D_4__Sphingobacteriaceae;D_5__Parapedobacter	0	0	0	0	0	0	0	0	0	0	0	0	0	0	0	0	0	0	0	0	0	0	0	0	0	0	0	0	0	0	0	0	0	0	0	0	0	0	0	0	0	0	0	0	0	0	0	0
D_0__Bacteria;D_1__Bacteroidetes;D_2__Bacteroidia;D_3__Sphingobacteriales;D_4__Sphingobacteriaceae;D_5__Pedobacter	0.00798263	0	0	0	0	0.00710328	0.00783034	0.0129942	0	0.0665845	0.0239648	0	0	0.0314114	0.0121721	0	0	0	0	0.0512736	0	0.0309086	0.0807591	0.0387168	0.0212107	0.0494636	0	0.122085	0	0.0112514	0.00947575	0.044151	0	0	0	0	0	0	0	0	0	0.0104871	0	0.0157425	0	0	0.0102301	0.0246967
D_0__Bacteria;D_1__Bacteroidetes;D_2__Bacteroidia;D_3__Sphingobacteriales;D_4__Sphingobacteriaceae;D_5__Sphingobacterium	0	0	0	0	0	0.0443955	0	0.00556896	0	0	0	0	0	0	0	0	0.0353867	0	0.0304939	0.0125765	0	0	0.109922	0.0553097	0.00553322	0.0741954	0	0	0.0195389	0	0.0923886	0.0120412	0.0637397	0	0.0446557	0.0979172	0.0250042	0	0.00626985	0.0130403	0.0220525	0.0454442	0	0.0804618	0.0637492	0.0336485	0.00306902	0.309436
D_0__Bacteria;D_1__Bacteroidetes;D_2__Bacteroidia;D_3__Sphingobacteriales;D_4__Sphingobacteriaceae;__	0	0	0	0	0	0	0	0	0	0	0	0	0	0	0	0	0	0	0	0	0	0	0	0	0	0	0	0	0	0	0	0	0	0	0	0	0	0	0	0	0	0	0	0	0	0	0	0
D_0__Bacteria;D_1__Bacteroidetes;D_2__Bacteroidia;D_3__Sphingobacteriales;D_4__env.OPS 17;D_5__metagenome	0	0	0	0	0	0	0	0	0	0	0	0	0	0	0.00730327	0	0	0	0	0	0	0	0	0	0.00276661	0	0	0	0	0	0	0	0	0	0	0	0	0	0	0	0	0	0	0	0	0	0	0
D_0__Bacteria;D_1__Bacteroidetes;D_2__Bacteroidia;D_3__Sphingobacteriales;D_4__env.OPS 17;D_5__uncultured Bacteroidetes bacterium	0.0319305	0	0	0	0	0	0	0	0	0	0	0	0	0	0	0.011792	0	0	0	0	0	0	0	0	0.0221329	0	0	0	0	0	0	0	0	0	0	0	0	0	0	0	0	0	0	0	0	0	0	0
D_0__Bacteria;D_1__Bacteroidetes;D_2__Bacteroidia;D_3__Sphingobacteriales;D_4__env.OPS 17;D_5__uncultured bacterium	0	0	0	0	0	0.00532746	0	0	0.0190698	0.0179958	0.0280966	0.00960188	0	0	0.00730327	0	0	0	0	0	0	0.0278177	0	0	0	0	0	0	0.0683861	0	0.0473788	0.00602059	0	0	0	0	0	0	0	0.0120372	0.0234308	0	0	0.0594718	0	0.0185067	0	0
D_0__Bacteria;D_1__Bacteroidetes;D_2__Bacteroidia;D_3__Sphingobacteriales;D_4__env.OPS 17;__	0	0	0	0	0	0.0106549	0	0	0	0	0	0	0	0	0	0	0	0	0	0	0	0	0	0	0	0	0	0.00839739	0	0	0	0.00802745	0.00637397	0	0	0	0	0	0	0	0	0	0	0.0279867	0	0	0	0
D_0__Bacteria;D_1__Bacteroidetes;D_2__Bacteroidia;__;__;__	0.0175618	0	0	0	0	0	0	0.0092816	0.00762791	0.00179958	0	0	0	0	0.0377336	0	0	0	0.0322364	0.0116091	0.0273838	0.101998	0.058326	0.135509	0	0.0618295	0	0.00775144	0	0	0.0260583	0.0180618	0	0	0	0.0163195	0	0	0	0	0	0	0	0.108448	0	0.0100946	0.0132991	0
D_0__Bacteria;D_1__Bacteroidetes;D_2__Ignavibacteria;D_3__OPB56;Ambiguous_taxa;Ambiguous_taxa	0	0	0	0	0	0	0	0	0	0	0	0	0	0	0	0	0	0	0	0	0	0	0	0	0	0	0	0	0	0	0	0	0	0.0248797	0	0	0	0	0	0	0	0	0	0	0	0	0	0
D_0__Bacteria;D_1__Bacteroidetes;D_2__Ignavibacteria;D_3__OPB56;D_4__Candidatus Kapabacteria sp. 59-99;D_5__Candidatus Kapabacteria sp. 59-99	0	0	0	0	0	0	0	0	0	0.0116973	0	0	0	0	0	0	0	0	0	0	0	0	0	0	0	0	0	0	0	0	0	0	0	0	0	0	0	0	0	0	0	0	0	0	0	0	0	0
D_0__Bacteria;D_1__Bacteroidetes;D_2__Ignavibacteria;D_3__OPB56;D_4__metagenome;D_5__metagenome	0	0	0	0	0	0	0	0	0	0	0	0	0	0	0	0	0	0	0	0	0	0	0.0224331	0	0	0	0	0	0	0	0	0	0	0	0	0	0	0	0	0	0	0	0	0	0	0	0	0
D_0__Bacteria;D_1__Bacteroidetes;D_2__Ignavibacteria;D_3__OPB56;D_4__uncultured Chlorobi bacterium;D_5__uncultured Chlorobi bacterium	0	0	0	0	0	0	0	0	0	0	0	0	0	0	0	0	0	0	0	0	0	0	0	0	0	0	0	0	0	0	0	0	0	0	0	0.0183595	0	0	0	0	0	0	0	0	0	0	0	0
D_0__Bacteria;D_1__Bacteroidetes;D_2__Ignavibacteria;D_3__OPB56;D_4__uncultured bacterium;D_5__uncultured bacterium	0	0	0	0	0	0	0	0	0	0	0	0	0	0	0	0	0	0	0	0	0	0	0	0	0	0	0	0	0	0	0	0	0	0	0	0	0	0.00335525	0	0	0	0	0	0	0	0	0	0
D_0__Bacteria;D_1__Bacteroidetes;D_2__Ignavibacteria;D_3__OPB56;__;__	0	0	0	0	0	0	0	0	0	0	0	0	0	0	0	0	0	0	0	0	0	0	0	0	0	0	0	0	0	0	0	0	0	0	0	0	0	0	0	0	0	0	0	0	0	0	0	0
D_0__Bacteria;D_1__Bacteroidetes;__;__;__;__	0	0	0	0	0	0	0	0	0	0	0	0	0	0	0	0.023584	0	0.024033	0	0	0.065721	0	0	0	0	0	0.00567661	0	0	0	0.113709	0	0	0	0	0	0	0	0	0	0	0	0	0	0	0	0	0.0130747
D_0__Bacteria;D_1__Chloroflexi;D_2__Anaerolineae;D_3__1-20;Ambiguous_taxa;Ambiguous_taxa	0	0	0	0	0	0	0	0	0	0	0	0	0	0	0	0	0	0	0	0	0	0	0	0	0	0.00618295	0	0	0	0	0	0	0	0	0	0	0	0	0	0	0	0	0	0	0	0	0	0
D_0__Bacteria;D_1__Chloroflexi;D_2__Anaerolineae;D_3__Anaerolineales;D_4__Anaerolineaceae;D_5__uncultured	0	0	0	0	0	0	0	0	0	0	0	0	0	0	0	0	0	0	0.00697004	0	0	0	0	0	0	0	0	0	0	0	0	0	0	0	0	0	0	0	0	0	0	0	0	0.00699668	0	0	0.00409203	0
D_0__Bacteria;D_1__Chloroflexi;D_2__Anaerolineae;D_3__RBG-13-54-9;Ambiguous_taxa;Ambiguous_taxa	0	0	0	0	0	0	0	0	0	0	0	0	0	0	0	0	0	0	0	0	0	0	0	0	0	0	0	0	0	0	0	0	0	0	0	0	0	0	0	0.0040124	0	0	0	0	0	0	0	0
D_0__Bacteria;D_1__Chloroflexi;D_2__Anaerolineae;D_3__RBG-13-54-9;D_4__uncultured bacterium;D_5__uncultured bacterium	0	0.0160912	0	0	0	0	0	0	0	0	0	0	0	0	0	0	0	0	0	0	0	0	0	0	0	0	0	0	0	0	0	0	0	0	0	0	0	0	0	0	0	0	0	0	0	0	0	0
D_0__Bacteria;D_1__Chloroflexi;D_2__Anaerolineae;D_3__SBR1031;D_4__A4b;D_5__uncultured sludge bacterium S9	0	0	0	0	0	0	0	0	0	0	0	0	0	0	0	0	0	0	0	0	0	0	0	0	0	0	0	0	0	0	0	0	0	0	0	0	0	0	0	0	0	0	0	0.031485	0	0	0	0
D_0__Bacteria;D_1__Chloroflexi;D_2__Chloroflexia;D_3__Chloroflexales;D_4__Roseiflexaceae;D_5__uncultured	0	0	0	0	0	0	0	0	0	0	0	0	0	0	0	0.00786133	0	0	0	0	0	0	0	0	0	0	0	0	0	0	0	0	0	0	0	0	0	0	0	0	0.00551314	0	0	0	0	0	0	0
D_0__Bacteria;D_1__Chloroflexi;D_2__Dehalococcoidia;D_3__SAR202 clade;D_4__hydrothermal vent metagenome;D_5__hydrothermal vent metagenome	0	0	0	0	0	0.0319648	0	0	0	0	0	0	0	0	0	0	0	0	0	0	0	0	0	0	0	0	0	0	0	0	0	0	0	0	0	0	0	0	0	0	0	0	0	0	0	0	0	0
D_0__Bacteria;D_1__Cyanobacteria;D_2__Melainabacteria;D_3__Obscuribacterales;Ambiguous_taxa;Ambiguous_taxa	0	0	0	0	0	0	0	0	0	0	0	0	0	0	0	0.0314453	0	0	0	0	0	0	0	0	0	0	0	0	0	0	0	0	0	0	0	0	0	0	0	0	0	0	0	0	0	0	0	0
D_0__Bacteria;D_1__Cyanobacteria;D_2__Melainabacteria;D_3__Vampirovibrionales;D_4__uncultured bacterium;D_5__uncultured bacterium	0	0	0	0	0	0	0.00391517	0.00371264	0	0	0.0520614	0	0	0	0	0	0	0	0	0	0	0	0	0	0	0	0	0	0	0	0	0	0	0	0	0	0	0	0	0	0	0	0	0	0	0	0	0
D_0__Bacteria;D_1__Cyanobacteria;D_2__Oxyphotobacteria;D_3__Leptolyngbyales;D_4__Leptolyngbyaceae;D_5__uncultured	0	0	0	0	0	0	0	0	0	0	0.0148747	0	0	0	0.00730327	0	0	0	0	0	0	0	0	0	0	0	0	0	0	0	0	0	0	0	0	0	0	0	0	0	0	0	0	0	0	0	0	0
D_0__Bacteria;D_1__Cyanobacteria;D_2__Oxyphotobacteria;D_3__Nostocales;D_4__Chamaesiphonaceae;D_5__Chamaesiphon PCC-6605	0	0	0	0	0	0	0	0	0	0	0	0	0	0	0	0	0	0	0	0	0	0	0	0	0	0	0	0	0	0	0	0	0	0	0	0	0	0	0	0	0	0	0	0	0	0	0	0
D_0__Bacteria;D_1__Cyanobacteria;D_2__Oxyphotobacteria;D_3__Nostocales;D_4__Cyanobacteriaceae;__	0	0	0	0	0	0	0.0117455	0	0	0	0	0	0	0	0	0	0	0	0	0	0	0	0	0	0	0	0	0	0	0	0	0	0	0	0	0	0	0	0	0	0	0	0	0	0	0	0	0
D_0__Bacteria;D_1__Cyanobacteria;D_2__Oxyphotobacteria;D_3__Nostocales;D_4__Xenococcaceae;D_5__Pleurocapsa PCC-7319	0	0	0	0	0	0	0	0	0	0	0	0	0	0	0	0	0	0	0	0	0	0	0	0	0.0184441	0	0	0	0	0	0	0	0	0	0	0	0	0	0.0167196	0	0	0	0	0	0	0	0	0
D_0__Bacteria;D_1__Cyanobacteria;D_2__Oxyphotobacteria;D_3__Synechococcales;D_4__Cyanobiaceae;D_5__Cyanobium PCC-6307	0	0	0	0	0	0	0	0	0	0	0	0	0	0	0	0	0	0	0	0	0	0	0	0	0	0	0	0	0	0	0	0	0	0	0	0	0	0	0	0	0	0	0	0	0	0	0	0
D_0__Bacteria;D_1__Cyanobacteria;D_2__Oxyphotobacteria;D_3__Synechococcales;D_4__Cyanobiaceae;D_5__Synechococcus CC9902	0	0	0	0	0	0	0	0	0	0	0	0	0	0	0	0	0	0	0	0	0	0	0	0	0	0	0	0	0	0	0	0	0	0	0.0287072	0.0775178	0	0	0.0167196	0	0	0	0	0.12594	0.0374995	0	0	0
D_0__Bacteria;D_1__Cyanobacteria;D_2__Oxyphotobacteria;D_3__Synechococcales;D_4__Cyanobiaceae;__	0	0.105066	0	0	0	0	0	0	0	0	0	0	0.0455334	0	0	0	0	0	0	0	0	0	0	0	0	0	0	0	0	0	0	0	0.165723	0.130946	0.274313	0.0999572	0.0875146	0.026842	0.146297	0.0270837	0.195716	0.104871	0	0.0979535	0.243747	0.0689794	0.0552424	0.382073
D_0__Bacteria;D_1__Dadabacteria;D_2__Dadabacteriia;D_3__Dadabacteriales;D_4__uncultured marine bacterium;D_5__uncultured marine bacterium	0	0.0104119	0	0	0	0.0159824	0	0	0.0190698	0	0	0	0	0	0	0	0	0	0	0	0	0	0	0	0	0	0	0	0	0	0	0	0	0	0	0	0	0	0	0	0	0	0	0	0	0	0	0
D_0__Bacteria;D_1__Deinococcus-Thermus;D_2__Deinococci;D_3__Deinococcales;D_4__Deinococcaceae;D_5__Deinococcus	0	0	0	0	0	0	0	0	0	0	0	0	0	0	0	0	0	0	0	0	0	0	0	0.0138274	0	0	0	0	0	0	0	0	0	0	0	0	0	0	0	0	0	0.0367049	0	0	0	0	0	0
D_0__Bacteria;D_1__Deinococcus-Thermus;D_2__Deinococci;D_3__Deinococcales;D_4__Deinococcaceae;D_5__uncultured	0	0	0.0443206	0	0	0	0	0	0	0	0	0	0	0	0	0	0	0	0.0200389	0	0	0	0	0	0	0	0.00162189	0	0	0	0	0	0	0	0	0	0	0	0	0	0	0	0	0	0	0	0	0
D_0__Bacteria;D_1__Deinococcus-Thermus;D_2__Deinococci;D_3__Thermales;D_4__Thermaceae;D_5__Meiothermus	0	0	0	0	0.0255243	0.0213098	0	0	0.0266977	0.0251941	0.0380131	0	0	0	0	0	0	0	0	0	0	0	0.0762725	0.0152102	0	0.128296	0	0	0	0	0.101864	0.0802745	0	0	0	0	0	0	0	0	0.0151611	0.00524356	0	0	0	0	0	0
D_0__Bacteria;D_1__Deinococcus-Thermus;D_2__Deinococci;D_3__Thermales;D_4__Thermaceae;D_5__Thermus	0	0	0	0	0	0	0	0	0	0	0	0	0	0.00523524	0	0	0	0.190929	0.00261376	0.00386971	0	0.0169997	0.0201898	0.0248894	0.0267439	0	0	0	0	0	0	0	0	0	0	0	0	0	0	0	0	0	0	0	0	0	0	0
D_0__Bacteria;D_1__Dependentiae;D_2__Babeliae;D_3__Babeliales;D_4__Babeliaceae;D_5__uncultured bacterium	0	0	0	0	0	0	0	0.0297011	0	0	0	0	0	0	0	0	0	0	0	0	0	0	0	0	0.00184441	0	0	0	0	0	0	0	0	0	0	0	0	0	0	0	0	0	0	0	0	0.0622497	0	0
D_0__Bacteria;D_1__Dependentiae;D_2__Babeliae;D_3__Babeliales;D_4__Vermiphilaceae;D_5__uncultured bacterium	0	0	0	0	0	0	0	0	0	0	0	0	0	0	0	0	0	0	0	0	0	0	0	0	0	0	0	0	0	0	0	0	0	0	0	0	0	0	0	0	0	0	0	0	0.0149998	0	0	0
D_0__Bacteria;D_1__Dependentiae;D_2__Babeliae;D_3__Babeliales;D_4__uncultured bacterium;D_5__uncultured bacterium	0	0	0	0	0	0	0.00261011	0	0	0	0	0.00600118	0	0.00872539	0	0	0	0.0133517	0	0	0	0	0	0	0	0	0	0	0	0.00562572	0	0	0	0	0	0	0	0	0	0.0020062	0	0	0	0	0	0	0	0
D_0__Bacteria;D_1__Dependentiae;D_2__Babeliae;D_3__Babeliales;__;__	0	0	0	0	0	0	0	0	0	0	0	0	0	0	0	0	0	0	0	0	0	0	0	0	0	0	0	0	0	0	0	0	0	0	0	0	0	0	0	0.0441364	0	0	0	0	0	0	0	0
D_0__Bacteria;D_1__Epsilonbacteraeota;D_2__Campylobacteria;D_3__Campylobacterales;D_4__Arcobacteraceae;D_5__Arcobacter	0.00798263	0	0.0545484	0	0.0255243	0.0213098	0.00652529	0.0297011	0	0.00719832	0	0.0372073	0	0	0.0523401	0.047168	0.0127392	0	0	0.0116091	0	0.0185451	0.0717859	0.10094	0	0.123659	0	0	0	0.0478186	0.0118447	0	0.0956096	0.0163682	0.0318969	0.0224394	0	0.0184539	0.0208995	0.0270837	0.0385919	0.0402007	0	0.122442	0	0.0286012	0.00716105	0.140917
D_0__Bacteria;D_1__Epsilonbacteraeota;D_2__Campylobacteria;D_3__Campylobacterales;D_4__Sulfurospirillaceae;D_5__Sulfurospirillum	0	0	0	0	0	0.00710328	0	0	0	0.00359916	0	0	0.0390286	0.0314114	0	0.00786133	0	0	0	0	0	0	0	0	0	0	0	0	0	0	0	0.0100343	0	0	0	0	0	0	0	0	0	0	0	0	0	0	0	0
D_0__Bacteria;D_1__Epsilonbacteraeota;D_2__Campylobacteria;D_3__Campylobacterales;D_4__Thiovulaceae;D_5__Sulfurimonas	0	0	0	0	0	0	0	0	0	0	0	0	0	0	0	0	0	0	0	0	0	0	0	0.00553097	0	0	0	0	0.0390778	0	0	0	0	0	0	0	0	0	0	0	0	0	0	0	0	0	0	0
D_0__Bacteria;D_1__Firmicutes;D_2__Bacilli;D_3__Bacillales;D_4__Alicyclobacillaceae;D_5__Tumebacillus	0.033527	0	0	0	0.0255243	0	0	0.107667	0	0.00719832	0	0	0	0	0	0	0	0	0	0	0	0	0	0	0	0	0	0	0	0	0	0	0	0	0	0	0	0	0	0	0	0	0	0	0	0	0	0
D_0__Bacteria;D_1__Firmicutes;D_2__Bacilli;D_3__Bacillales;D_4__Bacillaceae;D_5__Aeribacillus	0.00798263	0.0113585	0.0383543	0	0	0	0	0	0	0	0	0.0516101	0	0.0366467	0	0	0.0396331	0	0.0392065	0.00870684	0	0.05409	0.0807591	0.0456305	0.00645542	0.11593	0	0	0.0439625	0.15752	0.364817	0	0	0	0	0.0428388	0	0	0.0564287	0	0	0	0	0.0297359	0	0.0269188	0	0
D_0__Bacteria;D_1__Firmicutes;D_2__Bacilli;D_3__Bacillales;D_4__Bacillaceae;D_5__Amphibacillus	0	0	0	0	0	0	0	0	0	0	0	0	0	0	0	0.00786133	0	0	0	0	0	0	0	0	0	0	0	0	0	0	0	0	0	0	0	0	0	0	0	0	0	0	0	0	0	0	0	0
D_0__Bacteria;D_1__Firmicutes;D_2__Bacilli;D_3__Bacillales;D_4__Bacillaceae;D_5__Anoxybacillus	0	0	0	0	0	0.019534	0	0	0	0	0	0	0	0	0	0	0	0	0	0	0	0	0.0201898	0.0165929	0	0	0	0	0	0.180023	0	0	0	0.0111304	0.0223278	0.0183595	0	0	0.0271694	0.0040124	0.0441051	0	0	0	0	0	0	0.011622
D_0__Bacteria;D_1__Firmicutes;D_2__Bacilli;D_3__Bacillales;D_4__Bacillaceae;D_5__Bacillus	0.561977	1.06012	1.99443	0.781479	0.582805	1.20401	0.732137	0.475218	0.39093	0.400407	0.545405	1.0262	1.08846	0.488622	0.226401	0.245666	0.530801	1.71702	1.5517	1.26056	1.3418	5.9669	2.00328	2.35343	0.757129	2.36653	0.00486567	0.886248	2.31536	4.11803	4.36595	1.31851	1.09887	0.342423	2.37951	2.39081	0.658443	0.0788485	0.930028	0.785427	0.556827	1.26894	0.0561271	2.05702	1.34998	0.927016	0.276212	3.72485
D_0__Bacteria;D_1__Firmicutes;D_2__Bacilli;D_3__Bacillales;D_4__Bacillaceae;D_5__Caldibacillus	0.0143687	0	0	0	0.0255243	0.00710328	0.0182708	0	0.00572093	0	0.0305757	0	0	0.0139606	0	0	0	0	0	0.00580456	0	0	0	0	0.00461101	0.0200946	0	0	0	0	0	0	0	0	0	0	0	0	0	0	0	0	0	0	0	0	0	0
D_0__Bacteria;D_1__Firmicutes;D_2__Bacilli;D_3__Bacillales;D_4__Bacillaceae;D_5__Calditerricola	0.0159653	0.0113585	0	0	0	0.00532746	0.0482871	0.00742528	0	0	0.0123956	0	0	0	0	0.00982666	0.00566187	0.0534067	0.0174251	0.0154788	0	0.0401811	0.0246764	0.0152102	0.0184441	0	0	0	0	0	0	0	0	0	0	0	0	0	0	0.0080248	0.00551314	0	0	0	0	0.0218715	0	0
D_0__Bacteria;D_1__Firmicutes;D_2__Bacilli;D_3__Bacillales;D_4__Bacillaceae;D_5__Cerasibacillus	0.0111757	0	0.00426159	0	0	0	0	0.0241322	0.0171628	0.00719832	0.00743734	0	0	0	0.00730327	0	0	0	0	0.0251531	0	0.0123634	0.0134599	0.0110619	0	0.0278233	0	0	0.146542	0.01969	0.037903	0	0.0752129	0.0301175	0	0	0.0333389	0	0.112857	0.0341054	0.0151611	0.0157307	0	0.0577226	0.00749991	0.0168243	0.00920707	0.11622
D_0__Bacteria;D_1__Firmicutes;D_2__Bacilli;D_3__Bacillales;D_4__Bacillaceae;D_5__Geobacillus	0.150073	0.141981	0.342632	0.154095	0.19994	0.312544	0.223165	0.471505	0.141116	0.17006	0.288404	0.216042	0.639636	0.308879	0.169192	0.428442	0.454365	0.805106	0.434756	0.82715	0.416233	4.04593	1.02071	1.35232	0.395625	2.18413	0	0.596215	1.1821	1.82836	2.37841	1.06364	0.4653	0.169575	0.20414	0.585463	0.479247	0.058717	0.526668	0.3561	0.190203	0.328597	0.0221554	1.18769	0.292496	0.605673	0.114577	0.793201
D_0__Bacteria;D_1__Firmicutes;D_2__Bacilli;D_3__Bacillales;D_4__Bacillaceae;D_5__Hydrogenibacillus	0.0255444	0	0.080118	0	0	0	0.0104405	0	0	0	0	0	0	0.0139606	0	0	0	0.0200275	0	0	0	0.075726	0.0134599	0.00691372	0	0	0	0	0	0	0	0	0.0216715	0	0.0318969	0.0509986	0	0.00838814	0	0.0160496	0	0	0	0	0	0.011777	0	0
D_0__Bacteria;D_1__Firmicutes;D_2__Bacilli;D_3__Bacillales;D_4__Bacillaceae;D_5__Oceanobacillus	0	0	0	0	0	0.00355164	0.0274062	0	0.0247907	0	0.0190065	0.0168033	0.0325239	0	0.00730327	0	0.00849281	0.0213627	0.0357214	0.0116091	0	0.0618171	0	0.0470133	0	0.0185489	0	0.0232543	0	0.0731344	0.0426409	0	0	0	0	0.0122397	0	0	0	0.020062	0.00964799	0	0	0.0962043	0	0.0218715	0.00716105	0.0188857
D_0__Bacteria;D_1__Firmicutes;D_2__Bacilli;D_3__Bacillales;D_4__Bacillaceae;D_5__Pseudogracilibacillus	0	0	0	0	0	0	0.00522023	0	0	0	0.00826371	0	0	0	0	0	0	0.008011	0	0	0	0	0.0112165	0	0	0	0	0	0	0.0253157	0	0	0.0101984	0	0	0	0	0	0	0	0	0	0	0	0	0	0	0
D_0__Bacteria;D_1__Firmicutes;D_2__Bacilli;D_3__Bacillales;D_4__Bacillaceae;D_5__Sinibacillus	0	0	0	0	0	0	0	0	0	0	0	0.0180035	0	0	0	0	0	0	0	0.00773941	0	0	0	0.0608407	0	0.0463722	0	0	0	0	0	0	0	0.0137493	0	0.0326391	0	0	0.0585186	0	0	0	0	0.0227392	0	0	0	0
D_0__Bacteria;D_1__Firmicutes;D_2__Bacilli;D_3__Bacillales;D_4__Bacillaceae;D_5__Ureibacillus	2.18564	2.96456	5.8452	3.13692	4.39444	4.19271	1.94976	0.840913	1.13084	1.33799	0.74456	3.64992	2.36774	0.706757	0.43211	0.410754	0.870513	0.526056	1.10649	1.62721	1.05701	2.32896	2.52148	3.06001	0.497067	5.61258	0.0154079	0.2713	4.20574	1.50207	7.5735	1.75801	1.46091	0.595803	2.50391	5.73428	1.98783	0.511676	1.94574	0.817526	1.28043	2.50293	0.120378	6.13259	1.89748	1.33585	0.315086	9.9063
D_0__Bacteria;D_1__Firmicutes;D_2__Bacilli;D_3__Bacillales;D_4__Bacillaceae;D_5__Virgibacillus	0	0	0	0	0	0	0	0	0	0	0	0	0	0	0	0	0	0	0	0	0	0	0	0	0	0	0	0	0	0	0	0	0	0	0	0	0	0	0	0	0	0	0	0	0	0.00841213	0	0.087165
D_0__Bacteria;D_1__Firmicutes;D_2__Bacilli;D_3__Bacillales;D_4__Bacillaceae;D_5__uncultured	0	0	0	0.0146757	0	0.00532746	0	0	0	0.00989769	0.0421449	0	0	0	0	0	0	0.0494012	0.00697004	0.0251531	0	0.0602717	0	0.0235066	0	0	0.00162189	0.0322977	0	0.0253157	0	0	0.0229463	0	0	0	0	0	0.0459789	0.0070217	0	0	0	0.122442	0	0	0.00716105	0
D_0__Bacteria;D_1__Firmicutes;D_2__Bacilli;D_3__Bacillales;D_4__Bacillaceae;__	0.217128	0.164698	0.122734	0.106399	0.127622	0.186461	0.0143556	0.00742528	0.0572093	0.0629853	0.10247	0.133226	0.0693842	0.0314114	0.017041	0.0373413	0.00990828	0	0.0121976	0.0106417	0	0.0989074	0.0515961	0.0815819	0.0341215	0.0510094	0	0.106582	0.0439625	0.109702	0.125554	0	0.0484422	0.0445216	0.20733	0.159115	0.133356	0	0.0501588	0.0210651	0.0441051	0	0.00738514	0.0524751	0	0.0773916	0.0153451	0.149633
D_0__Bacteria;D_1__Firmicutes;D_2__Bacilli;D_3__Bacillales;D_4__Family X;D_5__Thermicanus	0	0	0	0	0	0	0	0	0	0	0	0	0	0	0	0	0	0	0	0	0	0	0	0	0	0	0	0	0	0	0	0	0	0	0	0	0	0	0	0	0	0	0	0	0	0	0	0
D_0__Bacteria;D_1__Firmicutes;D_2__Bacilli;D_3__Bacillales;D_4__Family XII;D_5__Exiguobacterium	0	0	0	0	0	0	0	0	0	0	0	0.0168033	0	0.0314114	0	0	0	0	0	0	0	0	0	0	0	0	0	0	0	0	0	0	0	0	0	0	0	0	0	0	0	0	0	0	0	0	0	0
D_0__Bacteria;D_1__Firmicutes;D_2__Bacilli;D_3__Bacillales;D_4__Listeriaceae;D_5__Brochothrix	0	0	0	0	0	0	0	0	0	0	0	0	0	0	0	0	0	0	0	0	0	0	0	0.00553097	0	0.0247318	0	0	0	0	0	0	0	0	0	0	0	0	0	0	0	0.0262178	0	0	0	0	0	0.017433
D_0__Bacteria;D_1__Firmicutes;D_2__Bacilli;D_3__Bacillales;D_4__Listeriaceae;D_5__Listeria	0	0	0.15086	0	0	0	0.0574225	0	0	0	0	0	0	0	0	0	0	0	0.0113263	0	0.0328605	0	0	0	0	0.0370977	0.00243283	0	0	0	0	0.0280961	0	0.00589256	0	0	0	0	0	0.0541674	0	0.0192264	0	0	0	0	0.00613804	0.0392242
D_0__Bacteria;D_1__Firmicutes;D_2__Bacilli;D_3__Bacillales;D_4__Paenibacillaceae;D_5__Aneurinibacillus	0.0415097	0.0160912	0.0954597	0	0	0.049723	0.0247961	0.0315575	0	0.0179958	0.0561932	0	0	0.0279213	0.0328647	0.0452026	0.0254784	0.0547418	0.0932243	0.0290228	0	0.152997	0.0314063	0.053927	0.00645542	0.0695582	0	0.116272	0.170965	0.410678	0	0.0501716	0.0739381	0	0.488023	0.0999572	0.116686	0	0.0668784	0.0230713	0.0482399	0.0227221	0	0.0804618	0.0299996	0	0	0.193216
D_0__Bacteria;D_1__Firmicutes;D_2__Bacilli;D_3__Bacillales;D_4__Paenibacillaceae;D_5__Brevibacillus	0.0447027	0.0265031	0.00852319	0	0.0467946	0.0550504	0	0.0334138	0.0209768	0.0224948	0	0.0228045	0.14961	0.0191959	0	0.0255493	0.100498	0.0307088	0	0.00870684	0.043814	0.043272	0	0.0940265	0	0.125205	0	0.144693	0	0.0703215	0.0592235	0.0341167	0.0675641	0.0484499	0	0.0652781	0.0375063	0	0	0	0	0	0	0.0192409	0.0524993	0	0.00511504	0
D_0__Bacteria;D_1__Firmicutes;D_2__Bacilli;D_3__Bacillales;D_4__Paenibacillaceae;D_5__Paenibacillus	0.0207548	0.0302893	0.0460252	0.044027	0	0	0	0	0	0	0.0206593	0.0192038	0	0	0	0.0609253	0.021232	0	1.31559	0.0338599	0	0.186997	0.0740292	0.118916	0.0331993	0.064921	0	0.270008	0.0390778	0.241906	0.153981	0.014048	0	0	0	0	0.0375063	0	0	0.0280868	0	0	0	0.0857093	0	0.0100946	0	0
D_0__Bacteria;D_1__Firmicutes;D_2__Bacilli;D_3__Bacillales;D_4__Paenibacillaceae;D_5__Saccharibacillus	0	0	0	0	0	0	0	0	0	0	0	0	0	0	0	0	0	0	0	0	0	0	0	0	0	0	0	0	0	0	0	0	0	0	0	0	0	0	0	0	0	0	0	0	0	0	0	0
D_0__Bacteria;D_1__Firmicutes;D_2__Bacilli;D_3__Bacillales;D_4__Paenibacillaceae;D_5__Thermobacillus	0	0	0	0	0	0	0	0	0	0	0	0	0	0	0	0	0.00849281	0	0	0	0	0	0	0.0608407	0	0	0	0	0.0928097	0	0.104233	0	0	0.0615445	0	0	0	0	0	0	0	0	0	0.0122442	0	0	0	0
D_0__Bacteria;D_1__Firmicutes;D_2__Bacilli;D_3__Bacillales;D_4__Paenibacillaceae;__	0	0	0	0	0	0	0	0	0.0400465	0	0	0	0	0	0.023127	0.0137573	0	0	0	0	0	0.0834531	0	0	0	0	0	0	0	0	0	0	0	0	0	0	0	0	0	0	0	0	0	0	0	0	0.00613804	0
D_0__Bacteria;D_1__Firmicutes;D_2__Bacilli;D_3__Bacillales;D_4__Planococcaceae;D_5__Bhargavaea	0	0	0	0	0	0	0	0	0	0	0	0	0	0	0	0	0	0	0	0	0	0	0	0	0	0	0	0	0	0	0	0	0	0	0	0	0	0	0	0	0	0	0	0	0	0	0	0
D_0__Bacteria;D_1__Firmicutes;D_2__Bacilli;D_3__Bacillales;D_4__Planococcaceae;D_5__Kurthia	0.202759	0.0331289	0.0340927	0.0183446	0.0467946	0.0586021	0	0.0909597	0	0.0233945	0.022312	0.0228045	0	0.0104705	0.0182582	0.02948	0.0509569	0	0.00697004	0.0570782	0.043814	0.353903	0.219844	0.181139	0	0.100473	0.00243283	0	0	0.717279	0.298486	0.132453	0.0344195	0.00785675	0.191381	0.0917974	0.0125021	0.0184539	0.0564287	0.0451395	0.0248091	0	0.0125547	0.092706	0.0599993	0.05552	0.0163681	0.0552045
D_0__Bacteria;D_1__Firmicutes;D_2__Bacilli;D_3__Bacillales;D_4__Planococcaceae;D_5__Lysinibacillus	0	0.0170377	0.115915	0.0256824	0	0	0.0195759	0	0	0.00719832	0.0190065	0	0.0151778	0.0209409	0.00730327	0	0.0636961	0.0654232	0.0688291	0.124798	0.0164303	0.114362	0.0493528	0.0705199	0.0175219	0.117476	0	0	0	0.140643	0.158719	0.014048	0	0.0373195	0	0	0.0166694	0	0.0459789	0	0.103371	0	0	0	0.0224997	0.0134594	0.0480813	0.0276022
D_0__Bacteria;D_1__Firmicutes;D_2__Bacilli;D_3__Bacillales;D_4__Planococcaceae;D_5__Rummeliibacillus	0	0	0	0	0	0	0	0	0	0	0	0	0	0	0	0	0	0	0	0	0	0	0	0	0	0	0	0	0	0	0	0.00802745	0	0	0	0.0999572	0	0	0	0	0	0	0	0	0	0	0	0
D_0__Bacteria;D_1__Firmicutes;D_2__Bacilli;D_3__Bacillales;D_4__Planococcaceae;D_5__Savagea	0.00957916	0.02461	0.0272742	0.0587027	0	0.0816877	0.0339315	0.109523	0.0533954	0.0710834	0.0380131	0.0288056	0	0.0349016	0.023127	0.0510986	0.182595	0.0988024	0.162053	0.0948078	0	0.132907	0.100949	0.103706	0.0645542	0.217949	0	0	0.170965	0.109702	0	0.030103	0	0	0.0637938	0.0469187	0	0	0.0731483	0	0.0137828	0	0.00443109	0.0699668	0	0.0319661	0.0143221	0.135106
D_0__Bacteria;D_1__Firmicutes;D_2__Bacilli;D_3__Bacillales;D_4__Planococcaceae;D_5__Sporosarcina	0.0287375	0	0	0.0403581	0	0	0	0.0185632	0	0.0440897	0	0.0144028	0	0	0.063295	0.0137573	0	0	0.0801554	0	0.043814	0.143725	0.0246764	0.0566925	0.0175219	0.0448264	0	0	0	0	0	0.152522	0	0.0229155	0.0223278	0.108117	0.0375063	0.00503288	0.0229895	0	0.0261874	0	0.00590811	0.0874585	0.0637492	0.05552	0	0.0305077
D_0__Bacteria;D_1__Firmicutes;D_2__Bacilli;D_3__Bacillales;D_4__Planococcaceae;__	0	0	0.0255696	0	0	0.0088791	0	0	0	0.0476889	0	0.0132026	0	0	0	0	0	0	0.0801554	0	0	0	0	0	0	0	0	0.0878496	0	0.0140643	0	0	0	0	0	0	0	0	0	0	0	0	0	0.0384817	0	0	0	0
D_0__Bacteria;D_1__Firmicutes;D_2__Bacilli;D_3__Bacillales;D_4__Staphylococcaceae;D_5__Aliicoccus	0	0	0	0	0	0	0	0	0	0	0	0	0	0	0	0	0	0	0	0	0	0	0	0	0	0	0	0	0	0	0	0	0	0	0	0	0	0	0	0	0	0	0	0	0	0	0	0
D_0__Bacteria;D_1__Firmicutes;D_2__Bacilli;D_3__Bacillales;D_4__Staphylococcaceae;D_5__Jeotgalicoccus	0	0	0	0	0	0.00532746	0	0	0	0	0.0107428	0	0	0	0	0	0	0	0	0.0309577	0.0328605	0.021636	0	0	0	0	0	0	0	0	0.0521166	0.0260892	0	0	0	0	0	0	0	0	0	0	0	0	0	0	0	0
D_0__Bacteria;D_1__Firmicutes;D_2__Bacilli;D_3__Bacillales;D_4__Staphylococcaceae;D_5__Macrococcus	0.00957916	0	0.00852319	0	0	0	0.0169657	0.0129942	0.0190698	0.00359916	0.0347076	0	0	0.0139606	0.0255614	0	0.0155702	0.00534067	0.00609878	0	0	0.0401811	0	0.0165929	0.0193663	0	0	0	0	0.0787601	0.0331651	0.0220755	0	0.0196419	0	0.0224394	0	0	0	0	0.00964799	0	0	0	0	0.0286012	0	0.0450352
D_0__Bacteria;D_1__Firmicutes;D_2__Bacilli;D_3__Bacillales;D_4__Staphylococcaceae;D_5__Nosocomiicoccus	0	0	0	0	0	0	0.0247961	0	0.00953489	0	0.035534	0	0	0	0	0.00589599	0	0	0	0	0	0	0	0.00691372	0.00829983	0.0463722	0	0.041987	0	0	0	0	0	0	0	0	0	0	0	0	0	0.0104871	0	0.0489767	0	0	0	0
D_0__Bacteria;D_1__Firmicutes;D_2__Bacilli;D_3__Bacillales;D_4__Staphylococcaceae;D_5__Staphylococcus	0.0973881	0.047327	0.286379	0.0366892	0.0638108	0	0.067863	0.135511	0	0.0296931	0.178496	0.061212	0.158283	0.0174508	0.046254	0.115955	0.145793	0.393874	0.22217	0.0909381	0.0383373	0.32454	0.168248	0.224004	0.110664	0.421987	0.0235174	0.324268	0.34193	0.320666	0.578021	0.0802745	0.0879608	0.158444	0.0701732	0.136676	0.283381	0.0117434	0.0982277	0.225697	0.028944	0.0367049	0.0206784	0.111947	0.258747	0.0689794	0.0306902	0.0595627
D_0__Bacteria;D_1__Firmicutes;D_2__Bacilli;D_3__Bacillales;D_4__Thermoactinomycetaceae;D_5__Kroppenstedtia	0	0	0	0	0	0	0	0	0	0	0	0	0	0.00872539	0	0	0	0	0	0	0	0.032454	0	0	0	0	0	0	0	0.0168772	0	0	0	0	0	0	0	0	0	0	0	0	0	0	0	0	0	0
D_0__Bacteria;D_1__Firmicutes;D_2__Bacilli;D_3__Bacillales;D_4__Thermoactinomycetaceae;D_5__Thermoactinomyces	0	0	0	0	0	0	0	0	0	0	0	0	0	0	0	0	0	0	0.0252664	0	0	0	0	0	0	0	0	0	0	0	0	0	0	0.0261892	0.0765526	0	0	0	0	0	0	0	0.0051696	0.0454784	0	0.0773916	0	0
D_0__Bacteria;D_1__Firmicutes;D_2__Bacilli;D_3__Bacillales;__;__	0.0973881	0.0851886	0.0860842	0.0697094	0.0680648	0.0213098	0.0561175	0	0.0286047	0.0134969	0.0520614	0.157231	0	0.0104705	0.00486885	0	0.0184011	0.109484	0.040949	0.0396645	0.169779	0.0834531	0	0.0746681	0.00553322	0.216403	0	0.0310057	0.190504	0.202526	0.075806	0	0	0.0340459	0.0287072	0	0.0208368	0	0.0459789	0.0621922	0	0	0	0.0279867	0.0299996	0.0269188	0	0.124936
D_0__Bacteria;D_1__Firmicutes;D_2__Bacilli;D_3__Lactobacillales;D_4__Aerococcaceae;D_5__Aerococcus	0	0	0	0	0	0	0	0.0167069	0	0	0	0	0	0.0261762	0	0.00786133	0	0	0	0	0	0	0.0807591	0	0	0	0	0	0.0244236	0	0	0	0.0267707	0	0	0	0	0	0	0	0	0	0.00369257	0	0	0.0151418	0	0
D_0__Bacteria;D_1__Firmicutes;D_2__Bacilli;D_3__Lactobacillales;D_4__Aerococcaceae;D_5__Facklamia	0	0	0	0	0	0	0	0	0	0	0	0	0	0	0	0	0	0	0	0	0	0	0	0	0	0	0	0	0	0	0	0	0.00509918	0	0	0	0	0	0	0	0	0	0	0	0	0	0	0
D_0__Bacteria;D_1__Firmicutes;D_2__Bacilli;D_3__Lactobacillales;D_4__Aerococcaceae;D_5__Globicatella	0.0143687	0.00851886	0	0.0220135	0	0	0	0	0	0	0	0	0	0	0	0	0.0679425	0	0.0331077	0.0599805	0.043814	0.100453	0.094219	0.0677544	0.0285883	0.0571923	0	0	0	0.523192	0.0355341	0	0	0	0	0	0.0208368	0.00671051	0	0.0361116	0	0	0	0	0	0	0	0.034866
D_0__Bacteria;D_1__Firmicutes;D_2__Bacilli;D_3__Lactobacillales;D_4__Aerococcaceae;D_5__uncultured	0	0	0	0	0	0	0	0	0	0	0	0	0	0	0	0	0	0	0	0	0	0	0	0	0	0	0	0	0	0	0	0	0	0	0	0	0	0	0.0397091	0	0	0.0157307	0	0	0	0	0	0
D_0__Bacteria;D_1__Firmicutes;D_2__Bacilli;D_3__Lactobacillales;D_4__Carnobacteriaceae;D_5__Allofustis	0	0	0	0	0	0.0088791	0	0	0	0	0	0	0	0	0	0	0	0	0	0	0	0.021636	0	0	0	0	0	0.0206705	0	0.0112514	0	0	0	0	0	0	0	0	0	0	0	0	0	0	0	0	0	0
D_0__Bacteria;D_1__Firmicutes;D_2__Bacilli;D_3__Lactobacillales;D_4__Carnobacteriaceae;D_5__Atopococcus	0	0	0	0	0	0	0.0091354	0	0	0	0	0	0.0151778	0	0.0109549	0.00982666	0	0	0	0	0	0.0139089	0.0538394	0	0	0	0	0	0.0830403	0	0	0	0	0	0	0	0	0.0150986	0	0	0	0	0	0	0	0	0	0
D_0__Bacteria;D_1__Firmicutes;D_2__Bacilli;D_3__Lactobacillales;D_4__Carnobacteriaceae;D_5__Atopostipes	0	0	0	0	0	0	0	0	0	0	0.00247911	0	0	0	0.00365163	0	0	0	0	0	0	0.0479083	0	0.0138274	0	0.00463722	0	0.00322977	0	0.01969	0	0	0	0	0	0.0265192	0	0	0	0.0040124	0	0	0	0	0	0	0	0.0145275
D_0__Bacteria;D_1__Firmicutes;D_2__Bacilli;D_3__Lactobacillales;D_4__Carnobacteriaceae;D_5__Carnobacterium	0	0	0.0417636	0	0	0	0	0.0129942	0.00762791	0.0161962	0	0	0	0.0157057	0.00608606	0.00982666	0.0382176	0.00934617	0.0104551	0.0125765	0	0.0293631	0.094219	0.0663717	0	0.0850156	0	0	0.0390778	0.272847	0.123185	0.0100343	0.108358	0.00261892	0.108449	0.0448787	0.0250042	0	0.100318	0.0742294	0.0385919	0.0314614	0	0.136435	0.0599993	0.0504728	0.00306902	0.0668265
D_0__Bacteria;D_1__Firmicutes;D_2__Bacilli;D_3__Lactobacillales;D_4__Carnobacteriaceae;D_5__Granulicatella	0.0063861	0	0.00852319	0	0.0978432	0.0319648	0.00652529	0.0222758	0.0133488	0.0287933	0	0	0.0477016	0	0.0146065	0	0.0113237	0	0.0339789	0.0357948	0.0328605	0.043272	0.112165	0.105088	0.0553322	0.00927443	0	0	0.0976944	0	0.0165826	0.0481647	0	0	0	0	0	0	0	0	0	0	0	0	0	0	0	0
D_0__Bacteria;D_1__Firmicutes;D_2__Bacilli;D_3__Lactobacillales;D_4__Carnobacteriaceae;D_5__Jeotgalibaca	0	0	0	0	0	0	0	0	0	0	0	0	0	0	0	0	0	0	0	0	0	0	0	0	0	0	0	0	0	0	0	0	0	0	0	0.0489586	0	0	0	0	0	0	0	0	0	0.0269188	0	0
D_0__Bacteria;D_1__Firmicutes;D_2__Bacilli;D_3__Lactobacillales;D_4__Carnobacteriaceae;D_5__Pisciglobus	0	0	0	0	0	0	0	0	0	0	0	0	0	0	0	0	0	0	0	0	0	0	0	0	0.0147552	0	0	0	0	0	0	0	0	0	0	0	0	0	0	0	0	0	0	0	0	0	0	0
D_0__Bacteria;D_1__Firmicutes;D_2__Bacilli;D_3__Lactobacillales;D_4__Carnobacteriaceae;D_5__Trichococcus	0	0	0	0	0	0	0	0	0	0	0	0	0	0	0	0	0	0	0	0	0	0.0386357	0	0	0	0	0	0	0	0	0	0	0	0	0	0	0	0	0	0.0120372	0	0	0	0	0	0	0	0
D_0__Bacteria;D_1__Firmicutes;D_2__Bacilli;D_3__Lactobacillales;D_4__Enterococcaceae;Ambiguous_taxa	0	0	0	0	0	0	0	0	0	0	0	0	0	0	0	0	0.0169856	0	0.0278802	0	0	0	0.0403796	0	0	0	0	0.0316517	0	0	0	0	0	0	0	0	0	0	0	0	0	0	0	0	0	0	0	0
D_0__Bacteria;D_1__Firmicutes;D_2__Bacilli;D_3__Lactobacillales;D_4__Enterococcaceae;D_5__Enterococcus	0.0239479	0.126836	0.0468775	0.132081	0.242481	0.0514988	0.0900489	0.148506	0.0324186	0.107975	0.0793316	0.0624122	0.0867303	0.0366467	0.0827704	0.0864746	0.0495414	0.0988024	0	0.0619153	0.164303	0.123634	0.145815	0.0636062	0.0433435	0.139116	0.0129751	0.0381112	0.0488472	0.267222	0.824391	0.0521785	0.300852	0.0890431	0.159485	0.930214	0.108351	0.0536841	0.307223	0.272843	0.132315	0.104871	0.0155088	0.785377	0.0524993	0.257411	0.0716105	0.194668
D_0__Bacteria;D_1__Firmicutes;D_2__Bacilli;D_3__Lactobacillales;D_4__Enterococcaceae;D_5__Tetragenococcus	0	0	0	0	0	0	0	0	0	0	0	0	0	0	0	0	0	0	0	0	0	0	0	0	0	0	0	0	0	0	0	0	0	0	0	0	0	0	0	0	0	0	0	0	0	0	0	0
D_0__Bacteria;D_1__Firmicutes;D_2__Bacilli;D_3__Lactobacillales;D_4__Enterococcaceae;D_5__Vagococcus	0	0.0151446	0.0477298	0	0	0.0230857	0.0104405	0.0204195	0.0495814	0.0242943	0.00826371	0	0	0.0139606	0.00486885	0.017688	0.167025	0.0614177	0.0879967	0.176072	0.0711978	0.279722	0.159275	0.161781	0.05441	0.132934	0	0.137588	0.122118	0.568198	0.258214	0.0642196	0.043343	0	0.0255175	0.0163195	0	0	0	0.0050155	0.0606445	0.0402007	0.00664663	0.16792	0.104999	0.0185067	0.0143221	0.0305077
D_0__Bacteria;D_1__Firmicutes;D_2__Bacilli;D_3__Lactobacillales;D_4__Enterococcaceae;__	0.0063861	0.00757232	0	0	0	0	0	0.00742528	0	0	0	0	0	0	0	0	0.021232	0	0.0182963	0.0474039	0	0	0.0224331	0	0	0.0154574	0	0.068471	0	0	0.0426409	0.0280961	0	0	0	0	0	0	0	0.0140434	0	0	0	0	0	0	0	0
D_0__Bacteria;D_1__Firmicutes;D_2__Bacilli;D_3__Lactobacillales;D_4__Lactobacillaceae;D_5__Lactobacillus	55.3356	52.3824	50.7454	57.613	55.6558	53.0775	56.2127	51.5129	59.3108	55.6232	57.513	59.5581	53.9788	59.2088	59.2173	58.5649	58.3923	51.5842	48.3015	54.4284	63.6727	17.7709	17.8523	17.352	2.47519	14.8468	0.0462238	2.35192	7.98163	22.8264	18.0229	47.8557	16.1746	7.6361	13.8815	23.9346	7.75963	3.85519	14.5502	8.55744	7.90032	6.1542	0.856677	33.4756	9.79863	14.945	3.09153	19.753
D_0__Bacteria;D_1__Firmicutes;D_2__Bacilli;D_3__Lactobacillales;D_4__Lactobacillaceae;D_5__Pediococcus	0.518871	0.49788	0.730437	0.40725	0.344578	0.527419	0.455465	0.367552	0.430977	0.883594	1.21063	0.848566	1.64137	1.21807	0.869089	0.585669	0.413317	0.72099	0.529723	0.488551	0.607919	0.0463628	0.0336496	0.0276549	0.0184441	0.0479179	0	0	0	0	0	0.513757	0.00509918	0	0	0.00611983	0	0	0	0	0	0	0	0	0	0	0.00613804	0
D_0__Bacteria;D_1__Firmicutes;D_2__Bacilli;D_3__Lactobacillales;D_4__Lactobacillaceae;__	0	0	0	0	0	0	0	0	0	0	0	0	0	0	0	0	0	0	0	0.00483713	0	0	0	0	0	0	0	0	0	0	0	0	0	0	0	0	0	0	0	0	0	0	0	0	0	0	0	0
D_0__Bacteria;D_1__Firmicutes;D_2__Bacilli;D_3__Lactobacillales;D_4__Leuconostocaceae;D_5__Leuconostoc	7.50527	9.35086	9.09509	9.69328	10.4309	7.81716	7.73116	11.0767	8.33921	6.71154	9.3099	7.6419	14.4297	8.78298	7.11095	6.93369	6.74188	5.16176	5.2798	5.51143	7.47029	1.10962	0.960136	0.808905	0.265594	1.22113	0.0162189	0.236419	1.03556	3.00132	1.26501	4.51143	0.0280455	0.0615445	0.114829	0	0.0166694	0	0	0.0120372	0	0	0	0.307854	0	0	0.0286442	0.063921
D_0__Bacteria;D_1__Firmicutes;D_2__Bacilli;D_3__Lactobacillales;D_4__Leuconostocaceae;D_5__Oenococcus	0	0	0	0	0	0	0	0	0	0	0	0	0	0	0	0	0	0	0	0	0	0	0	0	0	0	0	0	0	0	0	0	0	0	0	0	0	0	0	0	0	0	0	0	0	0	0	0
D_0__Bacteria;D_1__Firmicutes;D_2__Bacilli;D_3__Lactobacillales;D_4__Leuconostocaceae;D_5__Weissella	1.66358	1.55516	1.65435	1.82345	1.16986	1.42421	1.67439	2.01968	1.50842	1.51975	1.7767	1.57831	2.01648	1.72763	1.66636	1.52313	1.52163	1.69166	1.10649	1.61173	2.45906	4.15102	3.60051	2.89823	0.708252	3.01883	0.00973133	0.546476	1.9832	4.62434	4.84448	1.79815	0.0688389	0.13291	0.0701732	0.173395	0.0333389	0.0318749	0.148387	0.0922852	0.0840753	0.0559313	0.024371	0.281616	0	0.302837	0.0358053	0.20629
D_0__Bacteria;D_1__Firmicutes;D_2__Bacilli;D_3__Lactobacillales;D_4__Streptococcaceae;D_5__Lactococcus	6.86347	6.98546	6.64212	6.23716	6.55124	6.65577	6.35041	7.00575	6.52949	5.61289	6.91094	5.52708	5.91934	7.05361	5.62108	5.88027	5.07021	5.42478	3.722	4.50918	5.537	0.59499	0.361173	0.571073	0.0746984	0.485362	0	0.0439248	0.122118	0.959185	0.611186	4.08397	0.0101984	0	0.0701732	0	0	0	0.106588	0	0.0330788	0	0.0051696	0.0962043	0.0187498	0	0.00511504	0
D_0__Bacteria;D_1__Firmicutes;D_2__Bacilli;D_3__Lactobacillales;D_4__Streptococcaceae;D_5__Lactovum	0	0	0	0	0	0	0	0.0129942	0.00572093	0	0	0.0144028	0	0	0	0	0.0849281	0	0	0	0	0	0	0	0	0	0	0	0	0	0	0	0	0	0	0	0	0	0	0	0	0	0	0	0	0	0	0
D_0__Bacteria;D_1__Firmicutes;D_2__Bacilli;D_3__Lactobacillales;D_4__Streptococcaceae;D_5__Streptococcus	1.15588	0.671096	0.536108	1.0383	0.914621	0.971374	1.17455	1.46278	1.02214	1.23721	1.19824	1.031	0.839115	1.15175	1.4144	1.36591	0.508153	0.667583	0.272703	0.473072	0.350512	1.06944	0.782915	0.651272	0.222251	0.997001	0.00892039	0.213165	0.327276	1.924	1.30529	0.375283	0.718984	0.610207	0.82294	1.04649	0.312552	0.236545	0.616536	0.586813	0.52237	0.207995	0.0302791	1.92234	0.348746	0.989266	0.248591	0.682792
D_0__Bacteria;D_1__Firmicutes;D_2__Bacilli;D_3__Lactobacillales;__;__	0.0319305	0.156179	0.037502	0.0623716	0.1574	0.0781361	0.0587276	0.137368	0.0514884	0.0971774	0.127261	0.133226	0.117086	0.0610778	0.109549	0.0609253	0.131639	0.130846	0.0383352	0.110287	0.0985815	0	0.0224331	0	0.0248995	0.102019	0	0.027776	0	0.0365672	0	0.0421441	0	0	0	0	0	0	0	0	0	0	0	0	0	0	0	0
D_0__Bacteria;D_1__Firmicutes;D_2__Clostridia;D_3__Clostridiales;D_4__Caldicoprobacteraceae;D_5__Caldicoprobacter	0.0175618	0	0	0	0	0.0248615	0	0.0092816	0.0114419	0	0	0	0	0	0.0109549	0.0687866	0.0750198	0.112154	0.0470478	0.0319251	0	0.0849985	0.0807591	0.0622235	0.0285883	0	0	0	0	0.104076	0.144505	0	0.0573658	0	0	0	0	0	0.0167196	0.0160496	0	0.00349571	0	0	0	0	0	0.0029055
D_0__Bacteria;D_1__Firmicutes;D_2__Clostridia;D_3__Clostridiales;D_4__Clostridiaceae 1;Ambiguous_taxa	0	0	0	0	0	0	0	0	0	0	0	0	0	0	0	0	0	0	0	0	0	0	0	0	0	0	0	0	0	0	0	0	0	0	0	0	0	0	0	0	0	0	0	0	0	0	0	0
D_0__Bacteria;D_1__Firmicutes;D_2__Clostridia;D_3__Clostridiales;D_4__Clostridiaceae 1;D_5__Caloramator	0.0127722	0	0	0	0.0425405	0	0.0130506	0	0.0247907	0	0.0404922	0.0240047	0	0	0	0	0	0	0	0	0	0	0	0	0	0.0386435	0	0	0	0	0	0	0	0	0	0	0	0	0	0	0	0	0	0	0	0	0	0
D_0__Bacteria;D_1__Firmicutes;D_2__Clostridia;D_3__Clostridiales;D_4__Clostridiaceae 1;D_5__Clostridium sensu stricto 1	3.13079	2.62191	2.56804	1.99589	2.79066	2.06705	2.48613	3.04251	2.214	2.67688	2.12543	2.32846	1.04076	2.12376	1.83069	2.03412	2.11754	1.58351	1.85054	2.09932	1.01868	4.984	3.01949	2.51659	0.549633	2.87198	0.00405472	0.354628	0.981829	6.10953	5.2164	4.24251	0.0739381	0.111959	0.114829	0.148916	0.0416736	0.026842	0.0773282	0.0461426	0	0.0419485	0.00221554	0.276369	0	0.121135	0.0143221	0.244062
D_0__Bacteria;D_1__Firmicutes;D_2__Clostridia;D_3__Clostridiales;D_4__Clostridiaceae 1;D_5__Clostridium sensu stricto 10	0	0	0	0	0	0	0	0	0	0	0	0	0	0	0	0	0	0	0	0	0	0	0	0.0138274	0	0	0	0	0	0	0	0	0	0	0	0	0	0	0	0	0	0	0	0	0	0	0	0
D_0__Bacteria;D_1__Firmicutes;D_2__Clostridia;D_3__Clostridiales;D_4__Clostridiaceae 1;D_5__Clostridium sensu stricto 11	0	0	0	0	0	0	0	0	0	0	0.0140483	0	0	0	0.00973769	0	0	0	0	0	0	0	0	0	0	0	0	0	0	0	0	0	0	0	0	0	0	0	0	0	0	0	0	0	0	0	0	0
D_0__Bacteria;D_1__Firmicutes;D_2__Clostridia;D_3__Clostridiales;D_4__Clostridiaceae 1;D_5__Clostridium sensu stricto 12	0	0.0104119	0	0.0366892	0.0255243	0.0284131	0	0.0148506	0	0.0350918	0.0462768	0.00720141	0	0.0244311	0.0158237	0	0.0155702	0	0	0	0	0.010818	0	0	0	0	0	0	0	0	0	0.0421441	0	0	0	0	0	0	0	0	0	0	0	0	0	0	0	0
D_0__Bacteria;D_1__Firmicutes;D_2__Clostridia;D_3__Clostridiales;D_4__Clostridiaceae 1;D_5__Clostridium sensu stricto 13	0	0	0	0	0	0	0	0	0	0	0.0173538	0.0336066	0	0	0	0	0	0	0	0.0290228	0.0273838	0	0.0381363	0	0	0	0	0	0.117233	0	0	0.0100343	0	0.0170229	0	0	0	0	0	0	0	0	0	0	0	0	0	0
D_0__Bacteria;D_1__Firmicutes;D_2__Clostridia;D_3__Clostridiales;D_4__Clostridiaceae 1;D_5__Clostridium sensu stricto 14	0	0.0217704	0	0	0	0.0550504	0.0091354	0	0.0133488	0.0197954	0	0.0480094	0	0.0104705	0.0206926	0.00786133	0.0481259	0	0	0	0.0109535	0	0	0	0	0.0154574	0	0	0	0	0	0	0	0	0	0	0	0	0	0	0	0	0	0	0	0	0	0
D_0__Bacteria;D_1__Firmicutes;D_2__Clostridia;D_3__Clostridiales;D_4__Clostridiaceae 1;D_5__Clostridium sensu stricto 15	0.0319305	0.178896	0.0238649	0.10273	0	0.0603779	0.0169657	0.0575459	0.0133488	0.0359916	0.0396658	0.0216042	0.0542064	0.022686	0.0121721	0.047168	0	0.122835	0.0261376	0.0280554	0	0.0139089	0.065056	0.0801991	0.0461101	0.035552	0	0.178929	0.112349	0.03938	0.3127	0.0481647	0.0458926	0.174158	0.0733629	0.169315	0.104184	0.00838814	0	0.0511581	0	0.0594271	0	0.0192409	0.0487494	0.0319661	0.0398973	0.1322
D_0__Bacteria;D_1__Firmicutes;D_2__Clostridia;D_3__Clostridiales;D_4__Clostridiaceae 1;D_5__Clostridium sensu stricto 16	0	0	0	0	0	0	0	0	0	0	0.0594987	0	0	0	0	0	0	0	0	0	0	0	0	0	0	0	0	0	0	0	0	0	0	0	0	0	0	0	0	0	0	0	0	0	0	0	0	0
D_0__Bacteria;D_1__Firmicutes;D_2__Clostridia;D_3__Clostridiales;D_4__Clostridiaceae 1;D_5__Clostridium sensu stricto 18	0.0590715	0.203506	0.0929027	0	0.0212703	0.0372922	0.0182708	0.0723965	0	0.0485887	0.136351	0.0120024	0.00867303	0.0279213	0.0511229	0.0255493	0.131639	0.0347143	0.0165538	0.0503062	0.0766745	0.202451	0.0201898	0.106471	0.0276661	0.0664668	0	0.0510303	0	0.0590701	0.0426409	0.044151	0.0650145	0	0.092501	0.0795577	0	0.00671051	0.0208995	0.0160496	0.0248091	0.0489399	0.0110777	0.0157425	0	0.114405	0	0.235345
D_0__Bacteria;D_1__Firmicutes;D_2__Clostridia;D_3__Clostridiales;D_4__Clostridiaceae 1;D_5__Clostridium sensu stricto 2	0	0	0	0	0	0	0	0	0	0	0	0	0	0	0	0	0	0	0	0	0	0	0	0.0138274	0	0	0	0	0	0	0	0	0	0	0	0	0	0	0	0	0	0	0	0	0	0	0	0
D_0__Bacteria;D_1__Firmicutes;D_2__Clostridia;D_3__Clostridiales;D_4__Clostridiaceae 1;D_5__Clostridium sensu stricto 5	0	0	0	0	0	0.019534	0.0130506	0	0	0	0.0305757	0	0	0	0	0	0.0184011	0	0.00435627	0	0	0.097362	0.0426229	0.0456305	0	0.0278233	0	0	0.0195389	0.368485	0.146874	0	0	0	0.0255175	0.0795577	0	0	0	0	0	0.0262178	0	0.0244884	0.0337496	0.0605673	0.0225062	0.0130747
D_0__Bacteria;D_1__Firmicutes;D_2__Clostridia;D_3__Clostridiales;D_4__Clostridiaceae 1;D_5__Clostridium sensu stricto 7	0.194776	0.361578	0.329847	0.172439	0.0297784	0	0.151387	0.204195	0.156372	0.293332	0.193371	0.0972191	0.266696	0.115175	0.208143	0.0943359	0.253369	0.523385	0.351987	0.525313	0.40528	0.698533	0.114409	0.182522	0.160463	0.343154	0	0.315225	0.415201	0.99294	0.556701	0.427462	0.133853	0.0517236	0.248796	0.226434	0.0958493	0.0385854	0.123307	0.0130403	0.0399702	0.16255	0.00590811	0.460031	0.176248	0.286012	0.0306902	0.219365
D_0__Bacteria;D_1__Firmicutes;D_2__Clostridia;D_3__Clostridiales;D_4__Clostridiaceae 1;D_5__Clostridium sensu stricto 8	0.571556	0.643647	1.32621	0.788817	0.731697	0.73519	0.281892	0.0891034	0.272698	0.246543	0.243779	0.656529	0.22333	0.143096	0.0925081	0.0569946	0.27177	0.385863	0.121104	0.274749	0.246454	0.295177	0.130112	0.452157	0.20104	1.72504	0	0.0381112	1.3433	1.57801	2.43527	0.602059	0.142777	0.127017	0.570955	1.08729	0.383397	0.0620722	0.482779	0.0752325	0.32114	0.353067	0.025848	0.591219	0.479994	0.0639322	0.0501274	1.58786
D_0__Bacteria;D_1__Firmicutes;D_2__Clostridia;D_3__Clostridiales;D_4__Clostridiaceae 1;D_5__Haloimpatiens	0	0	0	0	0	0	0	0	0	0	0	0	0	0	0	0	0	0	0	0	0	0	0	0	0	0	0	0	0	0	0	0	0	0	0	0	0	0	0	0	0	0	0	0	0	0	0	0
D_0__Bacteria;D_1__Firmicutes;D_2__Clostridia;D_3__Clostridiales;D_4__Clostridiaceae 1;D_5__Hathewaya	0	0.0141981	0	0	0	0	0	0.0259885	0	0	0.0487559	0	0	0	0.0182582	0	0.0608651	0.0547418	0	0.0599805	0.0931048	0.205542	0.0448662	0	0.0258217	0.0881071	0	0	0.034193	0.188462	0.348234	0.0461579	0.116006	0.0111304	0.0701732	0.0326391	0	0	0.106588	0	0.0179177	0.110115	0.00886217	0.173168	0.0262497	0.0841213	0.0419433	0.204838
D_0__Bacteria;D_1__Firmicutes;D_2__Clostridia;D_3__Clostridiales;D_4__Clostridiaceae 1;D_5__Proteiniclasticum	0	0.0160912	0	0	0	0	0	0	0	0	0	0	0	0	0	0	0	0	0	0	0	0	0	0	0	0	0	0	0	0	0	0	0	0	0	0	0	0	0	0	0	0	0	0	0	0	0	0
D_0__Bacteria;D_1__Firmicutes;D_2__Clostridia;D_3__Clostridiales;D_4__Clostridiaceae 1;D_5__Sarcina	0.100581	0.111692	0.0417636	0.124743	0.119113	0.0426197	0.0965742	0.0426954	0	0.0782818	0.0314021	0.0648127	0	0.0732933	0.109549	0.121851	0.042464	0.0787749	0.0165538	0	0	0.0370903	0.0740292	0.0276549	0	0.0309148	0	0	0	0.03938	0	0.0381304	0	0	0	0	0	0	0	0	0	0	0	0	0	0	0	0
D_0__Bacteria;D_1__Firmicutes;D_2__Clostridia;D_3__Clostridiales;D_4__Clostridiaceae 1;D_5__uncultured	0	0	0	0	0	0	0	0	0	0	0	0.00480094	0	0	0	0	0	0	0	0	0	0	0	0	0	0.0370977	0	0	0	0	0	0	0	0	0	0	0	0	0	0	0	0	0	0	0	0	0	0
D_0__Bacteria;D_1__Firmicutes;D_2__Clostridia;D_3__Clostridiales;D_4__Clostridiaceae 1;D_5__uncultured bacterium	0	0	0	0	0	0	0	0	0	0	0	0	0	0	0	0	0	0	0.00435627	0	0	0	0.00672993	0	0	0	0	0	0	0	0	0	0.00637397	0	0.0191381	0	0	0	0	0	0	0	0	0	0	0.00841213	0	0
D_0__Bacteria;D_1__Firmicutes;D_2__Clostridia;D_3__Clostridiales;D_4__Clostridiaceae 1;__	0.094195	0.0747766	0.0767087	0	0	0.0799119	0.069168	0.0408391	0	0.0179958	0.022312	0.0396078	0.0737207	0	0.00608606	0	0	0.0534067	0.0200389	0	0	0.152997	0.166005	0.127212	0.0331993	0.143754	0	0.0245462	0.307737	0.455683	0.298486	0	0.0573658	0.0202966	0.137157	0.0285592	0.0875146	0	0.131667	0	0.0220525	0.0576792	0.0110777	0.199405	0.0299996	0.0487903	0	0.213554
D_0__Bacteria;D_1__Firmicutes;D_2__Clostridia;D_3__Clostridiales;D_4__Clostridiaceae 2;D_5__Alkaliphilus	0	0	0	0	0	0	0	0	0	0	0	0	0	0	0.00486885	0	0	0	0	0	0	0	0	0	0	0.0185489	0	0	0	0	0	0	0	0	0	0	0	0	0	0	0	0	0	0	0	0	0	0
D_0__Bacteria;D_1__Firmicutes;D_2__Clostridia;D_3__Clostridiales;D_4__Clostridiaceae 2;__	0	0	0	0	0	0	0	0	0	0	0	0	0	0	0	0	0	0	0	0	0	0	0	0	0	0	0	0	0	0	0.0686992	0	0	0	0	0	0	0	0	0	0	0	0	0.0174917	0	0	0	0
D_0__Bacteria;D_1__Firmicutes;D_2__Clostridia;D_3__Clostridiales;D_4__Defluviitaleaceae;D_5__Defluviitalea	0.15646	0.210132	0.477298	0.209128	0.153146	0.106549	0.0326264	0.0204195	0.0724651	0.0953778	0.0785053	0.220843	0.143105	0.022686	0.0255614	0.00393066	0	0	0.0217814	0	0	0.0710897	0.0493528	0.0719027	0.0110664	0.160757	0	0	0.117233	0	0.24637	0.030103	0.119831	0.0045831	0.31259	0.36719	0.0791799	0.013421	0.135847	0.0180558	0	0.0751577	0.00664663	0.124191	0.217497	0.0471079	0.00409203	0.748166
D_0__Bacteria;D_1__Firmicutes;D_2__Clostridia;D_3__Clostridiales;D_4__Defluviitaleaceae;D_5__Defluviitaleaceae UCG-011	0	0	0	0	0	0	0	0	0	0	0	0	0	0	0	0	0.00566187	0.0280385	0	0	0	0.0154543	0	0.0152102	0	0.0556466	0	0	0	0	0	0	0	0	0	0	0	0	0	0	0	0	0	0	0	0	0	0
D_0__Bacteria;D_1__Firmicutes;D_2__Clostridia;D_3__Clostridiales;D_4__Eubacteriaceae;D_5__Garciella	0.0207548	0.0331289	0	0	0	0.0248615	0	0	0	0	0.00826371	0	0	0	0	0	0	0	0	0	0	0	0	0.00691372	0	0	0	0	0	0	0	0	0.0344195	0	0	0	0	0	0	0	0	0	0	0.0262375	0.0299996	0	0	0
D_0__Bacteria;D_1__Firmicutes;D_2__Clostridia;D_3__Clostridiales;D_4__Family XI;D_5__Anaerococcus	0	0	0	0	0	0	0	0	0	0	0	0.00840165	0	0	0	0.0196533	0.0127392	0.0186923	0	0	0	0	0.0134599	0	0.0101442	0.0386435	0	0	0	0.0112514	0	0	0	0	0	0	0	0	0.0188096	0	0	0	0	0	0	0	0	0
D_0__Bacteria;D_1__Firmicutes;D_2__Clostridia;D_3__Clostridiales;D_4__Family XI;D_5__Anaerosalibacter	0.0175618	0.036915	0.0383543	0	0.0170162	0.0230857	0.0495922	0.0371264	0.00953489	0.0503883	0.0396658	0.0132026	0	0.0715482	0.0486885	0.02948	0.0622806	0.0734342	0	0.0299902	0.0602443	0.0386357	0.0874891	0.0912611	0	0.0772869	0	0	0	0.0450058	0	0.0802745	0.0242211	0.0150588	0.124398	0.0734379	0.0625104	0	0.0188096	0.0692139	0.00413485	0	0	0.265874	0	0	0.0173911	0.092976
D_0__Bacteria;D_1__Firmicutes;D_2__Clostridia;D_3__Clostridiales;D_4__Family XI;D_5__Finegoldia	0	0	0	0	0	0	0	0	0	0	0	0	0	0	0	0	0	0	0	0	0	0	0	0	0	0.0602838	0	0	0	0	0	0	0	0	0	0	0.0125021	0	0	0.0170527	0	0	0	0	0	0.011777	0	0
D_0__Bacteria;D_1__Firmicutes;D_2__Clostridia;D_3__Clostridiales;D_4__Family XI;D_5__Gallicola	0.0255444	0.0331289	0.0349451	0	0.0255243	0.0514988	0.0326264	0.0297011	0	0.017096	0.0528878	0.0396078	0.0390286	0.0191959	0.0267787	0.0275146	0.0608651	0.0574122	0.203874	0.100612	0.0931048	0.131361	0.0493528	0.0096792	0.0949869	0.0556466	0	0.0755765	0.0195389	0.258783	0.258214	0.136467	0.056091	0	0.0669835	0.175435	0	0	0	0.020062	0.0151611	0.0104871	0.00369257	0.0349834	0	0.100946	0.00716105	0
D_0__Bacteria;D_1__Firmicutes;D_2__Clostridia;D_3__Clostridiales;D_4__Family XI;D_5__Gottschalkia	0	0	0	0	0	0	0	0	0	0	0	0	0	0.0104705	0	0	0	0	0	0	0	0	0	0	0	0	0	0	0	0	0	0	0	0	0	0	0	0	0	0	0	0	0	0	0	0	0	0
D_0__Bacteria;D_1__Firmicutes;D_2__Clostridia;D_3__Clostridiales;D_4__Family XI;D_5__Keratinibaculum	0	0	0	0	0	0	0	0	0	0	0	0	0	0	0	0	0	0	0	0	0	0	0	0	0	0	0	0	0	0	0	0	0	0	0	0	0	0	0	0	0	0	0	0	0	0	0	0
D_0__Bacteria;D_1__Firmicutes;D_2__Clostridia;D_3__Clostridiales;D_4__Family XI;D_5__Peptoniphilus	0.033527	0.0672043	0.0460252	0.0366892	0.0425405	0.049723	0.0117455	0.0222758	0.0343256	0.0161962	0.0669361	0.0156031	0.19948	0	0.0292131	0.0196533	0.205243	0.0120165	0.095838	0.158658	0.153349	0.503809	0.0381363	0.102323	0.0516434	0.170031	0	0	0.0732708	0.360046	0.461943	0.122419	0.0305951	0	0	0.036719	0	0	0.0229895	0	0.0151611	0.012235	0	0.0139934	0	0.0100946	0.00306902	0.0552045
D_0__Bacteria;D_1__Firmicutes;D_2__Clostridia;D_3__Clostridiales;D_4__Family XI;D_5__Sedimentibacter	0	0	0	0	0	0	0	0	0	0	0	0	0	0	0	0	0	0	0	0	0	0	0	0	0	0	0	0	0	0	0	0	0	0	0	0	0	0	0	0	0	0.00524356	0	0	0	0	0	0
D_0__Bacteria;D_1__Firmicutes;D_2__Clostridia;D_3__Clostridiales;D_4__Family XI;D_5__Sporanaerobacter	0	0.0141981	0	0	0.0212703	0.0550504	0	0	0.00762791	0	0	0	0	0.00698032	0.0194754	0	0	0.0333792	0	0.0222508	0	0	0.0224331	0.0981748	0	0.0170031	0	0	0	0	0.040272	0	0.00764877	0	0.0446557	0.0734379	0.0708451	0	0.0543387	0.020062	0	0.0367049	0	0.0489767	0	0.0201891	0	0.223723
D_0__Bacteria;D_1__Firmicutes;D_2__Clostridia;D_3__Clostridiales;D_4__Family XI;D_5__Tepidimicrobium	0.127722	0.139141	0.127848	0.13575	0.0680648	0.0816877	0.187928	0.0352701	0.0705582	0.112474	0.0743734	0.295258	0.156114	0.0785285	0.0681638	0.023584	0.0622806	0.0360495	0.0470478	0.0909381	0.065721	0.823713	0.262467	0.356748	0.0470324	0.610567	0.00324378	0.0303598	0.293083	0.149082	0.51406	0.0541853	0.182296	0.0549972	0.194571	0.567104	0.120853	0.0805261	0.246614	0.162502	0.267387	0.169542	0.0265865	0.682176	0.127498	0.27087	0.0869556	0.88763
D_0__Bacteria;D_1__Firmicutes;D_2__Clostridia;D_3__Clostridiales;D_4__Family XI;D_5__Tissierella	0	0	0.0315358	0	0	0	0	0	0	0	0	0	0	0	0.0219098	0	0	0	0	0	0.0273838	0.0463628	0.00672993	0.0124447	0	0	0	0.0213165	0	0	0	0.0280961	0.0790373	0.0419026	0.0127588	0.128516	0.0333389	0	0	0	0	0.0139828	0.00221554	0	0.0899989	0.0454255	0.00920707	0.092976
D_0__Bacteria;D_1__Firmicutes;D_2__Clostridia;D_3__Clostridiales;D_4__Family XI;D_5__W5053	0	0	0	0	0.0425405	0	0	0	0	0	0	0	0	0	0	0	0	0	0	0	0	0.0200906	0	0	0	0	0	0	0	0	0	0	0	0	0	0	0	0	0	0	0	0	0	0	0	0	0	0
D_0__Bacteria;D_1__Firmicutes;D_2__Clostridia;D_3__Clostridiales;D_4__Family XI;D_5__uncultured	0	0.00378616	0	0	0.0255243	0	0.00391517	0	0	0	0.0214857	0	0	0	0	0	0	0	0.0121976	0	0	0.0726351	0	0	0	0	0	0	0.0195389	0.0225029	0	0	0.0573658	0	0	0	0.0333389	0	0	0	0.0385919	0	0	0.0892076	0	0	0	0
D_0__Bacteria;D_1__Firmicutes;D_2__Clostridia;D_3__Clostridiales;D_4__Family XI;__	0	0	0.0357974	0	0	0	0	0	0	0.00539874	0	0	0	0	0	0.0196533	0	0	0	0	0	0.0185451	0.0201898	0	0.00645542	0	0	0	0	0.0168772	0.00947575	0.0160549	0	0	0.0669835	0.0183595	0	0	0	0	0	0.0139828	0	0	0	0	0.00818406	0
D_0__Bacteria;D_1__Firmicutes;D_2__Clostridia;D_3__Clostridiales;D_4__Family XIII;D_5__[Eubacterium] nodatum group	0.0063861	0.0738301	0.0144894	0.0146757	0.0255243	0	0	0.0556896	0	0.0305929	0	0.0168033	0	0.0383917	0.0158237	0.0668213	0.0467105	0.0120165	0.0531465	0.0493388	0	0.097362	0.029163	0.0801991	0	0	0	0.00775144	0	0.180023	0.281904	0.0160549	0	0	0	0	0.0166694	0	0	0	0	0	0	0	0	0	0	0
D_0__Bacteria;D_1__Firmicutes;D_2__Clostridia;D_3__Clostridiales;D_4__Family XIII;D_5__uncultured	0	0	0	0	0	0	0	0	0	0	0	0	0	0	0	0	0	0.0146868	0	0	0	0.0185451	0.065056	0.0276549	0	0.0278233	0	0	0	0	0	0.044151	0	0	0	0	0	0	0	0	0	0	0	0	0	0	0	0
D_0__Bacteria;D_1__Firmicutes;D_2__Clostridia;D_3__Clostridiales;D_4__Family XIII;__	0	0	0	0	0	0	0	0	0	0.0242943	0	0.00600118	0	0.0139606	0	0	0.00707734	0	0.0121976	0	0	0.0479083	0	0	0.00184441	0	0	0	0	0	0	0	0	0	0	0	0	0	0	0	0	0	0	0	0	0	0	0
D_0__Bacteria;D_1__Firmicutes;D_2__Clostridia;D_3__Clostridiales;D_4__Family XVIII;D_5__Symbiobacterium	0	0.0104119	0	0	0	0.019534	0.0130506	0	0	0	0	0.0300059	0	0	0.0109549	0	0	0	0	0	0	0	0.0358929	0.0193584	0	0	0	0	0	0.00562572	0.0118447	0.0240824	0	0	0	0.0224394	0	0	0	0	0	0	0	0	0	0.0471079	0	0.0087165
D_0__Bacteria;D_1__Firmicutes;D_2__Clostridia;D_3__Clostridiales;D_4__Family XVIII;D_5__uncultured	0	0	0	0.0220135	0	0	0	0	0	0	0	0	0	0	0	0	0	0	0	0	0	0	0	0	0	0	0	0	0	0	0	0	0	0	0	0	0	0	0	0	0	0	0	0	0	0	0	0
D_0__Bacteria;D_1__Firmicutes;D_2__Clostridia;D_3__Clostridiales;D_4__Family XVIII;__	0	0	0	0	0	0	0	0	0	0	0	0	0	0	0	0	0	0	0	0	0	0	0	0	0	0	0	0	0	0	0	0	0	0	0	0	0	0	0	0	0	0	0	0	0	0	0	0
D_0__Bacteria;D_1__Firmicutes;D_2__Clostridia;D_3__Clostridiales;D_4__Heliobacteriaceae;D_5__Hydrogenispora	0.00478958	0	0	0	0	0	0	0	0	0.0206952	0	0	0	0	0	0	0	0	0	0	0	0	0	0	0	0	0	0	0	0	0	0	0	0	0	0	0	0	0	0	0	0	0	0	0	0	0	0
D_0__Bacteria;D_1__Firmicutes;D_2__Clostridia;D_3__Clostridiales;D_4__Lachnospiraceae;D_5__Anaerocolumna	0	0	0	0	0	0	0	0	0	0	0	0	0	0	0	0	0	0	0	0	0	0	0	0	0	0	0	0	0	0	0	0	0	0	0	0	0	0	0	0	0	0	0	0	0	0	0	0
D_0__Bacteria;D_1__Firmicutes;D_2__Clostridia;D_3__Clostridiales;D_4__Lachnospiraceae;D_5__Fusicatenibacter	0	0	0	0	0	0	0	0	0	0	0	0	0	0	0	0	0	0	0	0	0	0	0	0	0	0	0	0.0381112	0	0	0	0	0	0	0	0	0	0	0	0	0	0	0	0	0	0	0	0
D_0__Bacteria;D_1__Firmicutes;D_2__Clostridia;D_3__Clostridiales;D_4__Lachnospiraceae;D_5__Herbinix	0.0223514	0.096547	0.0528438	0.0256824	0.0382865	0.126083	0	0	0	0.0593862	0	0.0216042	0.101908	0.0209409	0	0	0	0	0.0914817	0.0193485	0	0.0278177	0.0246764	0.0096792	0.0101442	0.108202	0	0	0	0.0984501	0.0544856	0	0	0	0	0.0652781	0.00833472	0	0	0.0060186	0.0082697	0.0279657	0	0.0454784	0	0.0100946	0	0.0101692
D_0__Bacteria;D_1__Firmicutes;D_2__Clostridia;D_3__Clostridiales;D_4__Lachnospiraceae;D_5__Lachnoclostridium 5	0	0	0	0	0	0	0	0	0	0	0	0	0	0	0	0	0	0	0	0	0	0	0	0	0	0	0	0	0	0	0	0	0	0.038629	0.0382763	0	0	0	0	0	0	0	0.00960069	0	0.0112499	0	0	0
D_0__Bacteria;D_1__Firmicutes;D_2__Clostridia;D_3__Clostridiales;D_4__Lachnospiraceae;D_5__Shuttleworthia	0	0	0	0	0	0	0	0	0	0	0	0	0	0	0	0	0	0	0	0	0	0	0	0	0	0	0	0	0	0	0	0	0	0	0	0	0	0	0	0	0	0	0	0	0	0	0	0
D_0__Bacteria;D_1__Firmicutes;D_2__Clostridia;D_3__Clostridiales;D_4__Lachnospiraceae;D_5__Syntrophococcus	0.0159653	0	0	0	0	0	0.00522023	0.0167069	0	0	0	0	0	0	0	0	0	0	0	0	0	0	0	0	0	0	0	0	0	0	0	0	0	0	0	0	0	0	0	0	0	0	0	0	0	0	0	0
D_0__Bacteria;D_1__Firmicutes;D_2__Clostridia;D_3__Clostridiales;D_4__Lachnospiraceae;D_5__[Eubacterium] hallii group	0	0	0	0	0	0	0	0	0	0	0	0	0	0	0	0	0	0	0	0	0	0	0	0	0	0	0	0	0	0	0	0	0	0	0	0	0	0	0	0	0	0	0	0	0	0	0	0
D_0__Bacteria;D_1__Firmicutes;D_2__Clostridia;D_3__Clostridiales;D_4__Lachnospiraceae;__	0.0894055	0.0984401	0.219898	0.165101	0.0978432	0.0976701	0.10571	0.133655	0.135395	0.195255	0.086769	0.123624	0	0.22337	0.137545	0.110059	0.157117	0.109484	0.149856	0.164463	0.0492908	0.168452	0.224331	0.235066	0.0165997	0.247318	0	0.201537	0.117233	0.461309	0.405088	0.130446	0	0	0	0	0	0	0.0167196	0.0110341	0	0.0314614	0	0	0	0	0	0.011622
D_0__Bacteria;D_1__Firmicutes;D_2__Clostridia;D_3__Clostridiales;D_4__Peptococcaceae;D_5__Peptococcus	0	0.0217704	0	0.0256824	0	0	0.0091354	0	0.0228837	0	0	0.00600118	0.00650477	0.00523524	0	0	0.066527	0.024033	0.0209101	0.0696547	0	0.032454	0	0	0.0405769	0	0	0.102707	0.0928097	0.0562572	0.075806	0	0.0458926	0.0831506	0.0510351	0.301911	0.100017	0	0.0501588	0.0561736	0	0	0	0.031485	0.0224997	0.0353309	0.0163681	0.136558
D_0__Bacteria;D_1__Firmicutes;D_2__Clostridia;D_3__Clostridiales;D_4__Peptostreptococcaceae;Ambiguous_taxa	0	0	0	0	0	0	0	0	0	0.0251941	0.0314021	0	0	0	0	0	0	0	0	0	0	0	0	0	0	0	0	0	0	0	0	0	0	0	0	0	0	0	0	0	0	0	0	0	0	0	0	0
D_0__Bacteria;D_1__Firmicutes;D_2__Clostridia;D_3__Clostridiales;D_4__Peptostreptococcaceae;D_5__Paraclostridium	0.0590715	0.0388081	0	0	0	0.0213098	0.0391517	0.0891034	0	0	0.0603251	0.0600118	0.0802255	0	0	0.0157227	0.0382176	0.0841155	0.126332	0.186713	0.0547675	0.0958165	0.130112	0.0898783	0.102365	0.0819241	0	0.0897875	0.307737	1.08295	0.618293	0.136467	0.0446178	0	0	0.0163195	0.0416736	0	0.0647885	0.0240744	0	0	0	0.0244884	0.0974988	0.0757091	0	0.0363187
D_0__Bacteria;D_1__Firmicutes;D_2__Clostridia;D_3__Clostridiales;D_4__Peptostreptococcaceae;D_5__Peptostreptococcus	0.389552	0.686241	0.876184	0.311858	0.846556	0.660605	0.45677	0.686839	0.61214	0.641551	0.690846	0.61452	0.201648	0.511308	0.617126	0.467749	2.33552	2.23907	1.59265	1.83327	1.28704	3.82957	1.87092	1.97732	0.777417	2.11921	0.0154079	1.59034	1.46542	7.90132	4.63838	1.78812	0.675641	0.178086	0.133967	0.563024	0.0250042	0.0369078	0.167196	0.222688	0.119911	0.0978799	0.024371	0.584222	0.314996	0.232175	0.0470583	0.143822
D_0__Bacteria;D_1__Firmicutes;D_2__Clostridia;D_3__Clostridiales;D_4__Peptostreptococcaceae;D_5__Proteocatella	0	0	0	0	0	0	0	0	0	0	0	0	0.0650477	0	0	0	0	0	0.0095838	0	0	0	0	0	0	0	0	0	0	0	0	0	0	0	0	0	0	0	0	0	0	0	0	0	0	0	0	0
D_0__Bacteria;D_1__Firmicutes;D_2__Clostridia;D_3__Clostridiales;D_4__Peptostreptococcaceae;D_5__Romboutsia	0.0478958	0.105066	0.0869365	0.0403581	0	0	0	0	0	0.0395908	0.0586724	0	0	0.0418819	0.0584261	0	0.108991	0	0.085383	0.172202	0.0383373	0.366266	0.172735	0.112002	0.0627098	0.265867	0	0.0568439	0	0.421929	0.371923	0.182625	0.0854112	0	0	0	0	0	0	0.133412	0	0	0	0.159174	0	0	0	0
D_0__Bacteria;D_1__Firmicutes;D_2__Clostridia;D_3__Clostridiales;D_4__Peptostreptococcaceae;__	0.632224	0.732622	0.990394	0.30452	0.49347	0.706777	0.626427	0.824206	0.606419	0.760323	0.7082	0.548508	0.468343	0.654405	0.576958	0.450061	1.36734	1.44599	1.61792	2.12157	1.35276	7.67305	2.46315	2.60647	1.25973	2.63703	0.0178408	1.0135	1.57776	8.09823	4.86343	2.65508	0.692214	0.207549	0.797423	1.86655	0.970995	0.150986	0.783732	0.396224	0.22466	0.632723	0.0635122	0.626203	0.592493	1.19957	0.194371	1.16365
D_0__Bacteria;D_1__Firmicutes;D_2__Clostridia;D_3__Clostridiales;D_4__Ruminococcaceae;D_5__CAG-352	0	0	0	0	0	0	0	0	0	0	0	0	0	0	0	0	0	0	0	0	0	0	0	0	0	0	0	0	0	0	0	0	0	0	0	0	0	0	0	0	0	0	0	0	0	0	0	0
D_0__Bacteria;D_1__Firmicutes;D_2__Clostridia;D_3__Clostridiales;D_4__Ruminococcaceae;D_5__Caproiciproducens	0.0111757	0	0.110801	0	0.0170162	0.00710328	0.0261011	0.0148506	0	0.0179958	0.0247911	0.0264052	0.0216826	0.0349016	0.0267787	0.00393066	0	0	0	0.00677199	0	0.00618171	0	0.0276549	0	0	0	0	0	0	0	0	0.0356943	0.0117851	0.0574144	0.0897575	0	0.0218092	0.0919579	0.0491519	0.0454834	0	0	0.190659	0.0112499	0.143006	0.0225062	0
D_0__Bacteria;D_1__Firmicutes;D_2__Clostridia;D_3__Clostridiales;D_4__Ruminococcaceae;D_5__Ethanoligenens	0.102178	0.0993866	0.131257	0.179777	0.17867	0.0230857	0.240131	0.202339	0.158279	0.051288	0.057846	0.0372073	0.0173461	0.0575876	0.114418	0.0314453	0.0481259	0.153544	0.186449	0.155756	0.142396	0	0	0	0	0	0	0	0	0	0.0544856	0.144494	0	0	0	0	0	0	0	0	0	0	0	0	0	0	0	0
D_0__Bacteria;D_1__Firmicutes;D_2__Clostridia;D_3__Clostridiales;D_4__Ruminococcaceae;D_5__Negativibacillus	0	0	0	0	0	0	0	0	0	0	0	0	0	0	0	0	0	0	0	0	0	0	0.0112165	0	0	0.00463722	0	0	0	0	0	0	0	0	0	0	0	0	0	0	0	0	0	0	0	0	0	0
D_0__Bacteria;D_1__Firmicutes;D_2__Clostridia;D_3__Clostridiales;D_4__Ruminococcaceae;D_5__Oscillibacter	0	0	0.0110801	0	0	0	0	0.0148506	0.0171628	0	0.0190065	0	0	0	0	0	0	0	0	0	0	0	0	0	0	0	0	0	0	0	0	0	0	0	0	0	0	0	0	0	0	0	0	0	0	0	0	0
D_0__Bacteria;D_1__Firmicutes;D_2__Clostridia;D_3__Clostridiales;D_4__Ruminococcaceae;D_5__Ruminiclostridium	0	0	0	0	0	0	0	0	0	0	0	0	0	0	0	0	0	0	0	0	0	0.0247268	0	0.0165929	0	0	0	0	0	0	0	0	0	0	0	0	0	0	0	0	0	0	0	0	0	0	0	0
D_0__Bacteria;D_1__Firmicutes;D_2__Clostridia;D_3__Clostridiales;D_4__Ruminococcaceae;D_5__Ruminococcaceae UCG-008	0	0	0	0	0	0	0	0	0	0	0.0115692	0	0	0	0.0146065	0	0	0	0	0	0	0	0	0	0	0	0	0	0	0	0	0	0	0	0	0	0	0	0	0	0	0	0	0	0	0	0	0
D_0__Bacteria;D_1__Firmicutes;D_2__Clostridia;D_3__Clostridiales;D_4__Ruminococcaceae;D_5__Ruminococcaceae UCG-012	0	0	0	0	0	0	0	0	0.0228837	0	0	0	0	0	0	0	0	0	0	0	0	0	0	0	0	0	0	0	0	0	0	0	0	0	0	0	0	0	0	0	0	0	0	0	0	0	0	0
D_0__Bacteria;D_1__Firmicutes;D_2__Clostridia;D_3__Clostridiales;D_4__Ruminococcaceae;D_5__Ruminococcus 1	0.00798263	0	0	0	0	0.00710328	0	0	0	0	0	0	0	0	0	0	0	0	0.00174251	0	0	0	0	0	0	0	0	0	0	0	0.0568545	0	0	0	0	0	0	0	0	0	0.0082697	0.0104871	0	0	0	0	0	0
D_0__Bacteria;D_1__Firmicutes;D_2__Clostridia;D_3__Clostridiales;D_4__Ruminococcaceae;D_5__[Eubacterium] coprostanoligenes group	0	0.00851886	0	0	0	0	0	0.0092816	0.0133488	0	0.00743734	0	0.0303556	0	0	0.00786133	0.00707734	0	0.0182963	0.0222508	0.043814	0.0386357	0.0471095	0.0373341	0.00922203	0.0463722	0	0	0.0146542	0.0562572	0	0.0100343	0	0	0	0	0	0.00503288	0	0	0	0	0	0.02099	0	0	0	0
D_0__Bacteria;D_1__Firmicutes;D_2__Clostridia;D_3__Clostridiales;D_4__Ruminococcaceae;D_5__uncultured	0	0	0	0	0	0	0	0	0	0	0	0	0	0	0	0	0	0	0	0	0	0	0	0	0	0	0	0	0	0	0	0	0	0	0	0	0	0	0	0	0	0	0	0	0	0	0	0
D_0__Bacteria;D_1__Firmicutes;D_2__Clostridia;D_3__Clostridiales;D_4__Ruminococcaceae;__	0.0239479	0.129676	0.0349451	0	0.0297784	0.00710328	0.0469821	0.0259885	0	0.175459	0.0280966	0	0.0195143	0	0.0292131	0.125781	0	0	0.0104551	0.0599805	0	0.188542	0.143572	0.0331858	83.452	0.0278233	0	0.22027	0.0390778	0.205339	0.274797	0.0200686	0.00764877	0	0	0.791498	0	0.00838814	0	0.0040124	0	0.0157307	0	0.283365	0.0112499	0.0572025	0.00409203	0.0101692
D_0__Bacteria;D_1__Firmicutes;D_2__Clostridia;D_3__Clostridiales;__;__	0	0	0	0	0.0297784	0	0	0.00556896	0	0	0	0	0	0	0.00608606	0.0275146	0.0198166	0	0	0.0280554	0	0.149907	0.130112	0	0	0.071104	0	0	0.034193	0.0225029	0	0.0381304	0	0	0	0	0	0	0	0	0	0	0	0.02099	0	0	0	0
D_0__Bacteria;D_1__Firmicutes;D_2__Clostridia;D_3__M55-D21;D_4__uncultured Firmicutes bacterium;D_5__uncultured Firmicutes bacterium	0	0	0	0	0	0	0	0	0	0	0	0	0	0	0	0	0	0	0.0165538	0	0	0.0849985	0	0	0	0	0	0	0.0537319	0	0	0	0	0.0170229	0	0	0	0	0	0	0	0	0	0	0	0	0	0
D_0__Bacteria;D_1__Firmicutes;D_2__Clostridia;D_3__Thermoanaerobacterales;D_4__Family III;D_5__Tepidanaerobacter	0.0063861	0.00189308	0	0	0	0	0	0.0259885	0.0305116	0	0	0	0	0	0	0	0	0	0	0	0	0.021636	0.0762725	0.00276549	0	0	0	0	0	0	0.0497477	0	0	0	0	0	0	0	0.0104498	0	0	0	0	0.0349834	0	0.0269188	0.00613804	0.011622
D_0__Bacteria;D_1__Firmicutes;D_2__Clostridia;D_3__Thermoanaerobacterales;D_4__Family III;D_5__Thermoanaerobacterium	0	0.0170377	0.0596623	0	0	0	0.0104405	0.00742528	0	0	0	0	0	0	0.0109549	0	0	0	0	0	0	0	0.0358929	0.0179757	0	0	0	0	0	0	0	0	0	0	0	0	0	0.00838814	0	0	0	0	0	0	0	0	0	0
D_0__Bacteria;D_1__Firmicutes;D_2__Clostridia;D_3__Thermoanaerobacterales;D_4__SRB2;D_5__uncultured bacterium	0	0	0	0	0	0	0	0	0	0	0	0	0	0	0	0	0	0	0	0	0	0	0	0	0	0	0	0	0	0	0	0	0	0	0	0	0	0	0	0	0	0	0	0	0	0	0	0
D_0__Bacteria;D_1__Firmicutes;D_2__Clostridia;D_3__Thermoanaerobacterales;D_4__Thermoanaerobacteraceae;D_5__Caldanaerobacter	0	0	0	0	0	0	0	0	0	0	0	0	0	0	0.00486885	0	0	0	0	0	0	0	0	0	0	0	0	0	0	0	0	0	0	0	0	0	0	0	0	0	0	0	0	0	0	0.00504728	0	0
D_0__Bacteria;D_1__Firmicutes;D_2__Erysipelotrichia;D_3__Erysipelotrichales;D_4__Erysipelotrichaceae;D_5__Asteroleplasma	0	0	0.0323881	0	0	0	0.00391517	0	0	0	0	0	0	0	0	0	0	0	0	0	0	0	0	0	0	0	0	0	0	0	0	0	0	0	0	0	0	0	0	0	0	0	0	0	0	0	0	0
D_0__Bacteria;D_1__Firmicutes;D_2__Erysipelotrichia;D_3__Erysipelotrichales;D_4__Erysipelotrichaceae;D_5__Erysipelothrix	0	0	0	0	0	0	0	0	0	0	0.0057846	0.00480094	0	0	0	0	0	0	0	0	0	0	0.0448662	0.00829646	0	0	0	0	0	0	0	0	0	0	0	0	0	0	0	0	0.00551314	0	0	0	0	0	0	0
D_0__Bacteria;D_1__Firmicutes;D_2__Erysipelotrichia;D_3__Erysipelotrichales;D_4__Erysipelotrichaceae;D_5__Erysipelotrichaceae UCG-004	0	0	0	0	0	0	0	0	0.0247907	0	0	0	0	0.00872539	0.00852048	0	0	0	0	0	0	0	0	0	0	0	0	0	0	0	0	0	0	0.00261892	0.00637938	0	0	0	0	0	0.0413485	0	0	0	0	0	0	0
D_0__Bacteria;D_1__Firmicutes;D_2__Erysipelotrichia;D_3__Erysipelotrichales;D_4__Erysipelotrichaceae;D_5__Erysipelotrichaceae UCG-009	0	0	0	0	0	0	0.00391517	0	0.00572093	0.00629853	0	0	0	0.0593327	0	0	0.0297248	0	0	0.0116091	0	0	0.0897324	0.0705199	0	0.0200946	0	0	0.0244236	0	0	0.0120412	0	0	0	0	0	0	0	0	0	0	0	0.0524751	0	0	0	0
D_0__Bacteria;D_1__Firmicutes;D_2__Erysipelotrichia;D_3__Erysipelotrichales;D_4__Erysipelotrichaceae;D_5__Solobacterium	0.0702471	0.0444874	0.0306835	0	0.0170162	0.0408439	0.0156607	0.0167069	0	0.0368914	0.105776	0	0.0910668	0.0994695	0.0754671	0	0	0	0	0	0	0	0	0	0	0	0	0	0	0	0	0	0	0.0379743	0	0	0	0	0	0.0090279	0	0	0	0	0	0.011777	0	0
D_0__Bacteria;D_1__Firmicutes;D_2__Erysipelotrichia;D_3__Erysipelotrichales;D_4__Erysipelotrichaceae;D_5__Turicibacter	0	0	0	0	0	0	0	0	0	0	0	0	0	0	0	0	0	0	0	0	0	0	0	0.0124447	0	0	0	0	0	0	0	0	0	0	0	0	0	0	0	0	0	0	0	0	0	0	0	0
D_0__Bacteria;D_1__Firmicutes;D_2__Erysipelotrichia;D_3__Erysipelotrichales;D_4__Erysipelotrichaceae;D_5__uncultured	0.0207548	0.0558458	0.0357974	0.0843851	0.0255243	0.0426197	0.0261011	0.100241	0.0972559	0.0503883	0.0479295	0.0300059	0.0216826	0.022686	0.0426024	0.0510986	0.155702	0.249676	0.182092	0.172202	0.230024	0.239541	0.509231	0.394082	0.0378103	0.378706	0.00324378	0.014211	0.102579	0.191275	0.210836	0.290995	0.0216715	0	0	0	0	0	0	0	0	0	0	0	0	0	0	0
D_0__Bacteria;D_1__Firmicutes;D_2__Erysipelotrichia;D_3__Erysipelotrichales;D_4__Erysipelotrichaceae;__	0	0	0.0843796	0	0	0	0	0	0	0	0.0057846	0	0	0	0.0121721	0.0137573	0	0	0	0	0	0.0262723	0.0919757	0.0179757	0	0	0	0	0	0	0.0426409	0	0	0	0	0	0	0	0.0146297	0	0	0	0	0	0	0	0	0.0101692
D_0__Bacteria;D_1__Firmicutes;D_2__Negativicutes;D_3__Selenomonadales;D_4__Acidaminococcaceae;D_5__Acidaminococcus	0.0159653	0	0	0.0110068	0	0	0.0208809	0	0	0	0	0	0	0	0	0	0	0	0	0	0	0	0	0	0	0	0	0	0	0	0	0	0	0.00392837	0.0765526	0	0	0	0	0	0	0	0	0	0	0	0	0
D_0__Bacteria;D_1__Firmicutes;D_2__Negativicutes;D_3__Selenomonadales;D_4__Acidaminococcaceae;D_5__Phascolarctobacterium	0	0	0	0.0293513	0	0.0213098	0	0	0	0.00719832	0	0	0	0	0	0	0	0	0	0	0	0.0247268	0.029163	0	0	0.0324605	0	0	0	0	0	0	0	0	0	0	0	0	0	0	0	0	0	0	0	0	0	0
D_0__Bacteria;D_1__Firmicutes;D_2__Negativicutes;D_3__Selenomonadales;D_4__Acidaminococcaceae;D_5__uncultured	0.0271409	0.0160912	0	0	0	0	0	0.0129942	0	0	0.0231384	0.00720141	0	0.0506073	0.0219098	0	0.0254784	0	0.0383352	0.0628827	0	0.086544	0.127869	0.129978	0.0184441	0.248864	0	0	0.0146542	0.00843858	0	0	0	0	0	0	0	0	0.0355292	0.0110341	0	0	0	0.00524751	0	0	0	0.0653737
D_0__Bacteria;D_1__Firmicutes;D_2__Negativicutes;D_3__Selenomonadales;D_4__Acidaminococcaceae;__	0	0	0	0	0	0	0	0	0	0	0	0	0	0	0	0	0	0.0226978	0	0	0	0	0	0	0	0	0	0	0	0	0	0	0	0	0	0	0	0	0	0	0	0	0	0	0	0	0	0
D_0__Bacteria;D_1__Firmicutes;D_2__Negativicutes;D_3__Selenomonadales;D_4__Veillonellaceae;D_5__Allisonella	0	0	0.00937551	0	0	0	0.0339315	0	0	0	0	0.00480094	0	0	0	0.017688	0	0	0	0	0	0	0	0	0	0	0	0	0	0	0	0	0	0	0	0	0	0	0	0	0	0	0	0	0	0	0	0
D_0__Bacteria;D_1__Firmicutes;D_2__Negativicutes;D_3__Selenomonadales;D_4__Veillonellaceae;D_5__Dialister	0.0415097	0.0340754	0	0.0256824	0	0.0266373	0.0169657	0.00371264	0	0.0665845	0.0520614	0.0168033	0	0.0279213	0.0194754	0.0491333	0.0127392	0	0	0.059013	0	0	0	0	0	0	0	0	0	0	0	0.0100343	0.0382438	0	0	0.0183595	0	0	0	0	0	0	0	0.0717159	0	0	0	0.00726375
D_0__Bacteria;D_1__Firmicutes;D_2__Negativicutes;D_3__Selenomonadales;D_4__Veillonellaceae;D_5__Megasphaera	0.52845	0.582122	0.546336	0.381567	0.455184	0.534522	0.552039	0.517913	0.602605	0.405805	0.610688	0.319263	0.394623	0.485132	0.486885	0.546362	0.118899	0.126841	0	0.0406319	0.0109535	0.00927257	0.0201898	0.0179757	0.00922203	0	0	0	0.0928097	0	0.075806	0.144494	0.0127479	0.0301175	0	0.0428388	0	0.00503288	0	0.0190589	0.0813187	0.012235	0	0.416302	0	0.0420606	0.0132991	0.0188857
D_0__Bacteria;D_1__Firmicutes;D_2__Negativicutes;D_3__Selenomonadales;D_4__Veillonellaceae;D_5__Mitsuokella	0.0542819	0.0956005	0	0.106399	0	0.0230857	0.0326264	0.0723965	0.158279	0	0.0123956	0.0600118	0	0.0523524	0.0681638	0.023584	0.0410486	0	0	0	0	0	0	0	0	0	0	0	0	0	0	0.0421441	0	0	0	0	0	0	0	0	0	0	0	0	0	0	0	0
D_0__Bacteria;D_1__Firmicutes;D_2__Negativicutes;D_3__Selenomonadales;D_4__Veillonellaceae;D_5__Pectinatus	0	0	0	0	0	0	0	0	0	0	0	0	0	0	0	0	0	0	0	0	0	0	0	0	0	0	0	0	0	0	0	0	0	0	0	0	0	0	0	0	0	0	0	0	0	0	0	0
D_0__Bacteria;D_1__Firmicutes;D_2__Negativicutes;D_3__Selenomonadales;D_4__Veillonellaceae;D_5__Selenomonas	0	0	0	0	0.0127622	0	0.0574225	0.046408	0	0	0.0710679	0	0.00650477	0.108195	0.046254	0	0	0	0	0	0	0	0	0	0	0	0	0	0	0	0	0	0	0	0	0	0	0	0	0	0	0	0	0	0	0	0	0
D_0__Bacteria;D_1__Firmicutes;D_2__Negativicutes;D_3__Selenomonadales;D_4__Veillonellaceae;D_5__Thermosinus	0	0	0	0	0.0127622	0	0	0	0	0	0	0	0	0	0	0	0	0	0	0	0	0	0	0	0	0	0	0	0.034193	0	0	0	0	0	0	0	0	0	0	0	0	0	0	0	0	0.0067297	0	0
D_0__Bacteria;D_1__Firmicutes;D_2__Negativicutes;D_3__Selenomonadales;D_4__Veillonellaceae;D_5__Veillonella	0.0750367	0.0605785	0.0767087	0.0623716	0.0467946	0	0.045677	0.102098	0	0.0359916	0.0462768	0.0456089	0.0867303	0.00523524	0.0827704	0.0648559	0.12173	0	0.0688291	0.0609479	0	0	0.0157032	0	0.00553322	0	0	0	0	0	0	0.0321098	0	0	0	0	0	0	0	0	0	0	0	0	0	0	0	0
D_0__Bacteria;D_1__Firmicutes;D_2__Negativicutes;D_3__Selenomonadales;D_4__Veillonellaceae;D_5__Zymophilus	0	0	0	0	0	0	0	0	0	0	0	0	0	0	0	0	0.00990828	0	0	0	0	0	0	0	0	0	0	0	0	0	0	0	0	0	0	0	0	0	0	0	0	0	0	0	0	0	0	0
D_0__Bacteria;D_1__Firmicutes;D_2__Negativicutes;D_3__Selenomonadales;D_4__Veillonellaceae;__	0	0	0	0	0	0	0.0274062	0	0	0.00719832	0.0190065	0.0120024	0	0	0	0.0196533	0	0	0	0	0	0	0	0	0	0	0	0	0	0	0	0	0	0	0	0	0	0	0	0	0	0	0	0	0	0	0	0
D_0__Bacteria;D_1__Firmicutes;__;__;__;__	0.0574749	0	0.098869	0	0	0	0.00652529	0	0.0171628	0	0	0	0	0	0.00608606	0	0	0	0	0	0.0383373	0	0	0.0318031	0	0.0386435	0	0	0	0	0	0	0	0	0	0	0	0	0	0	0	0	0	0	0	0	0	0
D_0__Bacteria;D_1__Fusobacteria;D_2__Fusobacteriia;D_3__Fusobacteriales;D_4__Fusobacteriaceae;D_5__Cetobacterium	0.29855	0.469484	0.293198	0.179777	0.1574	0.204219	0.22708	0.213477	0.230744	0.162862	0.104123	0.20524	0.190807	0.21988	0.192319	0.21029	0.433133	0.222973	0.0967093	0.620121	0.2355	1.05244	1.1553	1.27351	0.19274	1.1593	0	0.0290679	0.708284	0.469748	0.165826	0.577977	0.0216715	0	0	0.0326391	0	0	0.00835981	0.0320992	0	0.0262178	0.00812366	0.271121	0	0.0370134	0.0112531	0.0435825
D_0__Bacteria;D_1__Fusobacteria;D_2__Fusobacteriia;D_3__Fusobacteriales;D_4__Fusobacteriaceae;D_5__Fusobacterium	1.64283	1.46619	1.37905	1.6877	1.24644	1.3585	1.64307	1.98998	1.65144	1.58273	0.83794	1.5483	0.581093	0.952813	1.32067	1.55065	3.16499	2.0842	1.39924	3.07835	1.74708	4.56674	7.08437	6.7146	0.500756	8.7396	0.00162189	0.445062	2.48144	2.68347	4.59574	2.99023	0.107083	0.0320817	0.0765526	0.34475	0.0833472	0.0603946	0.330212	0.14244	0	0.117106	0.0155088	0.507259	0.149998	0.309566	0.0214832	0.310888
D_0__Bacteria;D_1__Fusobacteria;D_2__Fusobacteriia;D_3__Fusobacteriales;D_4__Fusobacteriaceae;D_5__Ilyobacter	0	0	0	0	0	0	0	0	0	0	0	0	0	0	0	0	0	0	0	0	0	0	0	0.0511615	0.00737762	0	0	0	0	0	0	0.0240824	0	0	0	0	0	0	0	0	0	0	0	0	0	0	0	0
D_0__Bacteria;D_1__Fusobacteria;D_2__Fusobacteriia;D_3__Fusobacteriales;D_4__Fusobacteriaceae;D_5__Propionigenium	0	0.0312358	0	0	0	0	0	0	0.0228837	0	0	0	0	0	0	0	0	0	0	0.072557	0	0	0	0	0	0	0	0	0	0	0	0	0	0	0	0	0	0	0	0	0	0	0	0	0	0	0	0
D_0__Bacteria;D_1__Fusobacteria;D_2__Fusobacteriia;D_3__Fusobacteriales;D_4__Fusobacteriaceae;D_5__Psychrilyobacter	1.009	1.22104	0.337518	1.04564	0.867827	0.969598	1.00098	0.844626	1.12702	1.06715	0.899918	0.830563	1.17303	0.640444	0.918995	1.11631	0.314234	0.379187	0.314523	0.55627	0.158826	1.78188	1.73183	1.71184	0.185363	1.7235	0.0129751	0.0742846	0.947636	0.981688	0.954682	0.579984	0.657794	0.354863	0.740008	1.53812	0.258376	0.248289	1.09722	0.480485	0.228795	0.457938	0.0494805	2.4296	0.228747	0.709984	0.129922	0.749619
D_0__Bacteria;D_1__Fusobacteria;D_2__Fusobacteriia;D_3__Fusobacteriales;D_4__Fusobacteriaceae;__	0	0	0	0	0	0	0	0	0	0	0	0	0	0	0	0	0.0226475	0	0	0	0	0	0	0	0	0	0	0	0	0	0.0331651	0	0	0	0	0	0	0	0	0	0	0	0	0	0	0	0	0
D_0__Bacteria;D_1__Fusobacteria;D_2__Fusobacteriia;D_3__Fusobacteriales;D_4__Leptotrichiaceae;D_5__Hypnocyclicus	0	0.00757232	0	0.0183446	0	0	0.0261011	0	0	0.00269937	0	0	0	0.0698032	0.0255614	0	0	0	0	0	0	0	0	0	0	0	0	0	0	0	0	0	0	0	0	0	0	0	0	0.0060186	0	0	0	0	0	0	0	0.046488
D_0__Bacteria;D_1__Gemmatimonadetes;D_2__BD2-11 terrestrial group;Ambiguous_taxa;Ambiguous_taxa;Ambiguous_taxa	0	0	0	0.0110068	0	0.019534	0.00522023	0	0	0	0.0057846	0	0	0	0	0	0	0	0	0	0	0	0	0	0	0	0	0	0	0	0	0	0	0	0	0	0	0	0	0	0	0	0	0	0	0	0	0
D_0__Bacteria;D_1__Gemmatimonadetes;D_2__Gemmatimonadetes;D_3__Gemmatimonadales;D_4__Gemmatimonadaceae;D_5__Gemmatimonas	0	0.0151446	0	0	0	0	0	0	0	0	0	0	0	0	0	0	0	0	0	0	0	0	0	0	0	0	0	0	0	0	0	0	0	0	0	0	0	0	0	0	0	0	0	0.0384817	0	0	0	0
D_0__Bacteria;D_1__Gemmatimonadetes;D_2__Gemmatimonadetes;D_3__Gemmatimonadales;D_4__Gemmatimonadaceae;D_5__uncultured	0	0	0	0	0	0	0	0	0	0	0	0	0	0	0	0	0	0	0.0304939	0	0.0164303	0	0	0	0	0	0	0	0	0	0	0	0	0	0	0	0	0	0	0	0	0	0	0	0	0	0	0
D_0__Bacteria;D_1__Hydrogenedentes;D_2__Hydrogenedentia;D_3__Hydrogenedentiales;D_4__Hydrogenedensaceae;D_5__uncultured bacterium	0	0	0	0	0	0	0	0	0	0	0	0	0	0	0	0	0	0	0	0	0	0	0	0	0	0	0	0	0	0	0	0	0	0	0	0	0	0	0	0	0	0	0	0	0	0	0	0
D_0__Bacteria;D_1__Margulisbacteria;D_2__uncultured bacterium;D_3__uncultured bacterium;D_4__uncultured bacterium;D_5__uncultured bacterium	0	0	0	0	0	0	0	0	0	0	0	0	0	0	0	0	0	0	0	0	0	0	0	0	0	0	0	0	0	0	0	0	0	0	0	0	0	0	0	0	0	0	0	0	0	0	0	0
D_0__Bacteria;D_1__Marinimicrobia (SAR406 clade);Ambiguous_taxa;Ambiguous_taxa;Ambiguous_taxa;Ambiguous_taxa	0.0462993	0	0	0	0	0	0.00522023	0	0	0.00719832	0	0	0	0	0	0	0	0	0	0	0	0	0	0	0	0	0	0	0	0	0	0	0	0	0	0	0	0	0	0	0	0	0	0	0	0	0	0
D_0__Bacteria;D_1__Marinimicrobia (SAR406 clade);D_2__uncultured bacterium;D_3__uncultured bacterium;D_4__uncultured bacterium;D_5__uncultured bacterium	0	0	0	0	0	0	0	0	0	0	0	0	0	0	0	0	0	0	0	0	0	0	0	0	0	0	0	0	0	0	0	0	0	0	0	0	0	0	0	0	0	0	0	0	0	0	0	0
D_0__Bacteria;D_1__Marinimicrobia (SAR406 clade);D_2__uncultured eubacterium OCS146;D_3__uncultured eubacterium OCS146;D_4__uncultured eubacterium OCS146;D_5__uncultured eubacterium OCS146	0	0	0	0.0146757	0	0	0	0	0	0	0	0	0	0	0	0	0	0	0	0	0	0	0	0	0	0	0	0	0	0	0	0	0	0	0	0	0	0.0100658	0	0	0	0.0314614	0	0.0384817	0	0	0.00613804	0.0145275
D_0__Bacteria;D_1__Marinimicrobia (SAR406 clade);D_2__uncultured marine bacterium;D_3__uncultured marine bacterium;D_4__uncultured marine bacterium;D_5__uncultured marine bacterium	0	0	0	0	0	0	0	0	0	0	0	0	0	0	0	0	0	0	0	0	0	0	0	0	0	0	0	0	0	0	0	0	0	0	0	0	0	0	0	0	0	0	0	0	0	0	0	0
D_0__Bacteria;D_1__Marinimicrobia (SAR406 clade);__;__;__;__	0	0	0	0	0	0	0	0.00371264	0	0	0	0	0	0	0	0	0	0	0	0	0	0	0	0.0138274	0	0	0	0	0	0	0	0	0	0	0	0	0	0	0	0	0	0	0	0.0227392	0	0	0	0
D_0__Bacteria;D_1__Nitrospinae;D_2__Nitrospinia;D_3__Nitrospinales;D_4__Nitrospinaceae;D_5__LS-NOB	0	0	0	0	0	0	0	0	0.0133488	0.0197954	0	0	0	0	0	0	0	0	0	0	0	0	0	0	0	0	0	0	0	0	0	0	0	0	0	0	0	0	0	0	0	0	0	0	0	0	0	0
D_0__Bacteria;D_1__Nitrospirae;D_2__Nitrospira;D_3__Nitrospirales;D_4__Nitrospiraceae;D_5__Nitrospira	0	0	0	0	0	0	0.00391517	0	0	0	0	0	0	0	0	0	0	0	0	0	0	0	0	0	0	0	0	0	0	0	0	0	0	0	0	0	0	0	0	0	0	0	0	0	0	0	0	0
D_0__Bacteria;D_1__Omnitrophicaeota;D_2__Omnitrophia;D_3__Omnitrophales;D_4__Omnitrophaceae;D_5__Candidatus Omnitrophus	0	0	0	0	0	0	0	0	0	0	0	0	0	0	0	0	0	0	0	0	0	0	0	0	0	0	0	0	0	0	0	0	0	0	0	0	0	0	0	0	0	0	0	0	0	0	0	0
D_0__Bacteria;D_1__Patescibacteria;D_2__ABY1;D_3__Candidatus Kerfeldbacteria;D_4__uncultured bacterium;D_5__uncultured bacterium	0	0	0	0	0	0	0	0	0	0	0	0	0	0	0	0	0	0	0	0	0	0	0	0.00414823	0	0	0	0	0	0	0	0	0	0	0	0	0	0	0	0	0	0	0	0	0	0	0	0
D_0__Bacteria;D_1__Patescibacteria;D_2__ABY1;D_3__Candidatus Magasanikbacteria;D_4__uncultured bacterium;D_5__uncultured bacterium	0	0.0141981	0	0	0	0	0	0	0	0	0	0.0396078	0	0	0	0	0	0	0	0	0	0	0	0	0	0	0	0	0	0	0	0	0	0	0	0	0	0	0	0	0	0	0	0	0	0	0	0
D_0__Bacteria;D_1__Patescibacteria;D_2__ABY1;D_3__Candidatus Magasanikbacteria;__;__	0	0	0	0	0	0	0	0	0	0	0	0	0	0	0	0	0	0	0	0	0	0	0	0	0	0	0	0.0245462	0	0	0	0	0	0	0	0	0	0	0	0	0	0	0	0	0	0	0	0
D_0__Bacteria;D_1__Patescibacteria;D_2__ABY1;D_3__Candidatus Uhrbacteria;D_4__Candidatus Uhrbacteria bacterium GW2011_GWA2_53_10;D_5__Candidatus Uhrbacteria bacterium GW2011_GWA2_53_10	0	0	0	0	0	0	0	0	0	0	0	0.0288056	0	0	0	0	0	0	0	0.0193485	0	0	0	0	0	0	0	0	0	0	0	0	0	0	0	0	0	0	0	0	0	0	0	0	0	0	0	0
D_0__Bacteria;D_1__Patescibacteria;D_2__ABY1;__;__;__	0	0.0047327	0	0	0	0	0	0	0	0	0	0	0	0	0	0	0	0	0	0	0	0	0	0	0	0.0309148	0	0	0	0	0	0.0321098	0	0	0	0	0	0	0	0	0	0	0	0	0	0	0	0
D_0__Bacteria;D_1__Patescibacteria;D_2__Berkelbacteria;D_3__uncultured soil bacterium;D_4__uncultured soil bacterium;D_5__uncultured soil bacterium	0	0	0	0	0	0	0	0	0	0	0	0	0	0	0	0	0	0	0	0	0	0	0	0	0	0	0	0	0	0	0	0	0	0	0	0.0122397	0	0	0	0	0	0	0	0	0	0	0	0
D_0__Bacteria;D_1__Patescibacteria;D_2__Gracilibacteria;Ambiguous_taxa;Ambiguous_taxa;Ambiguous_taxa	0	0	0	0	0	0	0.00652529	0	0	0	0	0	0	0.00349016	0	0	0	0.00534067	0	0.0338599	0	0	0	0	0	0	0	0	0.0244236	0	0	0	0.00254959	0	0	0	0	0	0	0	0	0	0	0	0	0	0	0.005811
D_0__Bacteria;D_1__Patescibacteria;D_2__Gracilibacteria;D_3__Absconditabacteriales (SR1);Ambiguous_taxa;Ambiguous_taxa	0	0.0265031	0	0	0	0	0	0	0.0247907	0.0692839	0	0	0.18647	0.0122156	0	0	0.0169856	0	0.0121976	0.0261205	0	0	0	0	0	0.0200946	0.00324378	0	0.00976944	0.168772	0.00710682	0.0200686	0	0	0.0159485	0	0	0	0.0167196	0.060186	0	0	0	0.0122442	0.101249	0	0	0
D_0__Bacteria;D_1__Patescibacteria;D_2__Gracilibacteria;D_3__Candidatus Peribacteria;D_4__Candidatus Peribacteria bacterium GW2011_GWC2_54_8;D_5__Candidatus Peribacteria bacterium GW2011_GWC2_54_8	0	0.0141981	0.0460252	0	0	0	0.0104405	0	0.0152558	0.0251941	0	0	0	0	0.00730327	0	0	0	0	0	0	0	0.00897324	0	0	0	0	0	0	0	0	0	0	0	0	0	0	0	0	0	0	0	0	0	0	0	0	0
D_0__Bacteria;D_1__Patescibacteria;D_2__Gracilibacteria;D_3__Candidatus Peribacteria;D_4__uncultured bacterium;D_5__uncultured bacterium	0	0.035022	0.215637	0.0293513	0	0.0852394	0.0261011	0.0204195	0.0591163	0.0521878	0.0404922	0.0228045	0.0910668	0	0.0559917	0.0314453	0.0127392	0	0.0531465	0.0628827	0	0.0633625	0.0179465	0.0331858	0.0119886	0.159211	0	0.218978	0.0830403	0.0112514	0.0497477	0.0481647	0.0981592	0.0281533	0.156295	0	0.0541757	0.0150986	0	0.0280868	0.0206743	0.0227221	0	0.0437292	0.0149998	0.0740267	0.00306902	0.120578
D_0__Bacteria;D_1__Patescibacteria;D_2__Gracilibacteria;D_3__Candidatus Peribacteria;__;__	0	0	0	0	0	0	0	0	0	0	0	0	0	0.00349016	0	0	0	0	0	0	0.0164303	0.0200906	0	0	0	0	0	0.120793	0	0	0	0.0120412	0	0	0.0318969	0.0163195	0	0	0	0	0	0.0297135	0	0	0.0187498	0	0	0
D_0__Bacteria;D_1__Patescibacteria;D_2__Gracilibacteria;D_3__JGI 0000069-P22;D_4__uncultured Epsilonproteobacteria bacterium;D_5__uncultured Epsilonproteobacteria bacterium	0	0	0	0	0	0.00532746	0	0.0129942	0	0	0	0	0	0	0	0	0	0	0	0.00193485	0	0	0	0	0	0	0	0	0	0	0	0	0	0	0	0	0	0	0	0	0	0	0	0	0	0	0	0
D_0__Bacteria;D_1__Patescibacteria;D_2__Gracilibacteria;__;__;__	0	0	0	0	0	0	0	0	0	0	0	0	0	0	0	0	0	0	0	0	0	0	0	0	0	0	0	0	0	0	0	0	0	0	0	0	0	0	0	0	0	0	0	0	0	0	0	0
D_0__Bacteria;D_1__Patescibacteria;D_2__Microgenomatia;D_3__Candidatus Amesbacteria;D_4__Microgenomates bacterium SCGC AAA011-B20;D_5__Microgenomates bacterium SCGC AAA011-B20	0	0	0	0	0	0	0	0	0	0	0	0	0	0	0	0	0	0	0	0	0	0	0	0	0	0	0	0	0	0	0	0	0	0	0	0	0	0	0	0	0	0	0	0	0	0	0	0
D_0__Bacteria;D_1__Patescibacteria;D_2__Microgenomatia;D_3__Candidatus Amesbacteria;__;__	0	0	0	0	0	0	0	0	0	0.021595	0	0	0	0	0	0	0	0	0	0	0	0	0	0	0	0	0	0	0	0	0	0	0	0.0157135	0	0	0	0	0	0	0	0	0	0	0	0	0	0
D_0__Bacteria;D_1__Patescibacteria;D_2__Microgenomatia;D_3__Candidatus Daviesbacteria;D_4__uncultured soil bacterium;D_5__uncultured soil bacterium	0	0	0	0	0	0	0	0	0	0	0	0	0	0	0	0	0	0	0	0	0	0	0	0	0	0	0	0	0	0	0	0	0	0	0	0	0	0	0	0.0080248	0	0	0	0	0	0	0	0
D_0__Bacteria;D_1__Patescibacteria;D_2__Microgenomatia;D_3__Candidatus Pacebacteria;D_4__uncultured bacterium;D_5__uncultured bacterium	0	0	0	0	0	0	0	0	0	0	0	0	0	0	0	0	0	0	0	0	0	0	0	0	0	0	0	0	0	0	0	0	0	0	0	0	0	0	0	0	0	0	0	0	0	0	0	0
D_0__Bacteria;D_1__Patescibacteria;D_2__Microgenomatia;D_3__Candidatus Roizmanbacteria;D_4__uncultured bacterium;D_5__uncultured bacterium	0	0	0	0	0	0	0	0	0	0	0	0	0	0.0122156	0	0	0	0	0	0	0	0	0	0	0	0	0	0	0	0	0	0	0	0	0	0	0	0	0	0	0	0	0	0	0	0	0	0
D_0__Bacteria;D_1__Patescibacteria;D_2__Parcubacteria;D_3__Candidatus Campbellbacteria;D_4__metagenome;D_5__metagenome	0	0	0	0	0	0	0	0	0	0	0	0	0	0	0	0	0	0	0	0	0	0	0	0	0	0	0	0	0	0	0	0	0	0	0	0	0	0	0	0	0	0	0	0	0	0	0	0
D_0__Bacteria;D_1__Patescibacteria;D_2__Parcubacteria;D_3__Candidatus Campbellbacteria;D_4__uncultured bacterium;D_5__uncultured bacterium	0	0	0	0	0	0	0	0	0	0	0.0057846	0	0	0	0	0	0	0	0	0.0270879	0	0	0	0	0	0	0	0	0	0	0	0	0	0	0	0	0	0	0	0	0	0	0	0	0	0	0	0
D_0__Bacteria;D_1__Patescibacteria;D_2__Parcubacteria;D_3__Candidatus Kaiserbacteria;Ambiguous_taxa;Ambiguous_taxa	0	0	0	0	0.085081	0.0248615	0	0	0.0438605	0.00629853	0	0	0	0.00698032	0	0	0	0.024033	0	0.00483713	0	0.0231814	0	0	0	0	0	0.0148569	0	0.0225029	0.0521166	0.0120412	0	0	0	0	0.0125021	0	0	0	0	0	0	0.0139934	0	0	0	0.0159802
D_0__Bacteria;D_1__Patescibacteria;D_2__Parcubacteria;D_3__Candidatus Kaiserbacteria;D_4__groundwater metagenome;D_5__groundwater metagenome	0	0	0	0	0	0	0	0	0	0	0	0	0	0	0	0	0	0	0	0	0	0	0	0	0	0	0	0	0	0	0	0	0	0	0	0	0	0	0	0	0	0	0	0	0	0	0	0
D_0__Bacteria;D_1__Patescibacteria;D_2__Parcubacteria;D_3__Candidatus Kaiserbacteria;D_4__metagenome;D_5__metagenome	0	0	0	0	0	0	0	0	0	0	0	0	0	0	0	0	0	0	0	0	0	0	0	0	0	0	0	0	0	0	0	0	0	0	0	0.0224394	0	0	0	0	0	0	0	0	0	0.0168243	0	0
D_0__Bacteria;D_1__Patescibacteria;D_2__Parcubacteria;D_3__Candidatus Kaiserbacteria;D_4__uncultured bacterium;D_5__uncultured bacterium	0	0	0	0	0	0	0	0	0	0	0	0	0	0	0	0	0	0	0	0	0	0	0	0	0	0.0108202	0	0	0	0	0	0	0	0	0	0	0	0	0	0	0	0	0	0.110198	0	0	0	0
D_0__Bacteria;D_1__Patescibacteria;D_2__Parcubacteria;D_3__Candidatus Kaiserbacteria;__;__	0.060668	0	0.0298312	0	0.0595567	0	0.00522023	0	0	0	0.00495823	0	0	0	0	0	0	0	0	0	0.0383373	0	0	0	0	0.00309148	0	0	0.0439625	0	0	0	0	0	0	0	0	0	0	0	0	0	0	0	0	0	0	0
D_0__Bacteria;D_1__Patescibacteria;D_2__Parcubacteria;D_3__Candidatus Moranbacteria;D_4__uncultured bacterium;D_5__uncultured bacterium	0	0	0	0	0	0	0	0	0	0	0	0	0	0	0	0	0	0	0	0	0	0	0	0	0	0	0	0	0	0	0	0	0	0	0	0	0	0	0	0	0	0	0	0	0	0	0	0
D_0__Bacteria;D_1__Patescibacteria;D_2__Parcubacteria;D_3__Candidatus Nomurabacteria;D_4__Candidatus Nomurabacteria bacterium RIFCSPHIGHO2_02_FULL_38_15;D_5__Candidatus Nomurabacteria bacterium RIFCSPHIGHO2_02_FULL_38_15	0	0	0	0	0	0	0	0	0	0	0	0	0	0	0	0	0	0	0	0	0	0	0	0	0	0	0	0	0	0	0	0	0	0	0	0	0	0	0	0	0	0	0	0	0	0	0	0
D_0__Bacteria;D_1__Patescibacteria;D_2__Parcubacteria;D_3__Candidatus Nomurabacteria;D_4__Parcubacteria bacterium RAAC4_OD1_1;D_5__Parcubacteria bacterium RAAC4_OD1_1	0	0	0	0	0	0	0	0	0	0	0	0	0	0	0	0	0	0	0	0	0	0	0	0	0	0	0	0	0	0	0	0	0	0	0	0	0	0	0	0	0	0	0	0	0	0	0	0
D_0__Bacteria;D_1__Patescibacteria;D_2__Parcubacteria;D_3__Candidatus Nomurabacteria;D_4__uncultured Latescibacteria bacterium;D_5__uncultured Latescibacteria bacterium	0	0	0	0	0	0	0	0	0	0	0	0	0	0	0	0	0	0	0	0	0	0	0	0	0	0	0	0	0	0	0	0	0	0	0	0	0	0	0	0	0	0	0	0	0	0	0	0
D_0__Bacteria;D_1__Patescibacteria;D_2__Parcubacteria;D_3__Candidatus Nomurabacteria;D_4__uncultured Parcubacteria group bacterium;D_5__uncultured Parcubacteria group bacterium	0	0	0	0	0	0	0	0	0	0	0	0	0	0	0	0	0	0	0	0	0	0	0	0	0	0	0	0	0	0	0	0	0	0	0	0	0	0	0	0	0	0	0	0	0	0	0	0
D_0__Bacteria;D_1__Patescibacteria;D_2__Parcubacteria;D_3__Candidatus Nomurabacteria;D_4__uncultured bacterium;D_5__uncultured bacterium	0	0	0.00596623	0	0	0.0248615	0	0	0	0	0.00743734	0	0	0	0	0	0	0	0.0104551	0.0406319	0	0.00927257	0	0.0096792	0	0	0	0	0.0244236	0	0	0	0	0	0	0.00611983	0	0	0	0	0.0082697	0	0	0	0	0	0	0
D_0__Bacteria;D_1__Patescibacteria;D_2__Parcubacteria;D_3__Candidatus Nomurabacteria;D_4__wastewater metagenome;D_5__wastewater metagenome	0	0	0	0	0	0	0	0	0	0	0	0	0	0	0	0	0	0	0	0	0	0	0	0	0	0	0	0	0	0	0	0	0	0	0	0	0	0	0	0.0030093	0	0	0	0	0	0	0	0
D_0__Bacteria;D_1__Patescibacteria;D_2__Parcubacteria;D_3__Candidatus Nomurabacteria;__;__	0	0.00283962	0	0	0	0	0	0	0	0.00629853	0	0.00240047	0.0477016	0	0	0	0	0	0.0313652	0	0	0	0	0	0	0	0	0	0.0195389	0	0	0	0.00764877	0	0	0	0	0	0.00626985	0.0080248	0	0	0	0	0	0	0	0
D_0__Bacteria;D_1__Patescibacteria;D_2__Parcubacteria;D_3__Candidatus Staskawiczbacteria;D_4__uncultured bacterium;D_5__uncultured bacterium	0	0	0	0	0	0	0	0	0	0	0	0	0	0	0	0	0	0	0	0	0	0	0	0	0	0	0	0	0	0	0	0	0	0	0	0	0	0	0	0	0	0	0	0	0	0	0	0
D_0__Bacteria;D_1__Patescibacteria;D_2__Parcubacteria;D_3__Candidatus Vogelbacteria;D_4__uncultured bacterium;D_5__uncultured bacterium	0	0	0	0	0	0	0	0	0	0	0	0	0	0	0	0	0	0	0	0	0.0985815	0	0.0246764	0	0	0	0	0	0	0	0	0	0.0178471	0	0	0	0	0	0	0	0	0	0	0	0	0	0	0
D_0__Bacteria;D_1__Patescibacteria;D_2__Parcubacteria;D_3__Candidatus Zambryskibacteria;D_4__Parcubacteria bacterium C7867-006;D_5__Parcubacteria bacterium C7867-006	0.0207548	0	0	0	0	0	0	0	0	0	0.00413186	0	0	0	0	0	0	0	0	0	0	0	0	0.00553097	0	0	0	0	0	0	0.00710682	0	0	0	0.00637938	0	0	0	0	0	0	0	0	0	0	0	0	0
D_0__Bacteria;D_1__Patescibacteria;D_2__Parcubacteria;D_3__Candidatus Zambryskibacteria;D_4__metagenome;D_5__metagenome	0	0	0	0	0	0	0	0	0	0	0	0	0	0	0	0.00589599	0	0	0	0	0	0	0	0	0	0	0	0	0	0	0	0	0	0	0	0	0	0	0	0	0	0	0	0	0	0	0	0
D_0__Bacteria;D_1__Patescibacteria;D_2__Parcubacteria;D_3__Candidatus Zambryskibacteria;__;__	0	0	0.00340927	0.0110068	0	0	0	0	0	0	0	0	0	0	0	0	0	0	0	0	0	0	0	0.00691372	0	0	0	0	0	0	0	0	0	0.00327364	0	0	0	0	0	0	0	0	0	0	0.0112499	0.011777	0	0
D_0__Bacteria;D_1__Patescibacteria;D_2__Parcubacteria;D_3__uncultured bacterium;D_4__uncultured bacterium;D_5__uncultured bacterium	0	0	0	0	0.0085081	0.00710328	0	0	0	0	0	0	0	0	0.00243442	0	0	0	0	0.00483713	0	0.0139089	0	0	0.0110664	0	0	0	0	0	0	0	0.0242211	0	0	0	0	0	0	0.0060186	0	0	0	0	0	0	0	0
D_0__Bacteria;D_1__Patescibacteria;D_2__Parcubacteria;__;__;__	0	0	0	0	0	0	0	0	0	0	0	0.00720141	0	0	0	0.011792	0	0	0	0	0	0	0	0	0	0	0	0.0374653	0	0.0168772	0	0.00802745	0	0	0	0	0	0	0	0	0	0	0	0	0	0	0	0.0130747
D_0__Bacteria;D_1__Patescibacteria;D_2__Saccharimonadia;D_3__Saccharimonadales;Ambiguous_taxa;Ambiguous_taxa	0	0	0	0	0	0	0	0	0	0	0	0	0	0	0	0	0	0	0	0	0	0	0	0	0	0	0	0	0	0	0	0	0	0	0	0	0	0	0.0104498	0	0	0	0	0	0	0	0	0
D_0__Bacteria;D_1__Patescibacteria;D_2__Saccharimonadia;D_3__Saccharimonadales;D_4__Saccharimonadaceae;D_5__Candidatus Saccharimonas	0	0	0	0	0	0.00532746	0	0.0185632	0	0	0.00330548	0	0	0	0.00486885	0	0	0	0	0	0	0	0	0	0	0	0	0	0	0	0	0	0	0	0	0	0	0	0	0	0	0	0	0	0	0	0	0
D_0__Bacteria;D_1__Patescibacteria;D_2__Saccharimonadia;D_3__Saccharimonadales;D_4__Saccharimonadaceae;D_5__uncultured bacterium	0.0159653	0	0	0	0	0	0	0	0	0	0	0	0	0	0	0	0	0	0	0	0	0	0	0	0	0	0	0	0	0	0	0	0	0	0	0	0	0	0	0	0	0	0	0	0	0	0	0
D_0__Bacteria;D_1__Patescibacteria;D_2__Saccharimonadia;D_3__Saccharimonadales;D_4__metagenome;D_5__metagenome	0	0	0.00426159	0	0	0	0	0	0	0	0.00909008	0	0	0	0	0	0	0	0.0304939	0	0	0	0	0	0	0.00927443	0.0210846	0.0187326	0	0	0.17767	0	0	0	0.0733629	0	0	0	0	0	0	0.0174785	0	0	0	0	0	0
D_0__Bacteria;D_1__Patescibacteria;D_2__Saccharimonadia;D_3__Saccharimonadales;D_4__uncultured Candidatus Saccharibacteria bacterium;D_5__uncultured Candidatus Saccharibacteria bacterium	0	0	0	0	0	0	0	0	0	0	0	0	0	0	0	0	0	0	0	0	0	0	0	0	0	0	0	0	0	0	0	0	0	0	0	0	0	0	0	0	0	0	0	0	0	0	0	0
D_0__Bacteria;D_1__Patescibacteria;D_2__Saccharimonadia;D_3__Saccharimonadales;D_4__uncultured bacterium;D_5__uncultured bacterium	0.0159653	0.0132516	0.146599	0	0	0	0	0.0371264	0	0.00629853	0.0388394	0.0396078	0	0.0209409	0.00973769	0.017688	0.0113237	0	0.00784129	0.00773941	0	0	0.0112165	0	0.00276661	0	0	0	0	0	0	0	0.00892356	0	0	0	0	0	0	0	0	0	0	0.031485	0	0	0	0
D_0__Bacteria;D_1__Patescibacteria;D_2__Saccharimonadia;D_3__Saccharimonadales;__;__	0	0	0	0	0	0	0	0	0	0	0	0	0	0	0	0	0	0	0	0	0	0	0	0	0	0	0	0.0503843	0	0	0	0	0	0	0	0	0	0	0	0	0	0	0	0	0	0.00841213	0	0
D_0__Bacteria;D_1__Planctomycetes;D_2__OM190;D_3__uncultured bacterium;D_4__uncultured bacterium;D_5__uncultured bacterium	0	0	0	0	0	0	0	0	0	0	0	0	0	0	0	0	0	0	0	0	0	0	0	0	0	0	0	0	0	0	0	0	0	0	0	0	0	0	0	0	0	0	0	0	0	0.0386958	0	0
D_0__Bacteria;D_1__Planctomycetes;D_2__Phycisphaerae;D_3__Phycisphaerales;D_4__Phycisphaeraceae;D_5__CL500-3	0	0	0	0	0	0	0	0	0	0	0	0	0	0	0	0	0	0	0	0	0	0	0	0.0387168	0	0	0	0	0	0	0	0	0	0	0	0	0	0	0	0	0	0	0	0	0	0	0	0
D_0__Bacteria;D_1__Planctomycetes;D_2__Phycisphaerae;D_3__Phycisphaerales;D_4__Phycisphaeraceae;D_5__JL-ETNP-F27	0	0.0615251	0	0	0.0467946	0	0	0	0	0	0	0	0	0	0	0	0	0	0	0	0	0	0	0	0	0	0	0	0	0	0	0	0	0	0	0	0	0	0	0	0	0	0	0	0	0	0	0
D_0__Bacteria;D_1__Planctomycetes;D_2__Phycisphaerae;D_3__Phycisphaerales;D_4__Phycisphaeraceae;D_5__SM1A02	0	0	0	0	0	0	0	0	0	0.00989769	0	0	0	0	0	0	0	0	0	0	0	0	0	0	0	0	0	0	0	0	0	0	0	0	0	0	0	0	0	0	0	0	0	0	0	0	0	0
D_0__Bacteria;D_1__Planctomycetes;D_2__Phycisphaerae;D_3__Tepidisphaerales;D_4__WD2101 soil group;D_5__uncultured bacterium	0	0	0	0	0	0	0	0	0	0	0	0	0	0	0.00608606	0	0	0	0	0	0	0	0	0	0	0	0	0	0	0	0	0	0	0	0	0	0	0	0	0	0	0	0	0	0	0	0	0
D_0__Bacteria;D_1__Planctomycetes;D_2__Planctomycetacia;D_3__Gemmatales;D_4__Gemmataceae;D_5__Fimbriiglobus	0	0	0	0	0	0	0	0	0	0	0	0	0	0	0	0	0	0	0	0	0	0	0	0	0	0	0	0	0	0	0	0	0	0	0	0	0	0	0	0	0	0	0	0	0	0	0	0
D_0__Bacteria;D_1__Planctomycetes;D_2__Planctomycetacia;D_3__Gemmatales;D_4__Gemmataceae;D_5__Gemmata	0	0	0	0	0	0	0	0	0	0	0.0115692	0	0	0	0	0	0	0	0	0	0	0	0	0	0	0	0	0	0	0	0	0	0	0	0	0	0	0	0	0	0	0	0	0	0	0	0	0
D_0__Bacteria;D_1__Planctomycetes;D_2__Planctomycetacia;D_3__Gemmatales;D_4__Gemmataceae;D_5__Telmatocola	0	0	0	0	0	0	0	0	0	0	0	0	0	0	0	0	0	0	0	0	0	0	0	0	0	0	0	0	0	0	0	0	0	0	0	0	0	0	0	0	0	0	0	0	0	0	0	0
D_0__Bacteria;D_1__Planctomycetes;D_2__Planctomycetacia;D_3__Gemmatales;D_4__Gemmataceae;D_5__Zavarzinella	0	0	0	0	0	0	0	0	0	0	0	0	0	0	0	0	0	0	0	0	0	0	0	0	0	0	0	0	0	0	0	0	0	0	0	0	0	0	0	0	0	0	0	0	0	0	0	0
D_0__Bacteria;D_1__Planctomycetes;D_2__Planctomycetacia;D_3__Isosphaerales;D_4__Isosphaeraceae;D_5__uncultured	0	0	0	0	0	0	0	0	0.00953489	0	0	0	0	0	0	0	0	0	0	0	0	0	0	0	0	0	0	0	0	0	0	0	0	0	0	0	0	0	0	0	0	0	0	0	0	0	0	0
D_0__Bacteria;D_1__Planctomycetes;D_2__Planctomycetacia;D_3__Pirellulales;D_4__Pirellulaceae;D_5__Blastopirellula	0	0	0	0	0	0	0	0	0	0	0	0	0	0	0	0	0	0	0	0	0	0	0	0	0	0	0	0	0	0	0	0	0	0	0	0	0	0	0	0	0	0	0	0.0244884	0	0	0	0
D_0__Bacteria;D_1__Planctomycetes;D_2__Planctomycetacia;D_3__Pirellulales;D_4__Pirellulaceae;D_5__Pirellula	0	0	0	0	0	0	0	0	0	0	0	0	0	0	0	0	0	0	0	0	0	0	0	0	0	0	0	0	0	0	0	0	0	0	0	0	0	0	0	0	0	0	0	0	0	0	0	0
D_0__Bacteria;D_1__Planctomycetes;D_2__Planctomycetacia;D_3__Pirellulales;D_4__Pirellulaceae;D_5__Rhodopirellula	0	0	0.0196033	0	0	0	0	0	0	0.017096	0	0	0	0	0	0.0157227	0	0	0	0	0	0	0	0	0	0	0	0.0219624	0	0	0	0	0	0	0	0	0	0	0	0	0	0	0	0	0	0	0	0
D_0__Bacteria;D_1__Planctomycetes;D_2__Planctomycetacia;D_3__Pirellulales;D_4__Pirellulaceae;D_5__Rubripirellula	0	0.0047327	0.0119325	0	0	0	0	0	0	0	0	0	0	0	0	0	0	0	0	0	0	0	0	0	0	0	0	0	0	0	0	0	0	0	0	0	0	0	0	0	0	0	0	0.0752143	0	0	0	0
D_0__Bacteria;D_1__Planctomycetes;D_2__Planctomycetacia;D_3__Pirellulales;D_4__Pirellulaceae;D_5__uncultured	0	0	0	0	0	0	0	0	0	0	0	0	0	0	0	0	0	0	0	0	0	0	0	0	0	0	0	0	0	0	0	0	0	0	0	0	0	0	0	0.0130403	0	0	0	0	0	0	0	0
D_0__Bacteria;D_1__Planctomycetes;D_2__Planctomycetacia;D_3__Pirellulales;D_4__Pirellulaceae;__	0	0	0	0	0	0	0	0	0	0	0	0	0	0	0	0	0	0	0	0	0	0	0	0	0	0	0	0	0	0	0.0189515	0	0	0	0	0	0	0	0	0	0	0	0	0	0	0	0	0
D_0__Bacteria;D_1__Planctomycetes;D_2__Planctomycetacia;D_3__Planctomycetales;D_4__Rubinisphaeraceae;D_5__Planctomicrobium	0	0	0.0153417	0	0	0	0	0	0	0	0	0	0	0	0	0	0	0	0	0	0.0383373	0	0	0	0	0	0	0	0	0	0	0	0	0	0	0	0	0.00335525	0	0	0	0	0	0	0	0	0	0
D_0__Bacteria;D_1__Planctomycetes;D_2__Planctomycetacia;D_3__Planctomycetales;D_4__Rubinisphaeraceae;D_5__SH-PL14	0	0	0	0	0	0	0	0	0	0	0	0	0	0.0157057	0	0	0	0	0	0	0	0	0	0	0	0	0	0	0	0	0	0	0	0	0	0.0938373	0.0166694	0	0	0	0	0	0	0	0	0	0	0
D_0__Bacteria;D_1__Planctomycetes;D_2__Planctomycetacia;D_3__Planctomycetales;D_4__Rubinisphaeraceae;D_5__uncultured	0	0	0	0	0	0	0	0.00742528	0	0	0	0	0	0	0	0	0	0	0.0200389	0	0	0.0154543	0	0	0	0.00463722	0	0	0	0.135017	0.00947575	0.014048	0	0	0	0	0	0	0	0.0150465	0	0	0	0.0157425	0.0487494	0	0	0
D_0__Bacteria;D_1__Planctomycetes;D_2__Planctomycetacia;D_3__Planctomycetales;D_4__uncultured;D_5__metagenome	0	0	0	0	0	0	0	0	0	0	0	0	0	0	0	0	0	0	0	0	0	0	0	0	0	0	0	0	0	0	0	0	0	0	0	0	0	0	0	0	0	0	0	0	0	0	0	0
D_0__Bacteria;D_1__Planctomycetes;D_2__Planctomycetacia;D_3__Planctomycetales;D_4__uncultured;D_5__uncultured bacterium	0	0	0	0	0	0	0	0	0	0	0	0	0	0	0	0	0	0	0	0	0	0	0	0	0	0	0	0	0	0	0	0	0	0	0	0	0	0	0	0	0	0	0	0	0	0	0	0
D_0__Bacteria;D_1__Planctomycetes;D_2__Planctomycetacia;D_3__Planctomycetales;D_4__uncultured;__	0	0	0	0	0	0	0	0	0	0	0	0	0	0	0	0	0	0	0	0	0	0	0	0	0	0	0	0.00129191	0	0	0	0	0	0	0	0	0	0	0	0	0	0	0	0	0	0	0	0
D_0__Bacteria;D_1__Proteobacteria;D_2__Alphaproteobacteria;D_3__Acetobacterales;D_4__Acetobacteraceae;D_5__Acetobacter	0.373587	0.262191	0.141485	0.366892	0.246735	0.305441	0.159217	0.324856	0.507256	0.274436	0.135525	0.242448	0.0628794	0.359486	0.368815	0.23584	0.387838	0.544748	0.203002	0.472104	0.142396	0.0154543	0	0.00276549	0.0184441	0	0	0	0	0	0.037903	0.226776	0	0	0	0	0	0	0	0	0	0	0	0.0647193	0	0	0	0
D_0__Bacteria;D_1__Proteobacteria;D_2__Alphaproteobacteria;D_3__Acetobacterales;D_4__Acetobacteraceae;D_5__Rhodovarius	0	0	0	0	0	0	0	0	0	0	0	0	0	0	0	0	0	0	0	0	0	0	0	0	0	0	0	0	0	0	0	0	0	0	0	0	0	0	0	0	0	0	0	0	0	0	0	0
D_0__Bacteria;D_1__Proteobacteria;D_2__Alphaproteobacteria;D_3__Acetobacterales;D_4__Acetobacteraceae;D_5__Rhodovastum	0	0	0	0	0.0212703	0	0	0.0538333	0	0	0	0	0	0	0	0	0	0	0	0	0	0	0	0	0	0	0	0	0.0537319	0	0	0	0.0611901	0	0	0	0	0	0	0	0	0.0349571	0	0	0.0224997	0	0	0
D_0__Bacteria;D_1__Proteobacteria;D_2__Alphaproteobacteria;D_3__Acetobacterales;D_4__Acetobacteraceae;D_5__Roseomonas	0	0	0	0	0	0	0	0	0	0	0	0	0	0	0	0	0	0	0	0	0	0	0	0	0	0	0	0	0	0	0	0	0	0	0	0	0	0	0	0	0	0	0	0	0	0	0	0
D_0__Bacteria;D_1__Proteobacteria;D_2__Alphaproteobacteria;D_3__Acetobacterales;D_4__Acetobacteraceae;D_5__uncultured	0	0	0	0.0110068	0	0	0	0.0111379	0.0133488	0	0.00247911	0	0	0	0	0	0	0	0	0	0	0	0	0	0	0	0	0	0	0	0	0	0	0	0	0	0	0	0	0	0	0	0	0	0	0	0	0
D_0__Bacteria;D_1__Proteobacteria;D_2__Alphaproteobacteria;D_3__Acetobacterales;D_4__Acetobacteraceae;__	0	0	0	0	0	0	0	0	0	0	0	0	0	0	0	0	0	0	0	0	0	0	0	0	0	0	0	0	0	0	0	0	0	0	0	0	0	0	0	0	0	0	0	0	0	0	0	0
D_0__Bacteria;D_1__Proteobacteria;D_2__Alphaproteobacteria;D_3__Azospirillales;D_4__Azospirillaceae;D_5__Niveispirillum	0	0	0	0	0	0	0	0	0	0	0	0	0	0	0	0	0	0	0	0	0	0	0	0	0	0	0	0	0	0	0	0	0	0	0	0	0	0	0	0	0	0	0	0	0	0	0	0
D_0__Bacteria;D_1__Proteobacteria;D_2__Alphaproteobacteria;D_3__Caulobacterales;D_4__Caulobacteraceae;D_5__Brevundimonas	0.0526854	0	0	0	0	0.0319648	0	0	0	0	0	0	0	0	0	0	0.0113237	0	0	0	0	0	0	0.00691372	0.0184441	0.0525551	0	0	0	0	0	0	0	0	0	0	0	0	0	0	0	0	0	0	0	0	0	0
D_0__Bacteria;D_1__Proteobacteria;D_2__Alphaproteobacteria;D_3__Caulobacterales;D_4__Caulobacteraceae;D_5__Phenylobacterium	0	0	0	0	0	0	0	0	0	0	0	0	0	0	0	0	0	0	0	0	0	0	0	0	0	0	0	0	0	0	0	0.0361235	0	0	0	0	0	0	0	0	0	0	0	0	0	0	0	0
D_0__Bacteria;D_1__Proteobacteria;D_2__Alphaproteobacteria;D_3__Kordiimonadales;D_4__uncultured;Ambiguous_taxa	0	0	0	0	0	0.0088791	0	0	0	0.0539874	0	0	0	0	0	0	0	0	0	0	0	0	0	0	0	0	0	0	0	0	0	0	0	0	0	0	0	0	0.0146297	0	0.0220525	0	0	0	0	0	0	0
D_0__Bacteria;D_1__Proteobacteria;D_2__Alphaproteobacteria;D_3__Micavibrionales;D_4__uncultured;D_5__uncultured bacterium	0	0	0	0.0146757	0	0	0	0.0111379	0	0	0	0	0	0	0	0	0	0	0	0	0	0	0	0	0	0.00927443	0	0	0	0	0	0	0	0	0	0	0	0	0	0	0	0	0	0	0	0	0	0
D_0__Bacteria;D_1__Proteobacteria;D_2__Alphaproteobacteria;D_3__Paracaedibacterales;D_4__Paracaedibacteraceae;D_5__Candidatus Paracaedibacter	0	0	0.0136371	0	0	0	0	0	0	0	0	0	0	0	0	0	0	0	0.0243951	0	0	0	0	0	0	0	0	0	0	0	0	0	0	0	0	0	0	0	0	0	0	0	0	0	0	0	0	0
D_0__Bacteria;D_1__Proteobacteria;D_2__Alphaproteobacteria;D_3__Paracaedibacterales;D_4__Paracaedibacteraceae;D_5__uncultured	0	0	0	0	0	0	0	0	0	0	0	0	0	0	0	0	0	0	0	0	0	0	0	0	0	0	0	0	0	0	0	0	0	0	0	0	0	0	0	0	0	0	0	0	0	0	0	0.0087165
D_0__Bacteria;D_1__Proteobacteria;D_2__Alphaproteobacteria;D_3__Parvibaculales;D_4__OCS116 clade;Ambiguous_taxa	0	0	0	0	0	0	0	0	0	0	0	0	0	0	0	0	0	0	0	0	0	0	0	0	0	0	0	0	0	0	0	0	0	0	0	0	0	0	0	0	0	0	0	0	0	0	0	0
D_0__Bacteria;D_1__Proteobacteria;D_2__Alphaproteobacteria;D_3__Puniceispirillales;D_4__SAR116 clade;Ambiguous_taxa	0	0	0	0	0	0	0	0	0	0	0	0	0	0	0	0	0	0	0	0	0	0	0	0	0	0	0	0	0	0	0	0	0	0	0	0	0	0	0	0	0	0	0	0	0	0	0	0
D_0__Bacteria;D_1__Proteobacteria;D_2__Alphaproteobacteria;D_3__Puniceispirillales;D_4__SAR116 clade;D_5__uncultured marine bacterium	0	0	0	0	0	0	0	0	0	0	0	0	0	0	0	0	0	0	0	0	0	0.00618171	0	0	0	0	0	0	0	0	0	0	0	0	0	0.0265192	0	0.00838814	0	0	0	0	0	0	0	0	0	0
D_0__Bacteria;D_1__Proteobacteria;D_2__Alphaproteobacteria;D_3__Puniceispirillales;D_4__SAR116 clade;__	0	0	0	0	0	0	0	0	0	0	0	0	0	0	0.00365163	0	0	0	0	0	0	0	0	0	0	0	0	0	0	0	0	0	0	0	0	0	0	0	0	0	0	0	0	0	0	0	0	0
D_0__Bacteria;D_1__Proteobacteria;D_2__Alphaproteobacteria;D_3__Puniceispirillales;D_4__uncultured;Ambiguous_taxa	0.00478958	0	0	0	0	0	0	0	0	0	0	0	0	0	0	0	0	0	0	0	0	0	0	0	0	0	0	0	0	0	0	0	0	0	0	0	0	0	0	0	0	0.0104871	0	0	0	0	0	0
D_0__Bacteria;D_1__Proteobacteria;D_2__Alphaproteobacteria;D_3__Rhizobiales;D_4__A0839;D_5__uncultured bacterium	0	0	0	0	0	0	0	0	0	0	0	0.0216042	0	0	0	0	0	0	0	0	0	0	0	0	0	0	0	0	0	0	0	0	0	0	0	0	0	0	0	0	0	0	0	0	0	0	0	0
D_0__Bacteria;D_1__Proteobacteria;D_2__Alphaproteobacteria;D_3__Rhizobiales;D_4__A0839;__	0	0	0	0	0	0	0	0	0	0	0	0	0	0	0	0	0	0	0	0	0	0	0	0	0	0	0	0	0	0	0	0	0	0	0	0	0	0	0	0	0	0	0	0	0	0	0	0
D_0__Bacteria;D_1__Proteobacteria;D_2__Alphaproteobacteria;D_3__Rhizobiales;D_4__Beijerinckiaceae;D_5__1174-901-12	0	0	0	0	0	0	0	0	0	0	0	0	0	0.0209409	0	0	0	0	0	0	0	0	0	0	0	0	0	0	0	0	0	0	0	0	0	0	0	0	0	0	0	0	0	0	0	0	0	0
D_0__Bacteria;D_1__Proteobacteria;D_2__Alphaproteobacteria;D_3__Rhizobiales;D_4__Beijerinckiaceae;D_5__Bosea	0.0973881	0	0	0	0	0	0	0	0	0	0	0	0	0	0	0	0	0	0	0	0	0	0	0	0	0	0	0	0	0	0	0	0	0	0	0	0	0	0	0	0	0	0	0	0	0	0	0
D_0__Bacteria;D_1__Proteobacteria;D_2__Alphaproteobacteria;D_3__Rhizobiales;D_4__Beijerinckiaceae;D_5__Chelatococcus	0	0	0	0	0	0	0	0	0	0	0	0	0	0	0	0	0	0	0	0	0	0	0	0	0	0	0	0	0	0	0	0	0	0	0	0	0	0	0	0	0	0	0	0	0	0	0	0
D_0__Bacteria;D_1__Proteobacteria;D_2__Alphaproteobacteria;D_3__Rhizobiales;D_4__Beijerinckiaceae;D_5__Methylobacterium	0	0	0	0	0.0170162	0.0142066	0	0.0297011	0	0.00809811	0.00247911	0.020404	0	0	0	0	0.0042464	0	0	0.0261205	0	0.0339994	0	0.0165929	0.0175219	0	0	0	0	0	0.130292	0	0.0407934	0	0	0	0	0	0	0	0	0	0.00295406	0.0279867	0	0	0	0
D_0__Bacteria;D_1__Proteobacteria;D_2__Alphaproteobacteria;D_3__Rhizobiales;D_4__Beijerinckiaceae;D_5__Methylorosula	0	0	0	0	0	0	0	0	0	0	0	0	0	0	0	0	0	0	0	0	0	0	0	0	0	0	0	0	0	0	0	0	0	0	0	0	0	0	0	0	0	0	0	0	0	0	0	0
D_0__Bacteria;D_1__Proteobacteria;D_2__Alphaproteobacteria;D_3__Rhizobiales;D_4__Beijerinckiaceae;D_5__alphaI cluster	0	0	0	0	0	0	0	0	0	0	0	0	0	0	0	0	0	0	0	0	0	0	0	0	0	0	0	0	0	0	0	0	0	0	0	0	0	0	0	0	0	0	0	0	0	0	0	0
D_0__Bacteria;D_1__Proteobacteria;D_2__Alphaproteobacteria;D_3__Rhizobiales;D_4__Beijerinckiaceae;__	0	0	0	0	0	0	0	0	0	0	0	0	0	0	0	0	0	0	0	0	0	0	0	0	0	0	0	0	0	0	0	0	0	0	0	0	0	0	0	0	0	0	0	0	0	0	0	0
D_0__Bacteria;D_1__Proteobacteria;D_2__Alphaproteobacteria;D_3__Rhizobiales;D_4__Devosiaceae;D_5__Devosia	0	0	0.0264219	0	0	0	0	0	0	0	0	0	0	0	0	0	0	0	0	0	0	0	0	0	0	0	0	0	0	0	0	0	0	0	0	0	0	0	0	0	0	0	0	0	0	0	0	0
D_0__Bacteria;D_1__Proteobacteria;D_2__Alphaproteobacteria;D_3__Rhizobiales;D_4__Hyphomicrobiaceae;D_5__Hyphomicrobium	0	0.0113585	0	0	0	0	0	0	0	0	0	0	0	0	0	0	0	0	0	0	0	0	0	0	0	0	0	0	0	0	0	0	0	0	0	0	0	0	0	0	0	0	0	0	0	0	0	0
D_0__Bacteria;D_1__Proteobacteria;D_2__Alphaproteobacteria;D_3__Rhizobiales;D_4__Hyphomicrobiaceae;__	0	0	0	0	0	0	0	0	0	0	0	0	0	0	0	0	0	0	0	0	0	0	0	0	0	0	0	0	0	0	0	0	0	0	0	0	0	0	0	0	0	0	0	0	0	0	0	0
D_0__Bacteria;D_1__Proteobacteria;D_2__Alphaproteobacteria;D_3__Rhizobiales;D_4__Rhizobiaceae;D_5__Allorhizobium-Neorhizobium-Pararhizobium-Rhizobium	0.0175618	0	0	0	0.0127622	0	0	0	0.0381396	0	0.0347076	0.0648127	0	0.0157057	0.0121721	0	0	0	0	0.0435342	0	0.0618171	0.0134599	0.0566925	0.0912981	0.0664668	0	0	0.0293083	0.03938	0	0.0782677	0	0	0	0	0	0	0	0	0	0	0	0.00699668	0	0	0.00818406	0
D_0__Bacteria;D_1__Proteobacteria;D_2__Alphaproteobacteria;D_3__Rhizobiales;D_4__Rhizobiaceae;D_5__Aminobacter	0	0	0	0	0	0	0	0	0	0	0	0	0	0	0	0	0	0	0	0	0	0	0	0	0	0	0	0	0	0	0	0	0	0	0	0	0	0	0	0	0	0	0	0	0	0	0	0
D_0__Bacteria;D_1__Proteobacteria;D_2__Alphaproteobacteria;D_3__Rhizobiales;D_4__Rhizobiaceae;D_5__Mesorhizobium	0	0	0	0	0	0	0	0.0204195	0	0	0	0	0	0	0	0	0	0	0	0	0	0	0	0	0	0	0	0	0	0	0	0	0	0	0	0	0	0	0	0	0	0	0	0	0	0	0	0
D_0__Bacteria;D_1__Proteobacteria;D_2__Alphaproteobacteria;D_3__Rhizobiales;D_4__Rhizobiaceae;D_5__Ochrobactrum	0	0	0	0	0	0	0	0	0	0.0152964	0	0.00360071	0	0	0.0121721	0	0.0353867	0	0	0	0	0	0	0	0	0	0	0	0	0	0	0	0	0	0	0	0	0	0	0	0	0	0	0	0	0	0	0
D_0__Bacteria;D_1__Proteobacteria;D_2__Alphaproteobacteria;D_3__Rhizobiales;D_4__Rhizobiaceae;D_5__Paenochrobactrum	0	0	0	0	0	0	0	0	0	0	0	0	0	0	0	0	0	0	0	0	0	0	0	0	0	0	0	0	0	0	0	0	0	0	0	0	0	0	0	0	0	0	0	0	0	0	0	0
D_0__Bacteria;D_1__Proteobacteria;D_2__Alphaproteobacteria;D_3__Rhizobiales;D_4__Rhizobiaceae;D_5__Pseudahrensia	0	0	0	0	0	0	0	0	0	0	0	0	0	0	0	0	0	0	0	0	0	0	0	0	0	0	0.0072985	0.0852658	0	0	0	0	0	0	0	0	0	0	0	0	0	0	0	0	0	0	0	0
D_0__Bacteria;D_1__Proteobacteria;D_2__Alphaproteobacteria;D_3__Rhizobiales;D_4__Rhizobiaceae;D_5__uncultured	0	0	0	0	0	0	0.0091354	0	0	0	0	0	0	0	0	0	0	0	0	0	0	0	0	0	0	0.0154574	0	0	0	0	0	0	0	0	0	0	0	0	0	0	0	0	0	0	0	0	0	0
D_0__Bacteria;D_1__Proteobacteria;D_2__Alphaproteobacteria;D_3__Rhizobiales;D_4__Rhizobiaceae;__	0	0	0	0	0	0	0	0	0	0	0	0	0	0	0	0	0	0	0	0	0	0	0	0	0	0.0340062	0	0	0	0	0	0	0	0	0	0	0	0	0	0	0	0	0	0	0	0	0	0
D_0__Bacteria;D_1__Proteobacteria;D_2__Alphaproteobacteria;D_3__Rhizobiales;D_4__Rhizobiales Incertae Sedis;D_5__uncultured	0	0	0	0	0	0	0.00391517	0	0	0	0.0140483	0	0	0	0	0	0	0	0	0	0	0	0	0	0	0	0	0	0	0	0	0	0	0	0	0	0	0	0	0	0	0	0	0	0	0	0	0
D_0__Bacteria;D_1__Proteobacteria;D_2__Alphaproteobacteria;D_3__Rhizobiales;D_4__Stappiaceae;D_5__Pannonibacter	0	0	0	0	0	0	0	0	0	0	0	0	0	0	0	0	0.0268939	0	0	0	0	0	0	0	0	0	0	0	0	0	0	0	0	0	0	0	0	0	0	0	0	0	0	0	0.0112499	0	0	0
D_0__Bacteria;D_1__Proteobacteria;D_2__Alphaproteobacteria;D_3__Rhizobiales;D_4__Xanthobacteraceae;D_5__Bradyrhizobium	0	0	0	0	0	0	0.0195759	0	0	0	0	0	0	0	0	0	0	0	0	0	0	0	0	0	0	0	0	0	0	0	0	0	0	0	0	0	0	0	0	0	0	0	0	0	0	0	0	0
D_0__Bacteria;D_1__Proteobacteria;D_2__Alphaproteobacteria;D_3__Rhizobiales;D_4__Xanthobacteraceae;__	0	0	0	0	0	0	0	0	0	0	0	0	0	0	0	0	0	0	0	0	0	0	0	0	0	0.0618295	0	0	0	0	0	0	0	0	0	0	0	0	0	0	0	0	0	0	0	0	0	0
D_0__Bacteria;D_1__Proteobacteria;D_2__Alphaproteobacteria;D_3__Rhizobiales;__;__	0	0	0	0	0	0	0	0	0	0	0	0	0	0	0	0	0	0	0	0	0	0	0	0	0	0	0	0	0	0	0	0	0	0	0	0	0	0	0	0	0	0	0	0	0	0	0	0
D_0__Bacteria;D_1__Proteobacteria;D_2__Alphaproteobacteria;D_3__Rhodobacterales;D_4__Rhodobacteraceae;D_5__Ascidiaceihabitans	0	0	0	0	0	0	0	0	0	0	0	0	0	0	0	0	0	0	0	0	0	0	0	0	0	0	0	0	0	0	0	0	0	0	0	0	0	0	0	0	0	0	0	0	0	0	0	0
D_0__Bacteria;D_1__Proteobacteria;D_2__Alphaproteobacteria;D_3__Rhodobacterales;D_4__Rhodobacteraceae;D_5__Cereibacter	0	0	0	0	0	0	0	0	0	0	0	0	0	0.0104705	0	0	0	0	0	0	0	0	0	0	0	0	0	0	0	0	0	0	0	0	0	0	0	0	0	0	0	0	0	0	0	0	0	0
D_0__Bacteria;D_1__Proteobacteria;D_2__Alphaproteobacteria;D_3__Rhodobacterales;D_4__Rhodobacteraceae;D_5__Defluviimonas	0	0	0	0	0	0	0	0	0	0	0	0	0	0	0	0	0	0	0	0	0	0	0	0	0	0	0	0	0	0	0	0	0	0	0	0	0	0	0	0	0	0	0	0	0	0	0	0
D_0__Bacteria;D_1__Proteobacteria;D_2__Alphaproteobacteria;D_3__Rhodobacterales;D_4__Rhodobacteraceae;D_5__Falsirhodobacter	0	0	0	0	0	0	0	0	0	0	0	0	0	0	0	0	0	0	0	0	0	0	0	0	0	0	0	0	0.0830403	0	0	0.00802745	0	0	0	0	0	0	0	0	0	0	0	0	0	0	0	0
D_0__Bacteria;D_1__Proteobacteria;D_2__Alphaproteobacteria;D_3__Rhodobacterales;D_4__Rhodobacteraceae;D_5__Lentibacter	0	0.0104119	0	0.00733783	0.0255243	0	0	0	0.00762791	0	0	0	0	0	0	0	0	0.144198	0.0104551	0.0280554	0	0.0571808	0.0852458	0.0954093	0.0110664	0.0108202	0	0	0	0	0	0.0923157	0.0203967	0.0111304	0	0.128516	0	0	0	0	0	0	0	0.0139934	0	0	0.00409203	0.0610155
D_0__Bacteria;D_1__Proteobacteria;D_2__Alphaproteobacteria;D_3__Rhodobacterales;D_4__Rhodobacteraceae;D_5__Loktanella	0	0	0	0	0	0	0	0	0	0	0	0	0	0	0	0	0	0	0	0	0	0	0	0	0	0	0.0656865	0.0665332	0	0	0	0	0	0	0	0	0	0	0	0	0	0	0	0	0	0	0	0
D_0__Bacteria;D_1__Proteobacteria;D_2__Alphaproteobacteria;D_3__Rhodobacterales;D_4__Rhodobacteraceae;D_5__Paracoccus	0	0	0	0	0	0	0	0	0	0	0	0	0	0	0	0	0.09059	0.0974672	0.0461765	0	0.0273838	0	0.0134599	0	0.0175219	0.505456	0	0	0.0683861	0.0900115	0.523535	0.17259	0	0	0	0	0	0	0	0	0	0	0	0	0	0	0	0
D_0__Bacteria;D_1__Proteobacteria;D_2__Alphaproteobacteria;D_3__Rhodobacterales;D_4__Rhodobacteraceae;D_5__Planktomarina	0	0	0	0	0	0	0	0	0	0	0	0	0	0	0	0	0	0	0	0	0	0	0	0.0096792	0	0	0	0	0	0	0	0	0	0	0	0.0224394	0	0.0117434	0.0229895	0	0	0	0	0	0	0	0	0.0305077
D_0__Bacteria;D_1__Proteobacteria;D_2__Alphaproteobacteria;D_3__Rhodobacterales;D_4__Rhodobacteraceae;D_5__Pseudorhodobacter	0	0	0	0	0	0.0355164	0	0	0	0	0	0	0	0	0	0	0	0	0	0	0	0	0	0	0	0	0	0	0	0	0	0	0	0	0	0	0	0	0	0	0	0	0	0.0367326	0	0	0	0
D_0__Bacteria;D_1__Proteobacteria;D_2__Alphaproteobacteria;D_3__Rhodobacterales;D_4__Rhodobacteraceae;D_5__Rhodobacter	0	0	0	0	0.0170162	0	0.0104405	0	0	0	0	0	0.00867303	0	0	0	0	0	0.0235239	0	0	0	0	0	0	0	0	0	0	0	0.0923886	0	0	0	0	0.0224394	0	0	0	0	0	0	0	0	0	0	0	0
D_0__Bacteria;D_1__Proteobacteria;D_2__Alphaproteobacteria;D_3__Rhodobacterales;D_4__Rhodobacteraceae;D_5__Sulfitobacter	0	0	0	0	0	0	0	0	0	0	0	0	0	0	0	0	0.024063	0.0253682	0	0	0	0	0.0695426	0.0456305	0	0	0	0	0	0.00562572	0.120816	0	0	0	0	0	0	0	0	0	0	0	0	0	0	0	0	0
D_0__Bacteria;D_1__Proteobacteria;D_2__Alphaproteobacteria;D_3__Rhodobacterales;D_4__Rhodobacteraceae;D_5__Tabrizicola	0	0	0.0161941	0	0	0	0	0	0	0	0	0	0	0	0	0	0	0	0	0	0	0	0	0	0	0	0	0	0	0	0	0	0.0127479	0	0	0	0	0	0	0	0	0	0	0	0	0	0	0
D_0__Bacteria;D_1__Proteobacteria;D_2__Alphaproteobacteria;D_3__Rhodobacterales;D_4__Rhodobacteraceae;D_5__Tateyamaria	0	0.0340754	0	0	0	0	0	0	0	0	0	0	0	0	0	0	0	0	0	0	0	0.00772714	0	0	0	0	0	0	0	0	0	0	0.295752	0	0.124398	0.289672	0.0875146	0.0100658	0.108677	0	0.0468616	0.0192264	0	0.244884	0.112499	0.141324	0.0265982	0.126389
D_0__Bacteria;D_1__Proteobacteria;D_2__Alphaproteobacteria;D_3__Rhodobacterales;D_4__Rhodobacteraceae;__	0	0	0	0	0	0.0266373	0.00391517	0	0	0.0125971	0	0	0	0.0104705	0.00608606	0.00982666	0	0	0	0	0	0	0	0	0	0	0	0	0	0	0	0	0	0	0	0	0	0	0.0188096	0	0	0	0	0.0157425	0	0.0370134	0	0.0159802
D_0__Bacteria;D_1__Proteobacteria;D_2__Alphaproteobacteria;D_3__Rhodospirillales;D_4__Magnetospiraceae;D_5__Magnetospira	0	0	0	0	0	0	0	0	0	0	0	0	0	0	0	0	0	0	0	0	0	0	0	0	0	0	0	0	0	0	0	0	0	0	0	0	0	0	0	0	0	0	0	0	0	0	0	0
D_0__Bacteria;D_1__Proteobacteria;D_2__Alphaproteobacteria;D_3__Rhodospirillales;D_4__Magnetospiraceae;D_5__uncultured	0	0	0	0	0	0.0230857	0	0	0	0.0413904	0	0	0	0	0	0	0	0	0	0	0	0	0	0	0	0	0	0	0	0	0	0	0	0	0	0	0	0	0	0	0	0	0	0	0	0	0	0
D_0__Bacteria;D_1__Proteobacteria;D_2__Alphaproteobacteria;D_3__Rhodospirillales;D_4__Magnetospirillaceae;D_5__Magnetospirillum	0	0	0	0	0	0	0	0	0	0	0	0	0	0	0	0	0	0	0	0	0	0	0	0.00691372	0	0	0	0	0	0	0	0	0	0	0	0	0	0	0	0	0	0	0	0	0	0	0	0
D_0__Bacteria;D_1__Proteobacteria;D_2__Alphaproteobacteria;D_3__Rhodospirillales;D_4__Rhodospirillaceae;D_5__uncultured	0	0	0	0	0	0	0	0	0	0	0	0	0	0	0	0	0	0	0	0	0	0	0	0	0	0	0	0	0	0	0	0	0	0	0	0	0	0	0	0	0	0	0	0	0	0	0	0
D_0__Bacteria;D_1__Proteobacteria;D_2__Alphaproteobacteria;D_3__Rhodospirillales;D_4__uncultured;D_5__metagenome	0	0	0	0	0	0	0	0	0	0	0	0	0	0	0	0	0	0	0	0	0	0	0	0	0	0	0	0	0	0	0	0	0	0	0	0	0	0	0	0	0	0	0	0.0139934	0	0	0	0
D_0__Bacteria;D_1__Proteobacteria;D_2__Alphaproteobacteria;D_3__Rickettsiales;D_4__Rickettsiaceae;D_5__Candidatus Megaira	0	0	0	0	0	0	0	0	0	0	0	0	0	0	0	0	0	0	0	0	0	0	0	0	0	0	0	0	0	0	0	0	0	0	0	0	0	0	0	0	0	0	0	0	0	0	0	0
D_0__Bacteria;D_1__Proteobacteria;D_2__Alphaproteobacteria;D_3__Rickettsiales;D_4__Rickettsiaceae;D_5__uncultured	0	0	0	0	0	0	0.0143556	0.00371264	0	0	0	0.00840165	0	0	0	0	0.00849281	0	0	0	0	0	0	0.00414823	0	0	0	0	0	0	0	0	0	0	0	0	0	0	0	0	0	0	0	0.0542242	0	0	0	0
D_0__Bacteria;D_1__Proteobacteria;D_2__Alphaproteobacteria;D_3__SAR11 clade;Ambiguous_taxa;Ambiguous_taxa	0	0	0	0	0	0	0	0	0.0152558	0	0.0842899	0	0	0.0628228	0	0	0	0	0	0.0174137	0	0	0	0	0	0	0	0	0	0	0	0	0	0	0	0.0469187	0	0	0	0	0	0	0	0	0	0	0	0.0159802
D_0__Bacteria;D_1__Proteobacteria;D_2__Alphaproteobacteria;D_3__SAR11 clade;D_4__Clade I;D_5__Clade Ia	0.162846	0.283015	0	0.0843851	0.0553027	0.207771	0.0835237	0.0798218	0.282233	0.34462	0.267744	0	0.0498699	0.10296	0.0450368	0.112024	0	0	0.00435627	0.00193485	0.0383373	0.00772714	0.118895	0.134126	0	0.185489	0.0275721	0	0.0390778	0	0	0.0200686	0.146601	0.0582709	0.143536	2.12358	0.258376	0.184539	0.208995	0.198614	0.210877	0.16255	0	0.456533	0.0862489	0.0925334	0.0398973	0.801918
D_0__Bacteria;D_1__Proteobacteria;D_2__Alphaproteobacteria;D_3__SAR11 clade;D_4__Clade II;Ambiguous_taxa	0.0239479	0	0	0.0366892	0	0	0	0	0.0324186	0.0278935	0	0	0	0.0785285	0.00730327	0	0	0	0	0	0	0	0	0	0	0	0	0	0	0	0	0	0	0	0	0	0	0.00671051	0	0	0	0.0174785	0	0	0	0	0	0.0566572
D_0__Bacteria;D_1__Proteobacteria;D_2__Alphaproteobacteria;D_3__SAR11 clade;D_4__Clade II;D_5__unidentified marine bacterioplankton	0	0	0	0	0	0	0.0287113	0	0	0	0	0	0	0	0	0	0	0	0	0	0	0	0	0	0	0	0	0	0	0	0	0	0	0	0	0	0	0	0	0	0	0	0	0	0	0	0	0
D_0__Bacteria;D_1__Proteobacteria;D_2__Alphaproteobacteria;D_3__SAR11 clade;D_4__Clade II;__	0.063861	0	0	0.0256824	0	0.18291	0	0.0241322	0.0419535	0.138568	0.0314021	0.0108021	0.0260191	0	0.0146065	0	0	0.0453957	0	0.00870684	0	0	0	0	0	0	0	0	0	0	0.00947575	0	0	0.0281533	0.213709	0.0999572	0.0750125	0	0.0543387	0	0	0.0506878	0	0.0839601	0.0112499	0.0538376	0.0132991	0.171424
D_0__Bacteria;D_1__Proteobacteria;D_2__Alphaproteobacteria;D_3__SAR11 clade;D_4__Clade III;D_5__uncultured bacterium	0	0	0.00255696	0	0	0	0	0	0	0	0	0	0	0	0.0279959	0	0	0	0	0	0	0	0	0	0	0	0	0	0	0	0	0	0	0	0	0	0	0	0	0	0	0	0	0	0	0	0	0
D_0__Bacteria;D_1__Proteobacteria;D_2__Alphaproteobacteria;D_3__SAR11 clade;D_4__Clade III;D_5__uncultured marine bacterium	0	0	0	0	0	0	0	0	0	0	0	0.0168033	0	0	0	0	0	0	0	0	0	0	0	0	0	0	0	0	0	0	0	0	0	0	0	0.104037	0	0.00503288	0	0	0.0124046	0	0	0.00349834	0.0112499	0	0	0.0319605
D_0__Bacteria;D_1__Proteobacteria;D_2__Alphaproteobacteria;D_3__SAR11 clade;D_4__Clade IV;Ambiguous_taxa	0	0	0	0	0	0	0	0	0	0	0	0	0	0	0	0	0	0	0	0	0	0	0	0	0	0	0	0	0	0	0	0	0	0	0	0.0285592	0	0	0	0	0	0	0	0	0	0	0	0
D_0__Bacteria;D_1__Proteobacteria;D_2__Alphaproteobacteria;D_3__Sphingomonadales;D_4__Sphingomonadaceae;D_5__Altererythrobacter	0	0	0	0	0	0	0	0	0	0	0	0	0	0	0	0	0	0	0	0	0	0	0	0	0	0	0	0	0	0	0	0	0	0	0	0	0	0	0	0	0	0	0	0	0	0	0	0.11622
D_0__Bacteria;D_1__Proteobacteria;D_2__Alphaproteobacteria;D_3__Sphingomonadales;D_4__Sphingomonadaceae;D_5__Novosphingobium	0	0	0	0	0	0	0	0	0	0.0359916	0.0429713	0	0	0	0	0	0	0	0	0.0164463	0	0	0	0	0	0	0	0	0	0	0.0213204	0	0	0	0	0	0	0	0	0	0	0	0	0	0	0	0	0
D_0__Bacteria;D_1__Proteobacteria;D_2__Alphaproteobacteria;D_3__Sphingomonadales;D_4__Sphingomonadaceae;D_5__Sphingobium	0	0	0	0	0	0	0	0	0	0	0	0	0	0	0	0	0	0	0	0	0	0	0	0	0	0	0	0	0	0	0	0	0	0	0	0	0	0	0	0	0	0	0	0	0	0.0286012	0	0
D_0__Bacteria;D_1__Proteobacteria;D_2__Alphaproteobacteria;D_3__Sphingomonadales;D_4__Sphingomonadaceae;D_5__Sphingomonas	0.122932	0.0179842	0.0886411	0.212797	0.102097	0.0568263	0.242741	0.0297011	0.14493	0.0422901	0.0652833	0.231645	0.0390286	0.0540974	0.155803	0.123816	0.0778508	0.102808	0.0609878	0.0870684	0.0547675	0.326085	0.361173	0.3526	0.0562544	0.525551	0	0.0813901	0.244236	0.931057	0.42404	0.0461579	0.0293203	0.0163682	0	0.0387589	0	0.0301973	0.0104498	0	0.0234308	0	0.00369257	0.0752143	0.101249	0.0319661	0.0102301	0
D_0__Bacteria;D_1__Proteobacteria;D_2__Alphaproteobacteria;D_3__Sphingomonadales;D_4__Sphingomonadaceae;D_5__Sphingopyxis	0	0	0	0	0	0	0	0	0	0	0	0	0	0	0	0	0	0.0440605	0	0	0	0	0	0	0	0	0	0	0	0	0	0	0.0216715	0	0	0	0	0	0	0	0	0	0	0	0	0	0	0
D_0__Bacteria;D_1__Proteobacteria;D_2__Alphaproteobacteria;D_3__Sphingomonadales;D_4__Sphingomonadaceae;D_5__Sphingorhabdus	0	0	0	0	0	0.0230857	0	0	0	0	0	0	0	0.00872539	0	0	0	0.113489	0	0	0	0	0	0	0.0267439	0.0216403	0	0	0	0	0	0	0	0	0.0446557	0	0	0	0	0.0060186	0	0	0	0	0	0	0	0
D_0__Bacteria;D_1__Proteobacteria;D_2__Alphaproteobacteria;D_3__Sphingomonadales;D_4__Sphingomonadaceae;D_5__uncultured	0	0	0	0	0	0	0	0	0	0	0	0	0	0	0	0	0	0	0	0	0	0	0	0	0	0	0	0	0	0.154707	0	0	0	0	0	0	0	0	0	0	0	0	0	0	0	0	0	0
D_0__Bacteria;D_1__Proteobacteria;D_2__Alphaproteobacteria;D_3__Sphingomonadales;D_4__Sphingomonadaceae;__	0	0	0	0	0	0	0	0	0	0	0	0	0	0	0	0	0	0	0	0	0	0	0	0	0	0	0	0	0	0	0	0	0	0	0	0	0	0	0	0	0	0	0	0	0	0	0	0
D_0__Bacteria;D_1__Proteobacteria;D_2__Alphaproteobacteria;D_3__Thalassobaculales;D_4__Nisaeaceae;D_5__OM75 clade	0	0	0	0	0	0	0	0	0	0	0	0	0	0	0	0	0	0	0	0	0	0	0	0	0	0	0	0	0	0	0	0	0	0	0	0	0	0	0	0	0	0.0209743	0	0	0	0	0	0
D_0__Bacteria;D_1__Proteobacteria;D_2__Alphaproteobacteria;__;__;__	0.0255444	0	0	0	0	0	0	0	0	0	0	0	0	0	0.0158237	0	0	0	0.00697004	0	0	0	0	0	0	0	0	0	0	0	0	0	0	0	0.0446557	0	0	0	0	0	0	0	0	0	0	0	0	0
D_0__Bacteria;D_1__Proteobacteria;D_2__Deltaproteobacteria;D_3__Bdellovibrionales;D_4__Bacteriovoracaceae;D_5__Bacteriovorax	0	0	0	0	0	0	0	0	0	0	0	0	0	0	0	0	0	0	0	0	0	0	0	0	0	0	0	0	0	0	0	0	0	0	0	0	0	0	0	0	0	0	0	0	0	0	0	0
D_0__Bacteria;D_1__Proteobacteria;D_2__Deltaproteobacteria;D_3__Bdellovibrionales;D_4__Bacteriovoracaceae;D_5__Peredibacter	0	0	0	0	0	0	0	0	0	0	0	0	0	0	0	0	0	0	0	0	0	0	0	0	0	0	0	0	0	0	0	0	0	0	0	0	0	0	0	0	0	0	0	0	0	0	0	0
D_0__Bacteria;D_1__Proteobacteria;D_2__Deltaproteobacteria;D_3__Bdellovibrionales;D_4__Bdellovibrionaceae;D_5__Bdellovibrio	0	0	0	0	0	0	0	0	0	0	0	0	0	0	0	0.00589599	0	0	0	0	0	0	0	0	0	0	0	0	0	0.0140643	0	0	0	0	0	0	0	0	0	0	0	0	0	0	0	0	0	0
D_0__Bacteria;D_1__Proteobacteria;D_2__Deltaproteobacteria;D_3__Bdellovibrionales;D_4__Bdellovibrionaceae;D_5__OM27 clade	0	0	0	0	0	0	0	0	0	0	0	0	0	0	0	0	0	0	0	0	0	0	0	0	0	0	0	0	0	0	0	0	0	0	0	0	0	0	0.0668784	0	0.0124046	0	0	0	0	0	0	0
D_0__Bacteria;D_1__Proteobacteria;D_2__Deltaproteobacteria;D_3__Desulfobacterales;D_4__Desulfobulbaceae;D_5__uncultured	0	0	0	0	0	0	0	0	0	0	0	0	0	0	0	0	0	0	0	0	0	0	0	0	0	0	0	0	0	0	0	0	0	0	0	0	0	0	0	0	0	0	0	0	0	0	0	0
D_0__Bacteria;D_1__Proteobacteria;D_2__Deltaproteobacteria;D_3__Desulfuromonadales;D_4__Desulfuromonadaceae;D_5__Pelobacter	0	0	0	0	0	0	0	0	0	0	0	0	0	0	0	0	0	0	0	0	0	0	0	0	0	0	0	0	0	0	0	0	0	0	0	0	0	0	0	0	0	0	0	0.0804618	0	0	0	0
D_0__Bacteria;D_1__Proteobacteria;D_2__Deltaproteobacteria;D_3__MBNT15;D_4__uncultured Anaeromyxobacter sp.;D_5__uncultured Anaeromyxobacter sp.	0	0	0	0	0	0	0	0	0	0	0	0	0	0	0	0	0	0	0	0	0	0	0	0	0	0	0	0	0	0	0	0	0	0	0	0	0	0	0	0	0	0	0	0	0	0	0	0
D_0__Bacteria;D_1__Proteobacteria;D_2__Deltaproteobacteria;D_3__Myxococcales;D_4__Nannocystaceae;D_5__Nannocystis	0	0	0	0	0	0	0	0	0	0	0	0	0	0	0	0	0	0	0	0	0	0.0169997	0	0	0	0	0	0	0	0	0	0	0	0	0	0	0	0	0	0	0	0	0	0	0	0	0	0.00726375
D_0__Bacteria;D_1__Proteobacteria;D_2__Deltaproteobacteria;D_3__Myxococcales;D_4__P3OB-42;D_5__uncultured bacterium	0	0	0	0	0	0	0	0	0	0	0	0	0	0	0	0	0	0	0	0	0	0	0	0	0	0	0	0	0	0	0	0	0	0	0	0	0	0	0	0	0	0	0	0	0	0	0	0
D_0__Bacteria;D_1__Proteobacteria;D_2__Deltaproteobacteria;D_3__Myxococcales;D_4__Polyangiaceae;D_5__Pajaroellobacter	0	0	0	0	0	0	0	0	0	0	0	0	0	0	0	0	0	0	0	0	0	0	0	0	0.0175219	0	0	0	0	0.0309415	0	0	0.00892356	0	0	0	0	0	0	0	0	0	0	0	0	0	0	0
D_0__Bacteria;D_1__Proteobacteria;D_2__Deltaproteobacteria;D_3__Oligoflexales;D_4__0319-6G20;D_5__uncultured Bacteriovorax sp.	0	0	0	0	0	0	0	0	0	0	0	0	0	0	0	0	0	0	0	0	0	0	0	0	0	0	0	0	0	0	0	0	0	0	0	0	0	0	0	0	0	0	0	0	0	0	0	0
D_0__Bacteria;D_1__Proteobacteria;D_2__Deltaproteobacteria;D_3__Oligoflexales;D_4__0319-6G20;D_5__uncultured bacterium	0	0	0	0	0	0	0	0	0	0	0	0	0	0	0	0	0	0	0	0	0	0	0	0	0	0	0	0	0	0	0	0	0	0	0	0	0	0	0	0	0	0	0	0	0	0	0	0
D_0__Bacteria;D_1__Proteobacteria;D_2__Deltaproteobacteria;D_3__Oligoflexales;D_4__0319-6G20;__	0	0	0	0	0	0	0	0	0	0	0	0	0	0	0	0	0	0	0	0	0	0	0	0	0	0	0	0	0	0	0	0	0	0	0	0	0	0	0	0.0110341	0.0110263	0	0	0	0	0	0	0
D_0__Bacteria;D_1__Proteobacteria;D_2__Deltaproteobacteria;D_3__Oligoflexales;D_4__Oligoflexaceae;D_5__Oligoflexus	0	0	0	0	0	0	0	0	0	0	0	0	0	0	0	0	0	0	0	0	0	0	0	0	0	0	0	0	0	0	0	0	0	0	0	0	0	0	0	0	0	0	0	0	0	0	0	0
D_0__Bacteria;D_1__Proteobacteria;D_2__Deltaproteobacteria;D_3__Oligoflexales;D_4__Oligoflexaceae;D_5__Silvanigrella	0	0.0179842	0	0	0	0	0	0	0	0	0	0	0	0	0	0	0	0	0	0	0	0	0	0	0	0	0	0	0	0	0	0	0	0	0	0	0	0	0	0	0	0	0	0	0	0	0	0
D_0__Bacteria;D_1__Proteobacteria;D_2__Deltaproteobacteria;D_3__SAR324 clade(Marine group B);Ambiguous_taxa;Ambiguous_taxa	0	0.0236635	0	0	0	0	0.00652529	0.0297011	0.0343256	0.0566868	0.0371867	0	0	0.00523524	0.0365163	0	0	0	0	0	0	0	0	0	0	0	0	0	0	0	0	0	0	0	0	0	0	0	0	0	0	0	0	0	0	0	0	0
D_0__Bacteria;D_1__Proteobacteria;D_2__Deltaproteobacteria;D_3__SAR324 clade(Marine group B);D_4__uncultured bacterium;D_5__uncultured bacterium	0	0	0	0	0	0	0	0	0.0190698	0	0	0	0	0	0	0	0	0	0	0	0.0273838	0	0	0	0	0	0	0	0	0	0	0	0.0331447	0	0	0.0550784	0	0	0	0	0	0	0	0	0	0	0	0
D_0__Bacteria;D_1__Proteobacteria;D_2__Deltaproteobacteria;__;__;__	0	0	0	0	0	0	0	0	0	0	0	0.00480094	0	0	0	0	0	0	0	0	0	0	0	0	0	0	0	0	0	0	0	0	0	0	0	0	0	0.00335525	0	0	0	0	0	0	0	0	0	0
D_0__Bacteria;D_1__Proteobacteria;D_2__Gammaproteobacteria;D_3__Aeromonadales;D_4__Aeromonadaceae;D_5__Aeromonas	0	0.0132516	0	0	0	0	0	0	0.0266977	0	0	0	0	0.00872539	0.0194754	0.0668213	0	0.016022	0	0.00967427	0	0.0200906	0	0	0	0	0.0121642	0.0167948	0	0	0.0307962	0	0	0	0	0.0305991	0	0	0	0	0	0	0	0	0	0	0	0
D_0__Bacteria;D_1__Proteobacteria;D_2__Gammaproteobacteria;D_3__Aeromonadales;D_4__Aeromonadaceae;D_5__Oceanisphaera	0	0	0	0.0183446	0	0	0	0	0	0	0	0	0	0	0	0	0	0	0.0287514	0	0	0	0	0	0	0	0	0	0	0	0	0	0	0	0	0	0	0	0	0	0	0	0	0	0	0	0	0
D_0__Bacteria;D_1__Proteobacteria;D_2__Gammaproteobacteria;D_3__Aeromonadales;D_4__Aeromonadaceae;D_5__Tolumonas	0.0399131	0	0.0366497	0.10273	0	0.0426197	0.00522023	0.0835344	0.0305116	0.0539874	0.0396658	0.0804158	0.0130095	0.132626	0.0340819	0.108093	0.0835126	0.064088	0.0566316	0.0532085	0	0	0	0	0	0	0	0	0	0	0	0.058199	0	0	0	0	0	0	0	0	0	0	0	0	0	0	0	0
D_0__Bacteria;D_1__Proteobacteria;D_2__Gammaproteobacteria;D_3__Alteromonadales;D_4__Alteromonadaceae;D_5__Glaciecola	0.0447027	0.00946539	0	0	0	0.0514988	0	0.0092816	0.0133488	0.0458893	0.0247911	0	0	0.0401368	0	0.017688	0	0	0.00609878	0	0.0273838	0	0.00672993	0.0152102	0	0	0	0	0	0	0	0	0	0	0.0350866	0.218274	0	0	0	0	0	0.00873927	0	0.129439	0.0299996	0	0.0102301	0.0276022
D_0__Bacteria;D_1__Proteobacteria;D_2__Gammaproteobacteria;D_3__Alteromonadales;D_4__Alteromonadaceae;D_5__Paraglaciecola	0	0	0	0	0	0	0	0	0	0	0	0	0	0	0	0	0	0	0	0	0	0	0	0	0	0	0	0	0	0	0	0.0260892	0	0	0	0	0	0	0	0	0	0	0	0	0	0	0	0
D_0__Bacteria;D_1__Proteobacteria;D_2__Gammaproteobacteria;D_3__Alteromonadales;D_4__Alteromonadaceae;D_5__Rheinheimera	0	0	0	0	0	0.0319648	0	0.0092816	0	0	0	0	0	0	0	0	0	0	0	0	0	0	0	0	0	0	0	0.0400491	0	0	0.144505	0	0.0242211	0	0	0	0	0	0	0	0	0	0	0	0	0	0	0
D_0__Bacteria;D_1__Proteobacteria;D_2__Gammaproteobacteria;D_3__Alteromonadales;D_4__Colwelliaceae;D_5__Colwellia	0.102178	0.0104119	0	0	0	0.0355164	0	0	0	0	0.028923	0	0	0	0.00730327	0	0	0	0	0	0	0	0	0	0	0	0	0	0	0	0	0	0	0	0	0	0	0	0.0334392	0	0	0	0	0	0	0	0	0
D_0__Bacteria;D_1__Proteobacteria;D_2__Gammaproteobacteria;D_3__Alteromonadales;D_4__Marinobacteraceae;D_5__Marinobacter	0	0	0	0	0	0	0	0	0	0	0	0	0	0	0	0	0	0	0	0	0	0	0	0	0	0	0	0	0	0	0	0	0	0	0	0	0	0	0	0	0	0	0	0	0	0	0	0
D_0__Bacteria;D_1__Proteobacteria;D_2__Gammaproteobacteria;D_3__Alteromonadales;D_4__Moritellaceae;D_5__Moritella	0.320902	0.229063	0.219898	0.264162	0.204194	0.506109	0.22969	0.280304	0.589256	0.4274	0.385089	0.30606	0.266696	0.359486	0.367598	0.363586	0.210905	0.24033	0.147242	0.138342	0.0328605	0.268904	0.547367	0.651272	0.0654764	0.468359	0	0	0.190504	0.239093	0.371923	0.297016	0.174647	0.00327364	0	0.679301	0.175029	0.0570393	0.156746	0	0	0.0873927	0.0125547	0.636698	0.116249	0.136276	0.170842	0.384979
D_0__Bacteria;D_1__Proteobacteria;D_2__Gammaproteobacteria;D_3__Alteromonadales;D_4__Pseudoalteromonadaceae;D_5__Pseudoalteromonas	0	0	0	0.0146757	0	0	0.00522023	0	0	0	0	0.00360071	0	0	0	0	0	0	0.0095838	0	0	0	0.0179465	0.0124447	0.00461101	0	0	0	0	0	0	0	0	0	0	0	0	0	0	0	0	0	0	0	0	0.0286012	0	0
D_0__Bacteria;D_1__Proteobacteria;D_2__Gammaproteobacteria;D_3__Alteromonadales;D_4__Psychromonadaceae;D_5__Psychromonas	0.094195	0.00662578	0.0298312	0.0330203	0.123368	0.0550504	0.187928	0.051977	0.0610233	0.0233945	0.0256175	0	0.00867303	0.0209409	0.086422	0.121851	0.0226475	0.0600825	0	0.0512736	0.0711978	0.165361	0.168248	0.0843473	0.00184441	0.103564	0	0.013565	0.0439625	0.174397	0.0473788	0.0561922	0.0586406	0.0360101	0.0797423	0.177475	0	0.0234868	0.0961378	0.0060186	0.0110263	0.0734099	0	0.0489767	0.0224997	0.0168243	0.0143221	0.117673
D_0__Bacteria;D_1__Proteobacteria;D_2__Gammaproteobacteria;D_3__Alteromonadales;D_4__Shewanellaceae;D_5__Psychrobium	0	0	0	0.187115	0	0	0	0	0	0	0	0	0	0	0	0	0	0	0	0	0	0	0	0	0	0	0	0	0	0	0	0	0	0	0	0	0	0	0	0	0	0	0	0	0	0	0	0
D_0__Bacteria;D_1__Proteobacteria;D_2__Gammaproteobacteria;D_3__Alteromonadales;D_4__Shewanellaceae;D_5__Shewanella	0.536433	0.42121	0.473037	0.469621	0.774237	0.525643	0.79478	0.592166	0.615954	0.709035	0.600772	0.397278	0.431483	0.680581	0.613475	0.723242	0.894576	1.54479	0.22217	0.899707	0.40528	0.840713	1.31907	1.31361	0.105131	1.73277	0.0113532	0.13565	1.36284	0.700402	0.644351	1.47103	0.0140227	0.0713654	0.0255175	0.0285592	0	0	0.0522488	0.0872697	0.101993	0.173038	0	0.0384817	0	0.0386958	0.0132991	7.61095
D_0__Bacteria;D_1__Proteobacteria;D_2__Gammaproteobacteria;D_3__Alteromonadales;__;__	0.0111757	0	0	0	0	0	0	0	0	0	0	0	0	0	0	0	0	0	0	0	0	0	0	0	0	0	0	0	0	0	0	0	0	0	0	0	0	0	0	0	0	0	0	0	0	0	0	0
D_0__Bacteria;D_1__Proteobacteria;D_2__Gammaproteobacteria;D_3__Betaproteobacteriales;D_4__Aquaspirillaceae;D_5__Rivicola	0.0223514	0	0	0	0	0	0	0	0	0	0.0123956	0	0	0	0	0	0	0	0	0	0	0	0	0	0	0	0	0	0	0	0	0	0	0	0	0	0	0	0	0	0	0	0	0	0	0	0	0
D_0__Bacteria;D_1__Proteobacteria;D_2__Gammaproteobacteria;D_3__Betaproteobacteriales;D_4__Burkholderiaceae;Ambiguous_taxa	0	0	0	0	0	0	0	0	0	0	0	0	0	0	0	0	0	0	0	0	0	0	0	0	0	0	0	0	0	0	0	0	0	0	0	0	0	0	0	0	0	0	0	0	0	0	0	0
D_0__Bacteria;D_1__Proteobacteria;D_2__Gammaproteobacteria;D_3__Betaproteobacteriales;D_4__Burkholderiaceae;D_5__AAP99	0	0	0	0	0	0	0	0	0	0	0	0	0	0	0	0	0	0	0	0	0	0	0	0	0	0	0	0	0	0	0	0	0	0	0	0	0	0	0	0	0	0	0	0	0	0	0	0
D_0__Bacteria;D_1__Proteobacteria;D_2__Gammaproteobacteria;D_3__Betaproteobacteriales;D_4__Burkholderiaceae;D_5__Achromobacter	0	0	0	0	0	0	0	0	0	0	0	0	0.0325239	0	0	0	0	0	0	0	0	0	0	0	0	0	0	0	0	0	0	0.0240824	0	0	0	0	0	0	0	0.0210651	0	0.0104871	0	0	0	0	0	0
D_0__Bacteria;D_1__Proteobacteria;D_2__Gammaproteobacteria;D_3__Betaproteobacteriales;D_4__Burkholderiaceae;D_5__Acidovorax	0.106967	0	0	0	0	0	0	0.0241322	0.0114419	0	0	0	0	0	0	0.0216186	0	0	0.0670866	0	0	0.0386357	0	0.0290376	0	0.0154574	0	0	0	0	0.210836	0	0	0	0	0	0	0	0	0	0	0	0	0	0	0	0	0
D_0__Bacteria;D_1__Proteobacteria;D_2__Gammaproteobacteria;D_3__Betaproteobacteriales;D_4__Burkholderiaceae;D_5__Alcaligenes	0	0	0	0	0	0	0	0	0	0	0	0	0	0	0	0	0	0	0	0	0	0	0	0	0	0	0	0	0	0	0	0	0	0	0	0	0	0	0	0	0	0	0	0	0	0	0	0
D_0__Bacteria;D_1__Proteobacteria;D_2__Gammaproteobacteria;D_3__Betaproteobacteriales;D_4__Burkholderiaceae;D_5__Alicycliphilus	0	0	0	0	0	0	0	0	0	0	0	0	0	0	0	0	0	0	0	0	0	0	0	0	0	0	0	0	0	0	0	0	0	0	0	0	0	0	0	0	0	0	0	0	0	0	0	0
D_0__Bacteria;D_1__Proteobacteria;D_2__Gammaproteobacteria;D_3__Betaproteobacteriales;D_4__Burkholderiaceae;D_5__Aquabacterium	0	0	0	0	0	0	0	0	0	0	0	0	0	0	0	0	0.0297248	0	0	0	0	0	0	0	0	0	0	0	0	0	0.0355341	0	0	0	0	0	0	0	0	0	0	0	0	0	0	0	0	0
D_0__Bacteria;D_1__Proteobacteria;D_2__Gammaproteobacteria;D_3__Betaproteobacteriales;D_4__Burkholderiaceae;D_5__Brachymonas	0	0.02461	0	0	0	0	0.00652529	0	0.0114419	0	0.0165274	0	0	0	0	0.0137573	0	0	0	0	0	0	0	0	0	0	0	0	0	0	0	0	0	0	0	0	0	0	0	0	0	0	0	0	0	0	0	0
D_0__Bacteria;D_1__Proteobacteria;D_2__Gammaproteobacteria;D_3__Betaproteobacteriales;D_4__Burkholderiaceae;D_5__Burkholderia-Caballeronia-Paraburkholderia	0.0127722	0	0.0144894	0.0366892	0	0.0745845	0.0143556	0.0241322	0	0.0458893	0.0231384	0	0.0346921	0	0.0133893	0	0.042464	0.0307088	0.0313652	0.0483713	0.104058	0.0386357	0	0.0470133	0	0.0602838	0.014597	0.0633034	0.0195389	0	0	0.0662265	0.0701137	0.0183324	0.0255175	0.101997	0.0208368	0	0	0.010031	0.0454834	0.0419485	0	0.0699668	0	0.0218715	0.0153451	0
D_0__Bacteria;D_1__Proteobacteria;D_2__Gammaproteobacteria;D_3__Betaproteobacteriales;D_4__Burkholderiaceae;D_5__Comamonas	0	0.0681508	0	0.0366892	0.0893351	0.0213098	0.0143556	0	0.0457675	0.0431899	0.0264439	0.0240047	0	0	0	0.0216186	0.0226475	0.024033	0.0296227	0.0232182	0.0328605	0.00772714	0.00672993	0.107854	0.0202885	0.0525551	0	0.0523222	0.0976944	0.182836	0.037903	0.0160549	0.0280455	0	0	0.0224394	0.0250042	0.00335525	0.0250794	0.0391209	0	0	0.00295406	0.0892076	0.0412495	0	0	0.0435825
D_0__Bacteria;D_1__Proteobacteria;D_2__Gammaproteobacteria;D_3__Betaproteobacteriales;D_4__Burkholderiaceae;D_5__Curvibacter	0	0	0	0	0	0	0	0	0	0	0	0.0420082	0	0.043627	0	0	0	0	0	0	0	0	0	0	0	0	0	0.0109812	0	0	0.11134	0	0.0267707	0	0	0	0	0	0	0	0	0	0	0	0	0	0	0
D_0__Bacteria;D_1__Proteobacteria;D_2__Gammaproteobacteria;D_3__Betaproteobacteriales;D_4__Burkholderiaceae;D_5__Delftia	0	0	0	0	0	0	0	0	0	0	0	0	0	0	0	0	0	0	0	0	0	0	0	0	0	0	0	0	0	0	0	0	0	0	0	0.0203994	0	0	0	0	0	0	0	0	0	0	0	0
D_0__Bacteria;D_1__Proteobacteria;D_2__Gammaproteobacteria;D_3__Betaproteobacteriales;D_4__Burkholderiaceae;D_5__Duganella	0	0	0	0	0	0	0	0	0	0	0	0	0	0	0	0	0	0	0	0	0	0.0370903	0	0	0	0.0479179	0	0	0	0	0	0	0.00509918	0	0	0	0	0	0	0	0	0	0	0	0	0	0	0
D_0__Bacteria;D_1__Proteobacteria;D_2__Gammaproteobacteria;D_3__Betaproteobacteriales;D_4__Burkholderiaceae;D_5__GKS98 freshwater group	0	0	0	0	0	0	0	0	0	0	0	0	0	0	0	0	0	0	0	0	0	0	0	0	0	0	0	0	0	0	0	0	0	0	0	0	0	0	0	0	0	0	0	0	0	0	0	0
D_0__Bacteria;D_1__Proteobacteria;D_2__Gammaproteobacteria;D_3__Betaproteobacteriales;D_4__Burkholderiaceae;D_5__Hydrogenophaga	0	0	0	0	0	0	0.0430669	0	0	0	0	0	0	0	0	0	0	0	0	0	0	0	0	0	0	0	0	0	0	0	0	0	0	0	0	0	0.0333389	0	0	0	0	0	0	0	0	0	0	0.0087165
D_0__Bacteria;D_1__Proteobacteria;D_2__Gammaproteobacteria;D_3__Betaproteobacteriales;D_4__Burkholderiaceae;D_5__Ideonella	0.0143687	0	0	0	0	0	0	0	0	0	0	0	0	0	0	0	0	0	0	0	0	0	0	0	0	0	0	0	0	0	0	0	0	0	0	0	0	0	0	0	0	0	0	0	0	0	0	0
D_0__Bacteria;D_1__Proteobacteria;D_2__Gammaproteobacteria;D_3__Betaproteobacteriales;D_4__Burkholderiaceae;D_5__Inhella	0	0	0	0	0	0	0	0	0	0	0	0	0.0650477	0	0	0	0	0	0	0.0309577	0	0	0	0	0	0	0	0	0	0	0	0	0	0	0	0.0122397	0	0	0	0	0	0	0	0	0	0	0	0
D_0__Bacteria;D_1__Proteobacteria;D_2__Gammaproteobacteria;D_3__Betaproteobacteriales;D_4__Burkholderiaceae;D_5__Janthinobacterium	0	0	0	0	0	0	0	0	0.0133488	0	0.0148747	0	0	0	0	0	0	0	0	0	0	0	0.00897324	0	0	0	0	0	0	0	0	0.0120412	0	0	0	0	0	0	0	0	0	0	0	0.0297359	0	0	0	0
D_0__Bacteria;D_1__Proteobacteria;D_2__Gammaproteobacteria;D_3__Betaproteobacteriales;D_4__Burkholderiaceae;D_5__Kerstersia	0	0	0	0	0	0	0	0	0	0	0	0	0	0	0	0	0	0	0	0	0	0	0	0	0	0	0	0	0	0	0	0	0	0	0	0	0	0	0	0	0	0	0	0	0	0	0	0
D_0__Bacteria;D_1__Proteobacteria;D_2__Gammaproteobacteria;D_3__Betaproteobacteriales;D_4__Burkholderiaceae;D_5__Leptothrix	0	0	0	0	0	0	0	0	0	0	0.00247911	0	0	0	0	0.00786133	0	0	0	0	0	0	0	0	0	0	0	0	0	0	0	0	0	0	0	0	0	0	0	0	0	0	0	0	0	0	0	0
D_0__Bacteria;D_1__Proteobacteria;D_2__Gammaproteobacteria;D_3__Betaproteobacteriales;D_4__Burkholderiaceae;D_5__Limnohabitans	0	0	0	0	0.085081	0.00710328	0.0130506	0.0111379	0	0	0.0661097	0.0156031	0.0997398	0.0139606	0.00608606	0	0	0	0.00522753	0.0532085	0	0	0	0.0152102	0	0.0602838	0.0267612	0.0678251	0.0683861	0	0.0947575	0.0602059	0	0	0	0.0815977	0	0	0	0	0.00964799	0	0	0	0	0.00504728	0	0.0087165
D_0__Bacteria;D_1__Proteobacteria;D_2__Gammaproteobacteria;D_3__Betaproteobacteriales;D_4__Burkholderiaceae;D_5__Massilia	0.0207548	0.0795093	0.0664809	0.0733783	0.0127622	0.0426197	0.0535073	0.0204195	0.0686512	0.103476	0.00991645	0.0708139	0.0390286	0.0331565	0.0255614	0.0255493	0.0311403	0	0.0339789	0.0154788	0.0602443	0.103544	0.170492	0.160398	0.0580988	0.194763	0.0105423	0	0.151426	0	0.180039	0.0200686	0	0	0.0223278	0	0	0	0	0.0521612	0	0	0.00295406	0.0804618	0.0562493	0	0	0
D_0__Bacteria;D_1__Proteobacteria;D_2__Gammaproteobacteria;D_3__Betaproteobacteriales;D_4__Burkholderiaceae;D_5__Methylibium	0	0	0	0	0	0	0	0	0	0	0	0	0	0	0	0	0	0	0	0	0	0	0	0	0	0	0	0	0	0.0450058	0	0	0	0	0	0	0	0	0	0	0	0	0	0	0	0	0	0
D_0__Bacteria;D_1__Proteobacteria;D_2__Gammaproteobacteria;D_3__Betaproteobacteriales;D_4__Burkholderiaceae;D_5__Oligella	0	0	0	0	0	0	0	0	0	0	0	0	0	0	0	0	0	0	0	0	0	0	0	0	0	0	0	0	0	0	0	0.0361235	0	0	0	0	0	0	0	0	0	0	0	0	0	0	0	0
D_0__Bacteria;D_1__Proteobacteria;D_2__Gammaproteobacteria;D_3__Betaproteobacteriales;D_4__Burkholderiaceae;D_5__Ottowia	0	0	0	0	0	0	0	0	0.0171628	0.0107975	0.0231384	0	0	0	0	0	0	0	0	0	0	0	0	0	0	0	0	0	0	0	0	0	0	0	0	0	0	0	0	0	0	0	0	0	0	0	0	0
D_0__Bacteria;D_1__Proteobacteria;D_2__Gammaproteobacteria;D_3__Betaproteobacteriales;D_4__Burkholderiaceae;D_5__Paenalcaligenes	0.0175618	0.00851886	0.0656285	0	0	0.0284131	0	0	0	0.0206952	0	0	0	0	0	0.0137573	0	0.0133517	0	0	0	0.0927257	0.0471095	0.00553097	0	0.0247318	0	0.0226084	0	0	0	0.0481647	0	0.0229155	0	0	0	0	0	0.010031	0	0	0	0.00874585	0	0	0.00818406	0
D_0__Bacteria;D_1__Proteobacteria;D_2__Gammaproteobacteria;D_3__Betaproteobacteriales;D_4__Burkholderiaceae;D_5__Pelomonas	0	0.00851886	0	0	0	0	0	0	0	0	0	0	0	0	0	0	0	0	0	0	0	0	0	0	0	0.0108202	0.00405472	0.0465086	0	0	0	0	0	0	0	0	0	0	0	0	0	0	0	0	0	0	0	0.0276022
D_0__Bacteria;D_1__Proteobacteria;D_2__Gammaproteobacteria;D_3__Betaproteobacteriales;D_4__Burkholderiaceae;D_5__Polaromonas	0	0	0.0119325	0	0	0	0	0	0	0	0.0256175	0	0	0	0	0	0	0	0	0	0	0	0	0	0	0.100473	0	0	0	0	0	0	0	0	0	0	0	0	0	0	0	0	0	0	0	0	0	0
D_0__Bacteria;D_1__Proteobacteria;D_2__Gammaproteobacteria;D_3__Betaproteobacteriales;D_4__Burkholderiaceae;D_5__Polynucleobacter	0.0159653	0.00662578	0.0272742	0	0.0425405	0.0213098	0	0	0	0.0251941	0.00247911	0	0	0.0261762	0.00730327	0	0.024063	0	0.101937	0.0415993	0	0.0139089	0	0	0	0	0	0.00645953	0.0830403	0.0562572	0.108971	0.014048	0.0254959	0	0	0	0	0.00335525	0.0292593	0	0	0	0.00147703	0	0	0	0.00613804	0
D_0__Bacteria;D_1__Proteobacteria;D_2__Gammaproteobacteria;D_3__Betaproteobacteriales;D_4__Burkholderiaceae;D_5__Pusillimonas	0	0	0	0	0	0	0	0	0	0	0	0	0	0	0	0	0	0	0	0	0	0	0	0	0	0	0	0	0	0	0	0.014048	0	0	0	0	0	0	0	0	0	0	0	0	0	0	0	0
D_0__Bacteria;D_1__Proteobacteria;D_2__Gammaproteobacteria;D_3__Betaproteobacteriales;D_4__Burkholderiaceae;D_5__RS62 marine group	0	0	0	0	0	0	0	0	0	0	0	0	0	0	0	0	0	0	0	0	0	0	0	0	0	0	0	0	0	0	0	0	0	0	0	0	0	0	0	0	0	0	0	0	0	0	0	0
D_0__Bacteria;D_1__Proteobacteria;D_2__Gammaproteobacteria;D_3__Betaproteobacteriales;D_4__Burkholderiaceae;D_5__Rhodoferax	0	0	0.0298312	0	0	0	0	0	0	0	0	0	0	0	0	0	0	0	0	0	0	0	0	0.0138274	0	0	0	0	0	0	0	0	0	0	0	0	0	0	0.0188096	0	0	0	0	0	0	0	0	0
D_0__Bacteria;D_1__Proteobacteria;D_2__Gammaproteobacteria;D_3__Betaproteobacteriales;D_4__Burkholderiaceae;D_5__Sphaerotilus	0	0	0	0	0	0.0088791	0	0.0185632	0	0.0125971	0	0	0	0.00698032	0	0	0	0	0	0	0	0	0	0	0	0	0	0	0	0	0	0	0	0	0	0	0	0	0	0	0	0	0	0.0682176	0	0	0	0
D_0__Bacteria;D_1__Proteobacteria;D_2__Gammaproteobacteria;D_3__Betaproteobacteriales;D_4__Burkholderiaceae;D_5__Sutterella	0.0510888	0.00851886	0.00852319	0.0917229	0	0	0	0.0148506	0.0438605	0.0476889	0	0.0420082	0	0	0.0486885	0.0963012	0.0184011	0.0587473	0.0200389	0	0	0	0	0	0	0	0	0	0	0	0	0.0762608	0	0	0	0	0	0	0.0271694	0	0	0	0	0	0	0	0	0
D_0__Bacteria;D_1__Proteobacteria;D_2__Gammaproteobacteria;D_3__Betaproteobacteriales;D_4__Burkholderiaceae;D_5__Tepidimonas	0	0	0	0	0	0	0	0	0	0	0	0	0	0	0	0	0	0	0	0	0	0	0	0	0	0	0	0	0	0	0	0	0	0.0124398	0	0	0	0	0	0	0	0	0	0	0	0	0	0
D_0__Bacteria;D_1__Proteobacteria;D_2__Gammaproteobacteria;D_3__Betaproteobacteriales;D_4__Burkholderiaceae;D_5__Undibacterium	0	0	0	0.0183446	0	0	0	0	0	0	0	0	0	0	0	0	0.00849281	0	0	0	0	0	0	0	0	0	0	0	0	0	0	0	0	0	0	0	0	0	0	0	0	0	0	0	0	0	0	0
D_0__Bacteria;D_1__Proteobacteria;D_2__Gammaproteobacteria;D_3__Betaproteobacteriales;D_4__Burkholderiaceae;D_5__Variovorax	0	0	0	0	0	0	0	0	0	0	0.0140483	0	0	0	0.0133893	0	0	0	0	0	0	0	0.0201898	0	0	0.0139116	0.00324378	0	0	0	0	0	0	0	0	0	0	0	0	0	0	0	0	0	0	0	0	0
D_0__Bacteria;D_1__Proteobacteria;D_2__Gammaproteobacteria;D_3__Betaproteobacteriales;D_4__Burkholderiaceae;D_5__Verticia	0	0	0	0	0	0	0	0	0	0	0	0	0	0	0	0	0	0	0	0	0	0	0.00897324	0	0	0	0	0	0	0	0	0	0	0	0	0	0	0	0	0	0	0	0	0	0	0	0	0
D_0__Bacteria;D_1__Proteobacteria;D_2__Gammaproteobacteria;D_3__Betaproteobacteriales;D_4__Burkholderiaceae;D_5__Xylophilus	0	0	0	0	0	0	0.0091354	0	0.0305116	0.0125971	0	0.0228045	0	0.0209409	0	0	0	0	0	0	0	0	0	0.0387168	0	0.00772869	0	0	0	0.168772	0	0.0120412	0	0	0	0	0	0	0.0188096	0	0	0	0	0	0	0	0	0.0203385
D_0__Bacteria;D_1__Proteobacteria;D_2__Gammaproteobacteria;D_3__Betaproteobacteriales;D_4__Burkholderiaceae;D_5__uncultured	0	0	0	0	0	0	0	0	0	0	0	0	0	0	0	0	0	0	0	0	0	0	0	0	0	0	0	0	0	0.0253157	0	0	0	0	0	0	0	0	0	0	0	0	0	0	0	0	0	0
D_0__Bacteria;D_1__Proteobacteria;D_2__Gammaproteobacteria;D_3__Betaproteobacteriales;D_4__Burkholderiaceae;__	0	0.0160912	0	0	0	0.0355164	0	0	0	0	0	0	0	0	0	0.00786133	0	0	0.0322364	0	0	0	0.00897324	0	0.00922203	0	0	0	0	0	0.0544856	0	0.0548162	0	0	0.101997	0	0	0	0.0451395	0	0	0	0.0384817	0	0	0.00409203	0
D_0__Bacteria;D_1__Proteobacteria;D_2__Gammaproteobacteria;D_3__Betaproteobacteriales;D_4__Chitinibacteraceae;D_5__Deefgea	0	0	0	0	0	0	0.0900489	0.0092816	0	0	0	0	0	0	0	0	0	0	0	0.00483713	0	0	0	0	0	0	0	0	0	0	0.310331	0.00401373	0	0	0	0.104037	0	0	0	0.0040124	0	0	0	0	0	0	0.0132991	0.0188857
D_0__Bacteria;D_1__Proteobacteria;D_2__Gammaproteobacteria;D_3__Betaproteobacteriales;D_4__Chromobacteriaceae;D_5__Aquitalea	0	0	0	0	0	0.0923427	0.0352365	0.0315575	0.0190698	0.0233945	0	0	0	0	0.0133893	0.0432373	0.0368022	0	0	0	0	0	0.0157032	0	0	0	0	0	0	0	0	0	0	0	0	0	0	0	0	0	0	0	0	0	0	0	0	0
D_0__Bacteria;D_1__Proteobacteria;D_2__Gammaproteobacteria;D_3__Betaproteobacteriales;D_4__Chromobacteriaceae;D_5__Gulbenkiania	0	0	0	0	0	0	0	0	0	0	0	0	0	0	0	0	0	0	0	0	0	0	0	0	0	0	0	0	0	0	0	0	0	0	0	0	0	0	0	0	0	0	0	0	0	0	0	0
D_0__Bacteria;D_1__Proteobacteria;D_2__Gammaproteobacteria;D_3__Betaproteobacteriales;D_4__Chromobacteriaceae;D_5__Paludibacterium	0	0	0	0	0	0	0	0	0.00762791	0	0	0	0	0	0	0	0	0	0	0	0	0	0	0	0	0	0	0	0	0	0	0	0	0	0	0	0	0	0	0	0	0	0	0	0	0	0	0
D_0__Bacteria;D_1__Proteobacteria;D_2__Gammaproteobacteria;D_3__Betaproteobacteriales;D_4__Chromobacteriaceae;D_5__Vogesella	0	0	0	0	0	0	0.00783034	0.0092816	0	0	0	0.0300059	0	0	0.0206926	0.0216186	0	0	0	0.0164463	0.0711978	0	0	0	0	0	0	0	0	0	0	0	0	0	0	0	0	0	0	0	0	0	0	0	0	0	0	0
D_0__Bacteria;D_1__Proteobacteria;D_2__Gammaproteobacteria;D_3__Betaproteobacteriales;D_4__Chromobacteriaceae;__	0	0	0	0	0	0	0.0208809	0	0	0	0	0	0	0	0	0	0	0	0	0	0	0	0	0	0	0	0	0	0	0	0	0	0	0	0	0	0	0	0	0	0	0	0	0	0	0	0	0
D_0__Bacteria;D_1__Proteobacteria;D_2__Gammaproteobacteria;D_3__Betaproteobacteriales;D_4__Gallionellaceae;D_5__Candidatus Nitrotoga	0	0	0	0	0	0	0	0	0	0	0	0.0108021	0	0	0	0	0	0	0	0.00386971	0	0	0	0	0	0	0	0	0	0	0	0	0	0	0	0	0	0	0	0	0	0	0	0	0	0	0	0
D_0__Bacteria;D_1__Proteobacteria;D_2__Gammaproteobacteria;D_3__Betaproteobacteriales;D_4__Hydrogenophilaceae;D_5__Tepidiphilus	0.210741	0.391867	0.545484	0.223804	0.395627	0.548729	0.203589	0.0779655	0.131581	0.0926784	0.0363603	0.246048	0.208153	0.0523524	0.0389508	0.0668213	0.100498	0.008011	0.107164	0.197355	0.0931048	0.0169997	0.145815	0.0926438	0.0129108	0.403438	0	0	0.122118	0	0.208467	0.0642196	0.0611901	0.0248797	0.10207	0.35699	0.216703	0.0201315	0.131667	0.0130403	0.114398	0.732351	0.0103392	0.2099	0.449994	0.0874861	0.0214832	0.525895
D_0__Bacteria;D_1__Proteobacteria;D_2__Gammaproteobacteria;D_3__Betaproteobacteriales;D_4__Hydrogenophilaceae;D_5__Thiobacillus	0	0	0	0	0	0	0	0	0	0	0	0	0	0	0	0	0	0	0	0	0	0	0.0201898	0	0	0	0	0	0	0	0	0	0	0	0	0	0	0	0	0	0	0	0	0	0	0	0	0
D_0__Bacteria;D_1__Proteobacteria;D_2__Gammaproteobacteria;D_3__Betaproteobacteriales;D_4__Methylophilaceae;D_5__Methylotenera	0	0	0	0	0	0	0	0	0	0	0	0	0	0	0	0	0.00990828	0	0	0	0	0	0	0.00829646	0	0	0	0	0.0390778	0	0	0	0	0	0	0	0	0	0	0	0	0	0	0	0	0	0	0
D_0__Bacteria;D_1__Proteobacteria;D_2__Gammaproteobacteria;D_3__Betaproteobacteriales;D_4__Methylophilaceae;D_5__OM43 clade	0	0	0	0	0	0	0	0	0	0	0.0636306	0	0	0	0	0	0	0	0	0	0	0	0	0	0	0	0	0	0	0	0	0	0.0535414	0	0	0.0428388	0	0.0117434	0	0	0	0	0	0	0	0	0	0
D_0__Bacteria;D_1__Proteobacteria;D_2__Gammaproteobacteria;D_3__Betaproteobacteriales;D_4__Methylophilaceae;__	0	0	0	0	0	0	0	0	0	0	0	0	0	0	0	0	0	0	0	0	0	0	0	0	0	0	0	0	0	0	0	0	0	0	0	0	0	0	0	0	0	0	0	0	0	0	0	0
D_0__Bacteria;D_1__Proteobacteria;D_2__Gammaproteobacteria;D_3__Betaproteobacteriales;D_4__Neisseriaceae;D_5__uncultured	0	0	0	0	0.0212703	0	0	0	0.00953489	0.0134969	0	0	0.0455334	0	0	0	0.0113237	0	0	0.0261205	0.0273838	0	0	0	0	0.00463722	0	0	0.0293083	0.101263	0	0.0160549	0	0	0	0	0	0	0	0	0	0.0227221	0	0.0297359	0	0.0185067	0	0
D_0__Bacteria;D_1__Proteobacteria;D_2__Gammaproteobacteria;D_3__Betaproteobacteriales;D_4__Nitrosomonadaceae;D_5__Nitrosomonas	0	0	0	0	0	0	0	0	0.0324186	0.00629853	0	0	0	0	0	0	0	0	0	0	0	0	0	0	0	0	0	0	0	0	0	0	0	0	0	0	0	0	0	0	0	0	0	0	0	0	0	0
D_0__Bacteria;D_1__Proteobacteria;D_2__Gammaproteobacteria;D_3__Betaproteobacteriales;D_4__Nitrosomonadaceae;__	0	0	0	0	0	0	0	0	0	0	0	0	0	0	0	0	0	0	0	0	0	0	0	0.0179757	0	0	0	0	0	0	0	0	0	0	0	0	0	0	0	0	0	0	0	0	0	0	0	0
D_0__Bacteria;D_1__Proteobacteria;D_2__Gammaproteobacteria;D_3__Betaproteobacteriales;D_4__Rhodocyclaceae;D_5__Azospira	0	0	0	0	0	0	0	0	0	0	0	0	0	0	0.00852048	0	0	0	0	0	0	0	0	0	0	0	0	0	0	0	0	0	0	0	0	0	0	0	0	0	0	0	0	0	0	0	0	0
D_0__Bacteria;D_1__Proteobacteria;D_2__Gammaproteobacteria;D_3__Betaproteobacteriales;D_4__Rhodocyclaceae;D_5__Dechloromonas	0	0	0	0	0.0170162	0	0	0	0	0	0	0	0	0.022686	0	0	0	0	0	0	0	0	0	0	0	0	0	0	0	0	0	0	0	0	0	0	0	0	0	0	0	0	0	0	0	0	0	0
D_0__Bacteria;D_1__Proteobacteria;D_2__Gammaproteobacteria;D_3__Betaproteobacteriales;__;__	0	0	0.021308	0	0	0	0	0	0	0	0.0751998	0	0	0	0	0	0	0.0854507	0	0	0.0821513	0	0	0	0	0.16694	0.0170298	0	0	0	0	0	0	0.038629	0	0	0	0	0	0	0	0.0192264	0	0.0192409	0.0749991	0	0	0.0261495
D_0__Bacteria;D_1__Proteobacteria;D_2__Gammaproteobacteria;D_3__CCM19a;D_4__uncultured bacterium;D_5__uncultured bacterium	0	0	0	0	0	0	0	0	0	0	0	0	0	0	0	0	0	0	0	0	0	0	0	0	0	0	0	0	0	0	0	0	0	0	0	0	0	0	0	0	0	0	0	0	0	0	0	0.0203385
D_0__Bacteria;D_1__Proteobacteria;D_2__Gammaproteobacteria;D_3__Cardiobacteriales;D_4__Wohlfahrtiimonadaceae;D_5__Ignatzschineria	0	0	0	0	0	0	0	0	0	0	0.0057846	0.0180035	0	0	0	0	0	0	0	0	0	0	0	0	0	0	0	0	0	0	0	0	0	0	0	0	0	0	0	0	0	0	0	0	0	0	0	0
D_0__Bacteria;D_1__Proteobacteria;D_2__Gammaproteobacteria;D_3__Cardiobacteriales;D_4__Wohlfahrtiimonadaceae;D_5__Koukoulia	0	0	0	0	0	0	0	0	0	0	0	0	0	0	0	0	0.00707734	0	0	0	0	0	0	0	0	0	0	0	0	0	0	0	0	0	0	0	0	0	0	0	0	0	0	0	0	0	0	0
D_0__Bacteria;D_1__Proteobacteria;D_2__Gammaproteobacteria;D_3__Cardiobacteriales;D_4__Wohlfahrtiimonadaceae;D_5__Wohlfahrtiimonas	0	0	0	0	0	0	0	0	0	0	0	0	0	0	0	0	0	0	0	0	0	0	0	0	0	0	0	0	0	0	0	0	0	0	0	0	0	0	0	0	0	0	0	0	0	0	0	0
D_0__Bacteria;D_1__Proteobacteria;D_2__Gammaproteobacteria;D_3__Cellvibrionales;D_4__Cellvibrionaceae;D_5__Cellvibrio	0	0	0.00511391	0	0	0	0	0.051977	0	0.0197954	0	0	0	0	0	0	0	0	0.0156826	0	0	0.0339994	0	0	0	0	0	0	0	0	0	0	0	0	0	0	0	0	0	0	0	0	0	0.122442	0	0	0	0
D_0__Bacteria;D_1__Proteobacteria;D_2__Gammaproteobacteria;D_3__Cellvibrionales;D_4__Halieaceae;D_5__Halioglobus	0	0	0	0	0	0	0	0	0	0	0	0	0	0	0	0	0	0	0	0	0	0	0	0	0	0	0	0	0	0	0	0	0	0	0	0	0	0	0	0	0	0	0	0	0	0	0	0
D_0__Bacteria;D_1__Proteobacteria;D_2__Gammaproteobacteria;D_3__Cellvibrionales;D_4__Halieaceae;D_5__Luminiphilus	0	0	0	0	0	0	0	0	0	0	0	0	0	0	0	0	0	0	0	0	0	0	0	0	0	0	0	0	0	0	0	0	0	0	0	0	0	0	0	0	0	0	0	0	0	0	0	0
D_0__Bacteria;D_1__Proteobacteria;D_2__Gammaproteobacteria;D_3__Cellvibrionales;D_4__Halieaceae;D_5__OM60(NOR5) clade	0	0	0.0161941	0	0	0	0	0	0	0	0	0.00360071	0	0	0	0	0.0283094	0	0	0	0	0	0	0	0	0	0	0	0	0	0.0473788	0	0	0	0	0	0	0.00838814	0	0	0	0.0279657	0	0.131188	0	0	0	0.0363187
D_0__Bacteria;D_1__Proteobacteria;D_2__Gammaproteobacteria;D_3__Cellvibrionales;D_4__Halieaceae;__	0	0	0.037502	0	0	0	0	0	0	0	0	0	0	0	0	0	0	0	0	0	0	0	0	0	0	0	0	0	0	0	0	0	0	0	0	0	0	0	0	0	0	0	0	0	0	0	0	0
D_0__Bacteria;D_1__Proteobacteria;D_2__Gammaproteobacteria;D_3__Cellvibrionales;D_4__Porticoccaceae;D_5__Porticoccus	0	0	0	0	0	0	0	0	0	0.0260939	0	0	0	0	0	0	0	0	0	0	0	0	0	0	0	0	0	0	0	0	0	0	0	0	0	0	0	0.00838814	0	0	0.00551314	0	0	0	0	0	0	0.052299
D_0__Bacteria;D_1__Proteobacteria;D_2__Gammaproteobacteria;D_3__Cellvibrionales;D_4__Porticoccaceae;D_5__SAR92 clade	0	0	0	0	0	0	0	0	0	0	0	0	0	0.00523524	0	0	0	0.188259	0.0313652	0.0503062	0.180733	0.0169997	0.0403796	0.109237	0.0267439	0.255047	0	0	0.131887	0	0.0994954	0.110377	0.036969	0	0.0127588	0.150956	0.0333389	0	0	0	0.0179177	0	0	0.0612209	0	0	0.0112531	0.0377715
D_0__Bacteria;D_1__Proteobacteria;D_2__Gammaproteobacteria;D_3__Cellvibrionales;D_4__Spongiibacteraceae;D_5__BD1-7 clade	0	0	0	0	0	0	0	0	0	0	0	0	0	0	0	0	0.0368022	0	0	0	0	0	0	0.0110619	0	0	0	0	0	0	0	0	0	0	0	0	0	0	0	0	0	0	0	0	0	0	0	0
D_0__Bacteria;D_1__Proteobacteria;D_2__Gammaproteobacteria;D_3__Cellvibrionales;D_4__Spongiibacteraceae;D_5__uncultured	0	0	0	0	0	0	0	0	0	0	0	0	0	0	0	0	0.0127392	0	0.0714429	0.0290228	0	0	0	0.0276549	0	0.0664668	0	0	0.0293083	0	0.0663303	0	0	0	0	0	0	0	0	0	0	0	0	0	0	0	0	0
D_0__Bacteria;D_1__Proteobacteria;D_2__Gammaproteobacteria;D_3__Chromatiales;D_4__Chromatiaceae;D_5__Candidatus Thiobios	0	0	0	0	0	0	0	0	0	0	0	0	0	0	0	0	0	0	0	0	0	0	0	0	0	0	0	0	0	0	0	0	0	0	0	0	0	0	0	0	0	0	0	0	0	0	0	0
D_0__Bacteria;D_1__Proteobacteria;D_2__Gammaproteobacteria;D_3__Coxiellales;D_4__Coxiellaceae;D_5__Coxiella	0.0175618	0	0	0	0	0	0	0	0	0	0	0	0	0	0	0	0	0	0	0	0	0	0	0	0	0	0	0	0	0	0	0	0	0	0	0	0	0	0	0	0	0	0	0	0	0	0	0
D_0__Bacteria;D_1__Proteobacteria;D_2__Gammaproteobacteria;D_3__Diplorickettsiales;D_4__Diplorickettsiaceae;D_5__Rickettsiella	0	0	0	0	0	0	0	0	0	0.0233945	0	0	0.0238508	0	0	0	0.00566187	0	0	0	0	0.00618171	0	0	0	0	0	0	0	0	0	0	0	0	0	0	0	0	0	0	0	0	0	0	0	0	0	0
D_0__Bacteria;D_1__Proteobacteria;D_2__Gammaproteobacteria;D_3__Diplorickettsiales;D_4__Diplorickettsiaceae;D_5__uncultured	0	0	0	0	0	0	0.00783034	0	0	0	0	0	0	0	0	0	0	0	0	0	0	0	0	0	0	0	0	0	0	0	0	0	0.0280455	0	0	0	0	0	0	0	0	0	0	0	0	0	0	0
D_0__Bacteria;D_1__Proteobacteria;D_2__Gammaproteobacteria;D_3__EV818SWSAP88;D_4__uncultured bacterium;D_5__uncultured bacterium	0	0	0	0	0	0	0	0.00742528	0	0	0	0	0	0	0	0	0	0	0	0	0	0	0	0.0345686	0	0	0	0	0	0	0	0	0	0	0	0	0	0	0	0	0	0	0	0	0	0	0	0
D_0__Bacteria;D_1__Proteobacteria;D_2__Gammaproteobacteria;D_3__Enterobacteriales;D_4__Enterobacteriaceae;D_5__Citrobacter	0	0	0	0	0	0	0	0.0241322	0	0	0	0	0	0	0	0	0	0	0.0165538	0.0348274	0	0	0	0	0	0	0	0	0	0	0	0	0	0	0	0	0	0	0	0	0	0	0	0	0	0	0	0
D_0__Bacteria;D_1__Proteobacteria;D_2__Gammaproteobacteria;D_3__Enterobacteriales;D_4__Enterobacteriaceae;D_5__Cronobacter	0	0	0	0	0	0	0	0	0	0	0	0	0	0	0	0	0	0	0	0	0	0	0.0179465	0	0	0	0	0	0	0	0	0	0	0	0	0	0	0	0	0	0	0	0	0	0	0	0	0
D_0__Bacteria;D_1__Proteobacteria;D_2__Gammaproteobacteria;D_3__Enterobacteriales;D_4__Enterobacteriaceae;D_5__Enterobacter	0	0	0	0	0	0	0	0	0	0	0	0	0	0	0	0	0	0	0	0	0	0	0	0	0	0	0	0	0	0	0	0.058199	0	0	0	0	0	0	0	0	0	0	0	0.106699	0	0	0	0
D_0__Bacteria;D_1__Proteobacteria;D_2__Gammaproteobacteria;D_3__Enterobacteriales;D_4__Enterobacteriaceae;D_5__Erwinia	0.0415097	0.0047327	0	0	0	0	0.0261011	0	0.0514884	0.0143966	0	0.00720141	0.0260191	0.022686	0.0413852	0.035376	0.024063	0	0	0.0609479	0	0	0.0471095	0.0815819	0.013833	0	0	0	0	0	0.0544856	0.100343	0	0	0	0	0	0	0	0	0	0	0	0	0	0	0.00613804	0
D_0__Bacteria;D_1__Proteobacteria;D_2__Gammaproteobacteria;D_3__Enterobacteriales;D_4__Enterobacteriaceae;D_5__Escherichia-Shigella	0	0	0	0	0	0	0.067863	0.0148506	0	0	0	0	0	0	0	0	0	0	0.316265	0	0	0	0	0	0.0165997	0.0340062	0	0	0.0293083	0.0928244	0	0	0.00892356	0	0.108449	0	0.0375063	0	0	0.0491519	0	0	0	0	0	0	0	0
D_0__Bacteria;D_1__Proteobacteria;D_2__Gammaproteobacteria;D_3__Enterobacteriales;D_4__Enterobacteriaceae;D_5__Hafnia-Obesumbacterium	0	0	0	0	0	0	0	0	0	0	0	0	0	0	0	0	0	0.0146868	0	0.0686873	0	0	0	0	0	0.0324605	0	0	0	0	0	0	0	0	0	0	0	0	0	0	0	0	0	0	0	0	0	0
D_0__Bacteria;D_1__Proteobacteria;D_2__Gammaproteobacteria;D_3__Enterobacteriales;D_4__Enterobacteriaceae;D_5__Klebsiella	0	0	0	0	0	0	0	0	0.0495814	0.0449895	0	0	0	0	0	0	0	0	0	0	0	0	0.0246764	0	0	0	0	0	0	0	0	0	0	0	0	0	0	0	0	0	0	0	0	0	0	0	0	0
D_0__Bacteria;D_1__Proteobacteria;D_2__Gammaproteobacteria;D_3__Enterobacteriales;D_4__Enterobacteriaceae;D_5__Kluyvera	0.00957916	0	0	0	0	0	0.0274062	0	0.0247907	0	0.0140483	0.0372073	0	0	0.063295	0	0	0.0507363	0.00784129	0.0338599	0	0	0	0	0	0	0	0	0	0	0	0	0	0	0	0	0	0	0	0	0	0	0	0	0	0	0	0
D_0__Bacteria;D_1__Proteobacteria;D_2__Gammaproteobacteria;D_3__Enterobacteriales;D_4__Enterobacteriaceae;D_5__Morganella	0	0	0	0	0	0	0	0	0	0.0404906	0	0	0	0	0	0	0.0325558	0	0.0095838	0	0	0	0	0.0262721	0.00737762	0.0200946	0	0	0	0	0	0	0	0	0	0	0	0	0	0	0	0	0	0	0	0	0	0
D_0__Bacteria;D_1__Proteobacteria;D_2__Gammaproteobacteria;D_3__Enterobacteriales;D_4__Enterobacteriaceae;D_5__Pantoea	0.18839	0.0634181	0.126143	0.187115	0.17867	0.0763603	0.144861	0.282161	0.162093	0.206052	0.0999909	0.117623	0.0173461	0.0994695	0.12659	0.129712	0.142962	0.128176	0.0322364	0.189616	0.147872	0.411084	0.549611	0.797843	0.0691652	0.431261	0	0.0736387	0.180735	0.773537	0.471419	0.0401373	0.0662893	0.0995188	0.092501	0.150956	0	0.0234868	0.140027	0.0270837	0.0151611	0	0	0.344586	0.142498	0.0891685	0.00818406	0.0886177
D_0__Bacteria;D_1__Proteobacteria;D_2__Gammaproteobacteria;D_3__Enterobacteriales;D_4__Enterobacteriaceae;D_5__Plesiomonas	0	0	0	0	0	0	0	0	0	0	0	0	0	0	0	0	0	0	0	0	0	0	0	0	0	0	0	0	0	0	0	0	0	0	0	0	0	0	0	0	0	0	0	0	0	0	0	0
D_0__Bacteria;D_1__Proteobacteria;D_2__Gammaproteobacteria;D_3__Enterobacteriales;D_4__Enterobacteriaceae;D_5__Pluralibacter	0	0	0	0	0	0	0	0	0	0	0	0	0	0	0	0	0	0	0	0	0	0	0	0	0	0	0	0	0	0	0	0	0	0	0	0	0	0	0	0	0	0	0	0	0	0	0	0
D_0__Bacteria;D_1__Proteobacteria;D_2__Gammaproteobacteria;D_3__Enterobacteriales;D_4__Enterobacteriaceae;D_5__Proteus	0	0.0388081	0	0	0	0	0	0	0	0	0.00826371	0	0	0.00872539	0	0.0196533	0	0	0	0	0	0	0	0.0096792	0	0	0	0	0.0244236	0	0	0	0	0	0	0	0	0	0	0	0	0	0	0	0	0	0	0
D_0__Bacteria;D_1__Proteobacteria;D_2__Gammaproteobacteria;D_3__Enterobacteriales;D_4__Enterobacteriaceae;D_5__Providencia	0	0	0	0	0	0	0	0	0	0	0	0	0	0	0	0	0.066527	0	0	0	0	0	0.029163	0	0	0	0	0	0	0	0	0	0	0	0	0	0	0	0	0	0	0	0	0	0	0	0	0
D_0__Bacteria;D_1__Proteobacteria;D_2__Gammaproteobacteria;D_3__Enterobacteriales;D_4__Enterobacteriaceae;D_5__Rahnella	0	0	0	0	0	0	0	0	0	0	0	0	0	0	0	0.0196533	0	0	0	0.0667524	0	0	0	0	0	0	0	0	0	0	0	0	0	0	0	0	0	0	0	0	0	0	0	0	0	0	0	0
D_0__Bacteria;D_1__Proteobacteria;D_2__Gammaproteobacteria;D_3__Enterobacteriales;D_4__Enterobacteriaceae;D_5__Salmonella	0	0	0.0485822	0.0220135	0	0	0.0156607	0	0	0	0.035534	0	0	0	0	0	0	0	0.108036	0	0.0602443	0.0123634	0	0	0	0	0	0	0	0	0.0331651	0	0.0522666	0.0438668	0.0382763	0	0	0	0	0.145449	0	0.0209743	0.00738514	0	0	0	0.0173911	0
D_0__Bacteria;D_1__Proteobacteria;D_2__Gammaproteobacteria;D_3__Enterobacteriales;D_4__Enterobacteriaceae;D_5__Serratia	0	0.00662578	0	0	0	0	0	0	0.0190698	0	0.0173538	0	0	0	0	0.145435	0	0	0	0	0	0.0185451	0	0	0	0	0	0	0	0	0	0	0	0	0	0	0	0	0	0	0	0	0	0.288613	0	0	0	0
D_0__Bacteria;D_1__Proteobacteria;D_2__Gammaproteobacteria;D_3__Enterobacteriales;D_4__Enterobacteriaceae;D_5__Sodalis	0	0	0	0	0	0	0	0	0	0	0	0	0	0	0	0	0	0	0	0	0	0	0	0	0	0	0	0	0	0	0	0	0	0	0	0	0	0	0	0	0	0	0	0.0384817	0	0	0	0
D_0__Bacteria;D_1__Proteobacteria;D_2__Gammaproteobacteria;D_3__Enterobacteriales;D_4__Enterobacteriaceae;D_5__Yersinia	0	0	0	0.0550338	0	0	0	0	0.00953489	0	0	0	0	0	0	0	0	0.0186923	0	0	0	0	0.0157032	0.0636062	0	0	0	0	0.0586166	0	0	0.0381304	0	0	0	0	0	0	0	0	0	0	0	0	0	0	0	0
D_0__Bacteria;D_1__Proteobacteria;D_2__Gammaproteobacteria;D_3__Enterobacteriales;D_4__Enterobacteriaceae;__	0	0.0397547	0.0579577	0	0.085081	0.0337406	0.0639478	0.0779655	0	0	0.0148747	0.0468092	0.0542064	0	0.0852048	0.196533	0.0594497	0.132182	0	0.0715896	0	0.10818	0.0179465	0.0207412	0	0	0	0	0	0	0.0497477	0	0	0	0	0	0	0	0.0208995	0	0	0.0611749	0	0.25188	0	0	0.00409203	0
D_0__Bacteria;D_1__Proteobacteria;D_2__Gammaproteobacteria;D_3__Ga0077536;Ambiguous_taxa;Ambiguous_taxa	0	0	0	0	0.0340324	0	0	0	0	0	0	0	0.0542064	0	0	0	0	0	0	0	0	0	0	0	0	0	0	0	0	0	0	0	0	0	0	0	0	0	0	0	0	0	0	0	0	0.0134594	0	0.011622
D_0__Bacteria;D_1__Proteobacteria;D_2__Gammaproteobacteria;D_3__Gammaproteobacteria Incertae Sedis;D_4__Unknown Family;D_5__metagenome	0	0	0	0	0	0	0	0	0	0.0179958	0	0	0	0	0	0	0	0	0	0	0	0	0	0	0	0	0	0	0	0	0	0	0	0	0	0	0	0	0	0	0	0	0	0	0	0	0	0
D_0__Bacteria;D_1__Proteobacteria;D_2__Gammaproteobacteria;D_3__KI89A clade;D_4__uncultured marine bacterium;D_5__uncultured marine bacterium	0	0	0	0	0	0	0	0	0	0	0	0	0	0	0	0.00786133	0	0	0	0	0	0	0	0	0	0	0	0	0	0	0	0	0	0	0	0.0428388	0	0	0	0	0	0	0	0	0	0	0	0
D_0__Bacteria;D_1__Proteobacteria;D_2__Gammaproteobacteria;D_3__Legionellales;D_4__Legionellaceae;D_5__Legionella	0	0	0.00340927	0	0	0	0	0	0	0	0	0	0	0	0.00608606	0	0.0268939	0	0.0261376	0	0	0	0	0	0	0	0	0	0	0	0	0.00802745	0	0	0	0	0	0	0	0	0	0	0	0.0594718	0	0	0	0
D_0__Bacteria;D_1__Proteobacteria;D_2__Gammaproteobacteria;D_3__Nitrosococcales;D_4__Methylophagaceae;D_5__Marine Methylotrophic Group 3	0	0	0	0	0	0	0	0	0	0	0	0	0	0	0	0	0	0	0.0453052	0	0	0	0	0.0124447	0	0.0123659	0	0	0	0	0	0	0	0	0	0	0	0	0	0	0	0	0	0	0	0	0	0
D_0__Bacteria;D_1__Proteobacteria;D_2__Gammaproteobacteria;D_3__Nitrosococcales;D_4__Methylophagaceae;D_5__uncultured	0	0	0	0	0	0	0	0	0	0	0	0	0	0	0	0	0	0	0	0	0	0	0.0224331	0	0	0.0139116	0	0	0	0	0	0	0	0	0	0	0	0	0	0	0	0	0	0	0	0	0	0
D_0__Bacteria;D_1__Proteobacteria;D_2__Gammaproteobacteria;D_3__OM182 clade;Ambiguous_taxa;Ambiguous_taxa	0	0	0	0	0	0	0	0	0	0.00629853	0	0	0	0	0	0	0	0	0	0	0	0	0	0.0096792	0	0	0	0	0	0	0	0.0100343	0.0101984	0	0	0.0224394	0	0	0	0	0.0179177	0	0	0.0734651	0.00749991	0	0	0.0392242
D_0__Bacteria;D_1__Proteobacteria;D_2__Gammaproteobacteria;D_3__OM182 clade;__;__	0	0	0	0	0	0	0	0	0	0	0	0	0	0	0	0	0	0	0	0	0	0	0	0.0262721	0.0147552	0.0262776	0	0	0	0	0	0	0	0	0	0	0	0	0	0	0	0	0	0	0	0	0	0
D_0__Bacteria;D_1__Proteobacteria;D_2__Gammaproteobacteria;D_3__Oceanospirillales;D_4__Alcanivoracaceae;D_5__Alcanivorax	0	0	0	0	0	0	0	0	0	0	0	0	0	0	0	0	0	0	0	0	0	0	0	0	0	0	0	0	0	0	0	0	0	0	0	0	0	0	0	0	0	0	0	0	0	0	0	0
D_0__Bacteria;D_1__Proteobacteria;D_2__Gammaproteobacteria;D_3__Oceanospirillales;D_4__Halomonadaceae;D_5__Halomonas	0	0	0.157679	0.0550338	0.0893351	0	0	0.746241	0	0	0.0371867	0	2.11839	0.0959793	0	0.151331	0.264693	1.58618	0.15944	0.1693	0	0	0.228818	0	0.00276661	0.30451	0	0.013565	0.34193	2.31217	0.11134	0.513757	0.116006	0	0	0.0917974	0	0	0.250794	0.108335	0	0.21149	0	0	0.153748	0	0	22.1544
D_0__Bacteria;D_1__Proteobacteria;D_2__Gammaproteobacteria;D_3__Oceanospirillales;D_4__Nitrincolaceae;D_5__uncultured	0	0	0	0	0	0	0	0.0482643	0	0	0	0	0	0	0	0	0	0	0.0200389	0.0125765	0	0.0123634	0.0426229	0	0.0110664	0.10511	0	0	0.0635014	0	0	0.0220755	0	0	0	0.110157	0	0.00671051	0	0	0.0840753	0	0	0.0699668	0	0	0	0.129295
D_0__Bacteria;D_1__Proteobacteria;D_2__Gammaproteobacteria;D_3__Oceanospirillales;D_4__Pseudohongiellaceae;D_5__Pseudohongiella	0	0	0	0	0	0	0	0	0	0	0	0	0	0	0	0	0	0	0	0	0	0	0	0	0	0	0	0	0	0	0	0	0.0356943	0.0392837	0	0	0	0	0	0.0080248	0	0	0	0	0	0	0	0.0305077
D_0__Bacteria;D_1__Proteobacteria;D_2__Gammaproteobacteria;D_3__Oceanospirillales;D_4__SS1-B-06-26;D_5__Escherichia coli	0	0	0	0	0	0	0	0	0	0	0	0	0	0	0	0	0	0	0	0	0	0	0	0	0	0	0	0	0	0	0	0	0	0	0	0	0	0	0	0	0	0	0	0	0	0	0	0
D_0__Bacteria;D_1__Proteobacteria;D_2__Gammaproteobacteria;D_3__Oceanospirillales;D_4__Saccharospirillaceae;D_5__Oleibacter	0	0	0	0	0	0	0	0	0	0	0	0	0	0	0	0	0	0	0	0	0	0	0	0	0	0	0	0	0	0	0	0	0	0	0	0	0	0	0	0	0	0	0	0	0	0	0	0
D_0__Bacteria;D_1__Proteobacteria;D_2__Gammaproteobacteria;D_3__Oceanospirillales;D_4__Saccharospirillaceae;D_5__Oleispira	0	0	0	0	0	0	0	0	0	0	0	0	0	0	0	0	0	0	0	0	0	0	0	0	0	0	0	0	0	0	0	0	0	0	0	0	0	0	0	0	0	0.0314614	0	0	0	0	0	0
D_0__Bacteria;D_1__Proteobacteria;D_2__Gammaproteobacteria;D_3__Pasteurellales;D_4__Pasteurellaceae;D_5__Haemophilus	0.0862124	0	0	0	0	0	0	0	0	0	0	0	0	0	0	0	0.024063	0	0	0	0	0	0	0	0	0	0	0	0	0	0	0	0	0	0	0	0	0	0	0	0	0	0	0	0	0	0	0
D_0__Bacteria;D_1__Proteobacteria;D_2__Gammaproteobacteria;D_3__Pasteurellales;D_4__Pasteurellaceae;__	0	0	0	0	0	0	0	0	0	0	0	0	0	0	0	0	0.0169856	0	0	0	0	0	0	0	0	0	0	0	0	0	0	0	0	0	0	0	0	0	0	0	0	0	0	0	0	0	0	0
D_0__Bacteria;D_1__Proteobacteria;D_2__Gammaproteobacteria;D_3__Pseudomonadales;D_4__Moraxellaceae;D_5__Acinetobacter	0.0590715	0.00851886	0.0818226	0.0330203	0	0.0284131	0.0130506	0.157787	0.0190698	0.0422901	0.0553669	0.0804158	0	0.0349016	0.0657294	0.0510986	0.00566187	0.0253682	0.0130688	0	0	0.196269	0.114409	0.042865	0.0165997	0.120568	0	0	0.0439625	0.0112514	0.0473788	0.0240824	0.0395186	0	0	0	0	0	0.0292593	0	0	0	0	0.0262375	0	0	0	0.017433
D_0__Bacteria;D_1__Proteobacteria;D_2__Gammaproteobacteria;D_3__Pseudomonadales;D_4__Moraxellaceae;D_5__Enhydrobacter	0.0271409	0.00283962	0.0289788	0.0110068	0	0	0.0091354	0	0	0.00719832	0	0	0.0455334	0.0139606	0.00365163	0.0275146	0	0	0	0	0	0	0.00897324	0	0	0	0	0	0	0	0.0450098	0	0	0	0	0	0	0	0	0	0	0.0856449	0	0	0	0	0	0
D_0__Bacteria;D_1__Proteobacteria;D_2__Gammaproteobacteria;D_3__Pseudomonadales;D_4__Moraxellaceae;D_5__Moraxella	0	0	0	0	0	0	0	0	0	0	0	0	0	0	0	0	0	0	0	0.0357948	0	0	0	0	0	0	0	0	0	0	0	0	0	0	0	0	0	0	0	0	0	0	0	0	0	0	0	0
D_0__Bacteria;D_1__Proteobacteria;D_2__Gammaproteobacteria;D_3__Pseudomonadales;D_4__Moraxellaceae;D_5__Psychrobacter	0.0271409	0	0	0.0146757	0.110605	0.00532746	0.0261011	0.0631149	0.0209768	0.0368914	0.0594987	0.040808	0	0.0244311	0.0279959	0.00982666	0.0410486	0.040055	0.0226526	0.0222508	0.0164303	0.194724	0.127869	0.0525442	0.013833	0.0324605	0	0.0852658	0	0.0281286	0.0165826	0	0	0.0582709	0.082932	0.00407988	0.0916819	0.00671051	0.0961378	0.0541674	0.0110263	0	0	0.0524751	0.0224997	0	0	0.092976
D_0__Bacteria;D_1__Proteobacteria;D_2__Gammaproteobacteria;D_3__Pseudomonadales;D_4__Moraxellaceae;D_5__[Agitococcus] lubricus group	0	0	0	0	0	0	0	0	0	0	0	0	0	0	0	0	0	0	0	0	0	0	0	0	0	0	0	0	0	0	0	0	0	0	0	0	0	0	0	0	0	0	0	0	0	0	0	0
D_0__Bacteria;D_1__Proteobacteria;D_2__Gammaproteobacteria;D_3__Pseudomonadales;D_4__Moraxellaceae;D_5__uncultured	0	0	0	0	0	0	0	0.0222758	0	0	0	0	0	0	0.00730327	0	0	0	0	0	0	0	0.0134599	0	0	0	0	0	0	0	0	0	0.0777625	0	0	0	0	0	0	0	0	0	0	0	0	0	0	0
D_0__Bacteria;D_1__Proteobacteria;D_2__Gammaproteobacteria;D_3__Pseudomonadales;D_4__Pseudomonadaceae;D_5__Azotobacter	0	0	0	0	0	0	0	0	0	0	0.0495823	0	0	0	0	0	0	0	0	0	0	0	0	0	0	0	0	0	0	0	0	0	0	0	0	0	0	0	0	0	0	0	0	0	0	0	0	0
D_0__Bacteria;D_1__Proteobacteria;D_2__Gammaproteobacteria;D_3__Pseudomonadales;D_4__Pseudomonadaceae;D_5__Oblitimonas	0	0	0	0	0	0	0	0	0	0	0	0	0	0	0	0	0	0	0	0	0	0	0	0	0	0	0	0	0	0	0	0	0	0	0	0	0	0	0	0	0	0	0	0	0	0	0	0
D_0__Bacteria;D_1__Proteobacteria;D_2__Gammaproteobacteria;D_3__Pseudomonadales;D_4__Pseudomonadaceae;D_5__Pseudomonas	0.0989846	0.145767	0.0698901	0.0623716	0.0425405	0.0177582	0.12137	0.382402	0.177349	0.120572	0.145441	0.0492096	0.134432	0.0628228	0.159455	0.202429	0.0155702	0.256352	0	0.0599805	0.0328605	1.25489	1.33028	1.47954	0.202885	2.27842	0.0235174	0.0607196	0.429855	2.13496	1.43084	0.44151	0.165723	0.0111304	0.251986	0.236633	0	0.0301973	0.378281	0.277859	0.100615	0.096132	0.0140318	0.659437	0.134998	0.0891685	0.0439893	0.370451
D_0__Bacteria;D_1__Proteobacteria;D_2__Gammaproteobacteria;D_3__Pseudomonadales;D_4__Pseudomonadaceae;__	0	0	0	0	0	0	0	0	0	0	0	0	0	0	0	0	0	0	0	0	0	0	0	0	0	0	0	0	0	0	0	0	0	0	0	0	0	0	0	0	0	0	0	0	0	0	0	0
D_0__Bacteria;D_1__Proteobacteria;D_2__Gammaproteobacteria;D_3__SAR86 clade;D_4__metagenome;D_5__metagenome	0	0	0	0	0	0	0	0	0	0	0	0	0	0	0	0	0	0	0	0	0	0	0	0	0	0	0	0	0	0	0	0	0	0	0	0	0.0791799	0	0	0	0	0	0	0	0	0	0	0
D_0__Bacteria;D_1__Proteobacteria;D_2__Gammaproteobacteria;D_3__SAR86 clade;D_4__uncultured marine bacterium;D_5__uncultured marine bacterium	0	0	0	0	0	0	0	0	0	0	0	0	0	0	0	0	0	0	0	0	0	0	0	0	0	0	0	0	0	0	0	0	0	0	0	0	0	0	0	0	0	0	0	0	0	0.011777	0	0
D_0__Bacteria;D_1__Proteobacteria;D_2__Gammaproteobacteria;D_3__SAR86 clade;__;__	0	0.00567924	0	0.0220135	0	0.0142066	0.0130506	0	0.0171628	0.0305929	0	0	0	0.0279213	0.00973769	0	0	0	0	0	0	0.00309086	0	0	0	0	0	0	0.0390778	0	0	0	0.121106	0.0451763	0.181812	0.634422	0	0.0184539	0.121217	0	0.0385919	0.0174785	0	0.117194	0.0524993	0	0.0132991	0.312341
D_0__Bacteria;D_1__Proteobacteria;D_2__Gammaproteobacteria;D_3__Steroidobacterales;D_4__Woeseiaceae;D_5__Woeseia	0	0	0	0	0	0	0	0	0	0	0	0	0	0	0	0	0	0	0	0	0	0	0	0	0	0	0	0	0	0	0	0	0	0	0	0	0	0	0	0	0	0	0	0.0297359	0	0	0	0
D_0__Bacteria;D_1__Proteobacteria;D_2__Gammaproteobacteria;D_3__Thiomicrospirales;D_4__Thioglobaceae;Ambiguous_taxa	0.0159653	0.0179842	0	0.0256824	0.0127622	0.0532746	0.00652529	0	0.0266977	0.0764822	0.00743734	0	0	0.0174508	0	0.0216186	0	0	0	0	0	0	0	0	0	0	0	0	0	0	0	0	0	0	0	0	0	0	0	0	0	0	0	0	0	0	0	0.0130747
D_0__Bacteria;D_1__Proteobacteria;D_2__Gammaproteobacteria;D_3__Thiomicrospirales;D_4__Thioglobaceae;D_5__SUP05 cluster	0	0.0586854	0.0102278	0	0.0765729	0.108325	0	0	0.0228837	0.0818809	0	0	0	0	0.00730327	0.0393066	0	0	0	0	0	0	0	0.053927	0	0	0	0	0	0	0	0	0	0	0	0.157076	0	0.026842	0.0250794	0.0521612	0.0165394	0.0192264	0	0	0.0374995	0	0.0163681	0.140917
D_0__Bacteria;D_1__Proteobacteria;D_2__Gammaproteobacteria;D_3__Thiotrichales;D_4__Thiotrichaceae;D_5__Thiothrix	0	0	0	0	0	0	0	0	0	0	0.00247911	0	0	0	0	0	0	0	0	0	0	0	0	0	0	0	0	0	0	0	0	0.00802745	0	0	0	0	0	0	0	0	0	0	0	0	0	0	0	0
D_0__Bacteria;D_1__Proteobacteria;D_2__Gammaproteobacteria;D_3__Thiotrichales;D_4__Thiotrichaceae;D_5__uncultured	0	0	0	0	0	0	0	0	0	0	0	0	0	0	0	0.017688	0	0	0	0	0	0	0	0	0	0	0	0	0	0	0	0	0	0	0	0	0	0	0	0	0	0	0	0	0	0	0	0
D_0__Bacteria;D_1__Proteobacteria;D_2__Gammaproteobacteria;D_3__UBA10353 marine group;Ambiguous_taxa;Ambiguous_taxa	0	0.00378616	0	0	0	0	0	0.0148506	0	0	0	0.00720141	0	0	0	0	0	0	0	0	0	0	0	0	0	0	0	0	0	0	0	0	0.00637397	0	0	0	0	0	0	0	0	0	0	0	0	0	0	0.0130747
D_0__Bacteria;D_1__Proteobacteria;D_2__Gammaproteobacteria;D_3__Vibrionales;D_4__Vibrionaceae;D_5__Aliivibrio	0.0862124	0.124943	0.130405	0.0403581	0.0467946	0.179358	0.147471	0.12623	0.085814	0.141267	0.0594987	0.0840165	0.0173461	0.181488	0.127807	0.188672	0.116068	0	0	0.100612	0.0273838	0.140634	0.201898	0.293142	0.00922203	0.367886	0.0129751	0.0717008	0.0732708	0	0.0236894	0.10235	0.126205	0.321472	1.77347	0.273352	0.0583431	74.1763	0.363652	0.0862666	0.107506	0.02447	0	0.37957	0.0749991	0.05552	2.29767	0.265853
D_0__Bacteria;D_1__Proteobacteria;D_2__Gammaproteobacteria;D_3__Vibrionales;D_4__Vibrionaceae;D_5__Photobacterium	8.19018	8.35889	5.43268	6.17112	5.31756	9.79187	9.1615	7.19696	7.29991	11.1898	7.07539	5.72392	4.24111	7.55794	10.6482	10.6265	6.75178	6.68118	3.38744	9.11123	4.84145	22.4798	38.6634	29.4718	3.43244	28.2808	0.741203	2.71365	9.07093	6.52584	15.8956	12.0873	5.49309	85.3937	5.00781	15.3995	2.43374	1.50651	15.0393	1.73035	2.00678	2.6078	98.1227	21.8384	2.19372	2.8147	57.316	5.44055
D_0__Bacteria;D_1__Proteobacteria;D_2__Gammaproteobacteria;D_3__Vibrionales;D_4__Vibrionaceae;D_5__Vibrio	0.030334	0.0908678	0.0767087	0	0.119113	0.0213098	0.0600326	0.0482643	0.0152558	0.0359916	0.057846	0.0804158	0.0368604	0.0558425	0.102246	0.0963012	0.0566187	0	0	0.0415993	0	0.021636	0.150302	0.113385	0.0230551	0.168485	0	0	0.0830403	0	0.0355341	0	0	0	0.0797423	0	0	0	0	0.0070217	0	0	0	0	0	0	0	0
D_0__Bacteria;D_1__Proteobacteria;D_2__Gammaproteobacteria;D_3__Vibrionales;D_4__Vibrionaceae;__	0	0	0	0	0	0.0106549	0.0182708	0	0	0	0	0	0	0	0	0	0	0	0	0	0	0	0	0	0.00276661	0	0	0	0	0	0	0	0	0	0	0	0	0	0	0	0	0	0	0	0	0	0	0
D_0__Bacteria;D_1__Proteobacteria;D_2__Gammaproteobacteria;D_3__Xanthomonadales;D_4__Rhodanobacteraceae;D_5__Luteibacter	0	0	0	0	0	0	0	0	0	0	0	0	0	0	0	0	0.00707734	0	0	0	0	0	0	0	0	0.0865614	0	0	0	0	0	0	0	0	0	0	0	0	0	0	0	0	0	0	0	0	0	0
D_0__Bacteria;D_1__Proteobacteria;D_2__Gammaproteobacteria;D_3__Xanthomonadales;D_4__Rhodanobacteraceae;D_5__Tahibacter	0	0	0	0	0	0	0	0	0	0	0	0	0	0	0	0	0	0	0	0	0	0	0	0	0	0	0	0	0	0	0	0	0	0	0	0	0	0	0	0	0	0	0	0	0	0	0	0
D_0__Bacteria;D_1__Proteobacteria;D_2__Gammaproteobacteria;D_3__Xanthomonadales;D_4__Xanthomonadaceae;D_5__Luteimonas	0	0	0	0	0	0	0	0	0	0	0	0	0	0	0	0	0	0	0	0	0	0.0525445	0	0	0	0	0	0	0	0	0	0	0	0	0	0.0428388	0	0	0	0	0	0	0	0	0	0	0	0
D_0__Bacteria;D_1__Proteobacteria;D_2__Gammaproteobacteria;D_3__Xanthomonadales;D_4__Xanthomonadaceae;D_5__Lysobacter	0	0	0	0	0.0170162	0	0.00522023	0	0.00572093	0	0	0	0	0	0.00365163	0	0	0	0	0	0	0	0	0	0	0.00463722	0	0	0	0	0	0	0	0	0	0	0	0	0	0	0	0	0	0	0	0	0	0
D_0__Bacteria;D_1__Proteobacteria;D_2__Gammaproteobacteria;D_3__Xanthomonadales;D_4__Xanthomonadaceae;D_5__Pseudoxanthomonas	0.0383166	0.00662578	0.0392067	0	0.0255243	0.0514988	0.0130506	0	0.0133488	0	0	0	0.0108413	0	0.0109549	0	0.0495414	0	0.109778	0	0	0.0309086	0.0830024	0.0414823	0.0110664	0.035552	0	0	0.00976944	0.0168772	0.0805439	0	0.0203967	0.014404	0.0223278	0	0	0.00671051	0.0229895	0.0381178	0	0.0559313	0	0.0909568	0.00749991	0.023554	0.0102301	0.0769957
D_0__Bacteria;D_1__Proteobacteria;D_2__Gammaproteobacteria;D_3__Xanthomonadales;D_4__Xanthomonadaceae;D_5__Silanimonas	0	0	0	0	0	0	0	0	0	0.0377912	0	0	0	0	0	0	0	0	0	0	0	0	0	0	0	0	0	0	0	0	0	0	0	0	0	0	0	0	0	0	0	0	0	0	0	0	0	0
D_0__Bacteria;D_1__Proteobacteria;D_2__Gammaproteobacteria;D_3__Xanthomonadales;D_4__Xanthomonadaceae;D_5__Stenotrophomonas	0.0526854	0.0047327	0.0485822	0.0366892	0.0255243	0	0.0091354	0.0111379	0.00762791	0	0	0	0.0260191	0	0.00730327	0	0.0353867	0	0.0182963	0	0.0328605	0	0.0493528	0.0511615	0	0.0154574	0	0	0	0.0365672	0.175301	0.0321098	0	0	0	0	0	0	0.00626985	0	0	0	0	0	0	0.0319661	0	0
D_0__Bacteria;D_1__Proteobacteria;D_2__Gammaproteobacteria;D_3__Xanthomonadales;D_4__Xanthomonadaceae;D_5__uncultured	0	0	0	0	0	0	0	0	0	0	0	0	0	0	0	0	0	0	0	0	0	0	0	0.0193584	0	0	0	0	0	0	0	0	0	0	0	0	0	0	0	0	0	0	0	0	0	0	0	0
D_0__Bacteria;D_1__Proteobacteria;D_2__Gammaproteobacteria;D_3__uncultured;D_4__metagenome;D_5__metagenome	0	0	0	0	0	0	0	0	0	0	0	0	0	0	0	0	0	0	0	0	0	0	0	0.00691372	0	0	0	0	0	0	0	0	0	0	0	0	0	0	0	0	0	0	0	0	0	0	0	0
D_0__Bacteria;D_1__Proteobacteria;D_2__Gammaproteobacteria;__;__;__	0	0	0	0	0	0.0248615	0	0	0	0	0	0	0	0	0	0	0	0	0	0.013544	0	0.010818	0	0	0	0	0	0	0	0.00562572	0	0	0.00892356	0	0	0	0	0	0	0	0.0330788	0	0	0	0	0	0	0
D_0__Bacteria;D_1__Proteobacteria;__;__;__;__	0	0	0	0	0	0.0248615	0	0	0	0	0	0	0.0433651	0	0	0	0	0	0	0.0154788	0	0	0	0	0	0	0	0	0	0	0	0	0	0	0	0	0	0	0.0250794	0	0.0220525	0	0	0	0	0	0	0
D_0__Bacteria;D_1__Spirochaetes;D_2__Leptospirae;D_3__Leptospirales;D_4__Leptospiraceae;D_5__Turneriella	0	0	0	0	0	0	0	0	0	0	0	0	0	0	0	0	0	0	0	0	0	0	0	0	0	0	0	0	0	0	0	0	0	0	0	0	0	0	0	0	0	0	0	0	0	0	0	0
D_0__Bacteria;D_1__Spirochaetes;D_2__Spirochaetia;D_3__Brevinematales;D_4__Brevinemataceae;D_5__Brevinema	0.0063861	0	0	0	0	0.00355164	0	0	0	0	0	0	0	0	0	0	0	0.0120165	0.00697004	0	0	0	0	0	0	0.00618295	0	0	0	0	0	0	0	0	0.0733629	0	0	0	0.0146297	0.0040124	0.0137828	0	0	0.00524751	0.00749991	0	0	0
D_0__Bacteria;D_1__Spirochaetes;D_2__Spirochaetia;D_3__Spirochaetales;D_4__Spirochaetaceae;D_5__Sphaerochaeta	0	0	0	0.0146757	0	0	0	0.00742528	0.0171628	0.00539874	0	0.00480094	0	0	0.00243442	0	0.0339712	0.0413902	0	0.00677199	0.043814	0.0401811	0.0179465	0.0649889	0.0129108	0.0726497	0	0	0	0	0.037903	0.0100343	0	0	0	0.00611983	0	0	0	0	0	0	0.00147703	0	0	0.0269188	0	0
D_0__Bacteria;D_1__Tenericutes;D_2__Mollicutes;D_3__Acholeplasmatales;D_4__Acholeplasmataceae;D_5__Acholeplasma	0	0	0	0	0	0	0	0	0	0	0	0	0	0	0	0	0	0	0	0	0	0	0.0246764	0	0	0.0170031	0	0	0	0	0	0.0361235	0	0	0	0	0	0	0	0	0	0	0	0	0	0	0	0
D_0__Bacteria;D_1__Tenericutes;D_2__Mollicutes;D_3__Anaeroplasmatales;D_4__Anaeroplasmataceae;D_5__Anaeroplasma	0	0	0	0	0	0	0	0	0	0	0	0	0	0	0	0	0	0	0	0	0	0	0	0.0138274	0	0.0108202	0	0	0	0	0	0	0	0	0	0	0	0	0	0	0	0	0	0	0	0	0	0
D_0__Bacteria;D_1__Tenericutes;D_2__Mollicutes;D_3__Haloplasmatales;D_4__Haloplasmataceae;D_5__Haloplasma	0	0	0	0.0146757	0	0	0	0	0	0	0	0	0	0	0	0	0	0	0	0	0	0.0262723	0.0426229	0.0235066	0	0	0	0	0	0	0.0118447	0	0	0	0	0.0265192	0.0291715	0.0117434	0.0167196	0	0	0.02447	0	0	0.0374995	0.0185067	0	0.0421297
D_0__Bacteria;D_1__Tenericutes;D_2__Mollicutes;D_3__Izimaplasmatales;Ambiguous_taxa;Ambiguous_taxa	0.0478958	0	0.0272742	0.0146757	0	0.0586021	0	0	0.00953489	0.0242943	0	0.00480094	0	0	0	0	0	0	0	0	0	0	0	0.0345686	0	0	0	0	0	0	0.0450098	0	0	0	0	0	0	0	0	0	0	0	0.00590811	0	0.0487494	0	0	0.19031
D_0__Bacteria;D_1__Tenericutes;D_2__Mollicutes;D_3__Mollicutes Incertae Sedis;D_4__Unknown Family;D_5__Candidatus Phytoplasma	0	0	0	0	0	0	0	0	0	0	0	0	0	0	0	0	0	0	0	0	0	0.0695443	0.00897324	0.00691372	0.00368881	0	0	0	0	0	0.272428	0	0	0	0	0	0	0	0	0	0	0	0	0.0384817	0	0	0	0
D_0__Bacteria;D_1__Tenericutes;D_2__Mollicutes;D_3__Mycoplasmatales;D_4__Mycoplasmataceae;D_5__Mycoplasma	0.180407	0.035022	0.00511391	0.0330203	0.0340324	0.0124307	0.0091354	0.978281	0	0.226747	0	0	0	0.0471171	0.017041	0	0.666686	4.54758	18.847	0.0706222	0.262884	0.428084	0.58326	8.92423	0.700874	0.479179	98.7009	82.6529	51.7634	0.382549	0.414564	0.561922	65.8699	0.895014	64.4509	29.4792	80.6634	17.7711	57.3483	81.4998	83.196	80.9414	0.316084	12.2372	77.3953	70.5424	34.3976	13.3929
D_0__Bacteria;D_1__Thermotogae;D_2__Thermotogae;D_3__Thermotogales;D_4__Fervidobacteriaceae;D_5__Fervidobacterium	0	0	0	0	0	0	0	0	0	0	0	0	0	0	0	0	0	0	0	0	0	0	0	0	0	0	0	0	0	0	0	0	0	0	0	0	0	0	0	0	0	0	0	0	0	0	0	0
D_0__Bacteria;D_1__Thermotogae;D_2__Thermotogae;D_3__Thermotogales;D_4__Fervidobacteriaceae;D_5__Thermosipho	0	0	0	0	0	0	0	0	0	0	0	0	0	0	0	0	0	0	0	0	0	0	0	0	0	0	0	0	0	0	0	0	0	0	0	0	0	0	0	0	0	0	0	0	0	0	0	0
D_0__Bacteria;D_1__Thermotogae;D_2__Thermotogae;D_3__Thermotogales;D_4__Thermotogaceae;D_5__Thermotoga	0	0	0	0	0	0	0.00391517	0	0	0	0	0	0	0.00872539	0	0	0	0	0	0	0	0	0	0	0	0	0	0	0	0	0	0	0.00764877	0	0	0	0	0	0	0	0.00413485	0	0	0.0489767	0	0	0	0
D_0__Bacteria;D_1__Verrucomicrobia;D_2__Verrucomicrobiae;D_3__Chthoniobacterales;D_4__Chthoniobacteraceae;D_5__Chthoniobacter	0	0	0	0	0	0	0	0	0	0	0	0	0	0	0	0	0.00707734	0	0	0	0	0	0	0	0.00184441	0	0	0	0	0	0	0	0	0	0	0	0	0	0	0	0	0	0	0	0	0	0	0
D_0__Bacteria;D_1__Verrucomicrobia;D_2__Verrucomicrobiae;D_3__Chthoniobacterales;__;__	0	0	0	0	0	0	0	0	0	0	0	0	0	0	0	0	0	0	0	0	0	0	0	0	0	0	0	0	0	0	0	0	0	0	0	0	0	0	0	0	0	0	0	0	0	0	0	0
D_0__Bacteria;D_1__Verrucomicrobia;D_2__Verrucomicrobiae;D_3__Opitutales;D_4__Opitutaceae;D_5__Opitutus	0	0	0	0	0	0	0	0	0	0	0	0	0	0	0	0	0	0	0	0	0	0	0	0	0	0	0	0	0	0	0	0	0.0178471	0	0	0	0	0	0	0	0	0	0	0	0	0	0	0
D_0__Bacteria;D_1__Verrucomicrobia;D_2__Verrucomicrobiae;D_3__Opitutales;D_4__Puniceicoccaceae;D_5__Lentimonas	0	0	0	0	0	0	0	0	0	0	0	0	0	0	0	0	0	0	0	0	0	0	0	0	0	0	0	0	0	0	0	0	0	0	0.0446557	0.0244793	0	0	0.00835981	0	0	0	0	0	0	0	0	0
D_0__Bacteria;D_1__Verrucomicrobia;D_2__Verrucomicrobiae;D_3__Opitutales;D_4__Puniceicoccaceae;D_5__MB11C04 marine group	0	0	0	0	0	0	0	0	0	0	0	0	0	0	0	0	0	0	0	0	0	0	0	0	0	0	0	0	0	0	0	0	0.0267707	0	0	0	0	0	0	0	0.00689142	0	0	0	0	0	0	0
D_0__Bacteria;D_1__Verrucomicrobia;D_2__Verrucomicrobiae;D_3__Opitutales;D_4__Puniceicoccaceae;D_5__Verruc-01	0	0	0	0	0	0	0	0	0	0	0	0	0	0	0	0	0	0	0	0	0	0	0	0	0	0	0	0	0	0	0	0	0	0	0	0	0	0	0	0	0	0	0	0	0	0	0	0
D_0__Bacteria;D_1__Verrucomicrobia;D_2__Verrucomicrobiae;D_3__Pedosphaerales;D_4__Pedosphaeraceae;D_5__uncultured bacterium	0	0	0	0	0	0	0	0	0	0	0	0	0	0	0	0	0	0	0	0	0	0	0	0	0	0	0	0	0	0	0	0	0	0	0	0	0	0	0	0	0	0	0	0.0279867	0	0	0	0
D_0__Bacteria;D_1__Verrucomicrobia;D_2__Verrucomicrobiae;D_3__Verrucomicrobiales;D_4__DEV007;D_5__uncultured Verrucomicrobia bacterium	0	0	0	0	0	0	0	0	0	0	0	0	0	0	0	0	0	0	0	0	0	0	0	0	0	0	0	0.0109812	0	0	0	0	0	0	0	0	0	0	0.0041799	0	0	0	0	0	0	0	0	0
D_0__Bacteria;D_1__Verrucomicrobia;D_2__Verrucomicrobiae;D_3__Verrucomicrobiales;D_4__Rubritaleaceae;D_5__Luteolibacter	0	0	0	0	0	0	0	0	0	0	0	0	0	0	0.00243442	0	0	0	0	0	0	0	0	0	0	0	0	0	0	0	0	0	0	0	0	0.0305991	0	0	0	0	0	0	0	0	0	0	0	0
D_0__Bacteria;D_1__Verrucomicrobia;D_2__Verrucomicrobiae;D_3__Verrucomicrobiales;D_4__Verrucomicrobiaceae;D_5__Prosthecobacter	0	0	0.00426159	0	0	0	0	0	0	0	0	0	0	0	0	0	0	0	0	0	0	0	0	0	0	0	0.014597	0.00193786	0	0	0	0	0	0	0	0	0	0	0	0	0	0	0	0	0	0	0	0
D_0__Bacteria;D_1__Verrucomicrobia;D_2__Verrucomicrobiae;D_3__Verrucomicrobiales;D_4__Verrucomicrobiaceae;D_5__uncultured	0.0319305	0.0312358	0.0315358	0	0.140384	0.0106549	0.0495922	0.046408	0.0152558	0.0665845	0.0553669	0.0264052	0.0715525	0.0174508	0.040168	0.0491333	0.00707734	0.040055	0.111521	0.0454691	0	0.0417266	0.0448662	0.0359513	0.0129108	0.131388	0.0202736	0.0200245	0.0586166	0.15752	0.0260583	0.0280961	0.0650145	0.0883884	0.00956907	0.124436	0.0375063	0	0.0229895	0.0722232	0.0454834	0.0769056	0.00147703	0.0874585	0.0299996	0.0471079	0.0132991	0.0392242
D_0__Bacteria;D_1__Verrucomicrobia;D_2__Verrucomicrobiae;D_3__Verrucomicrobiales;D_4__Verrucomicrobiaceae;__	0	0	0	0	0	0	0	0	0	0	0	0	0	0	0	0	0	0	0	0	0	0	0	0	0	0	0	0	0	0	0	0	0	0	0	0	0	0	0	0	0	0	0	0.0139934	0	0	0	0
D_0__Bacteria;D_1__WPS-2;D_2__metagenome;D_3__metagenome;D_4__metagenome;D_5__metagenome	0	0	0	0	0	0	0	0	0	0	0	0	0	0	0	0	0	0.0360495	0	0	0	0	0	0	0	0	0	0	0	0	0	0	0	0	0	0	0	0	0	0	0	0	0	0	0	0	0	0
Sum	100	100	100	100	100	100	100	100	100	100	100	100	100	100	100	100	100	100	100	100	100	100	100	100	100	100	100	100	100	100	100	100	100	100	100	100	100	100	100	100	100	100	100	100	100	100	100	100
