# Supplementary material for: Exploring gut microbiota in adult Atlantic salmon (Salmo salar L.): Associations with gut health and dietary prebiotics
Source: Anim Microbiome. 2023 Oct 3;5:47. doi: 10.1186/s42523-023-00269-1 (PMC10548677; doi:10.1186/s42523-023-00269-1)
Supplement: Supplementary file 6 — Supplementary Material 6 [file 42523_2023_269_MOESM6_ESM.xlsx]

## Sheet: Ark1
Table S5:Detail of primer pairs used for real-time PCR assay in distal intestine
Function	Gene name	Acronym	Primer sequence (5'-->3')	Primer sequence (5'-->3')	Annealing temp	bp	Acc.no	Reference
			Forward	Reverse
Immune functions	Interleukin 8	il8	ATTGAGACGGAAAGCAGACG	CGCTGACATCCAGACAAATCT	60	136	NM_001140710	Fredriksen et al., 2011
	Interleukin-1 beta	il1β	GCTGGAGAGTGCTGTGGAAGA	TGCTTCCCTCCTGCTCGTAG	60	73	NM_001123582	Marjara et al., 2012
	Inteferon gamma	ifnγ	CTAAAGAAGGACAACCGCAG	CACCGTTAGAGGGAGAAATG	60	159	FJ263446	Marjara et al., 2012
	Transforming Growth Factor - beta	tgfβ	AGTTGCCTTGTGATTGTGGGA	CTCTTCAGTAGTGGTTTGTCG	60	191	EU082211	Lilleeng et al., 2009
	Interleukin 10	il10	CGCTATGGACAGCATCCT	AAGTGGTTGTTCTGCGTT	62	59	EF165028	Fredriksen et al., 2011
	Myeloid differentiation factor 88	myd88	GAC AAA GTT TGC CCT CAG TCT CT	CCG TCA GGA ACC TCA GGA TAC T	60	110	NM_001136545	Marjara et al., 2012
	Gamma-interferon-inducible lysosomal thiol reductase	gilt	ACGGAAATGCACACGAATCT	GCCTCCATGCAGTAGACGAT	60	148	BT047766	Marjara et al., 2012
	Cluster of differentiation 4	cd4α	GAGTACACCTGCGCTGTGGAAT	GGTTGACCTCCTGACCTACAAAGG	60	121	NM_001123611	Marjara et al., 2012
	Cluster of differentiation 8beta	cd8β	CGCACACACCTCAACAACTC	ATTGATGCGCAGTGTGAAAG	59	153	AY693394	Marjara et al., 2012
	Cluster of differentiation 3 γδ	cd3γδ	AAAGGCGCATGGACAGATCT	GCCCGCACAACATTAAAGCT	60	160	NM_001123621	Li et al., 2019
Barrier functions	Mucin-13	muc13	ATTGTCGGCACTGTTCTTGG	GGAGCTCTTCTTGGACGTCT	60	88	DY723445	Kortner et al., 2011
	Mucin-2	muc2	TCTGTCCTGATGGGATGAAAC	GGACTCCAAACAAACGCAAT	60	143	CK885177	Sahlmann et al., 2013
	ZO-1	zo-1	CAAAGCCAGTGTATGCCCAG	CAGCTTCATACTCGGCCTGA	60	119	XM_014175464.1	Hu et al., 2016
	E-cadherin	e-cadherin	ACTATGACGAGGAGGGAGGT	TGGAGCGATGTCATTACGGA	60	107	BT058864.1	Hu et al., 2016
	Claudin 15	claudin-15	GGCACGTCTGAGAAACAACA	TAGGAAGTGGCAGCCTGACT	60	92	BK006395	Tipsmark et al., 2010
	Cladin 25b	claudin-25b	CCTGTAAGAGGGGTCCATCA	TGACACATGTTCTGCCCTGT	60	101	BK006399	Tipsmark et al., 2010
	Occludin	occludin	GACAGTGAGTTCCCCACCAT	ATCTCTCCCTGCAGGTCCTT	60	101	NM_001173656.1	Tipsmark et al., 2010
Metabolism functions	Sodium and chloride dependent taurine transporter	slc6a6	GGAGGTGGAAGGACAGATCA	ACATGCCACCTTTCGTTACC	60	143	NM_001139800	Kortner et al., 2012
	Peptide transporter	pept	GGCTTTCTGCTCTGTGAAGG	TAGGGGGACACAACAAGACC	55	89	NM_001146682	Kortner et al., 2012
	Aquaporin-8 ab	aqp8 ab	GTTGGCATAGTTCTCCTTTGATG	TTTCAACCCTCCCTTCACC	60	148	KC626879.1	Kortner et al., 2012
	Proliferating Cell Nuclear Antigen	pcna	TGAGCTCGTCGGGTATCTCT	GTCCTCATTCCCAGCACACT	55	170	BT056931	Kortner et al., 2013
	Catalase	cat	CCCAAGTCTTCATCCAGAAACG	CGTGGGCTCAGTGTTGTTGA	60	101	BG935638	Hamre et al., 2016
	Heat shock protein 70	hsp70	CCCCTGTCCCTGGGTATTG	CACCAGGCTGGTTGTCTGAGT	60	121	BG933934	Sagstad et al., 2008
	Superoxide dismutase	sod	CCACGTCCATGCCTTTGG	TCAGCTGCTGCAGTCACGTT	55	140	BG936553	Hamre et al., 2016
Reference genes	RNA polymerase II	rnapoii	CCAATACATGACCAAATATGAAAGG	ATGATGATGGGGATCTTCCTGC	60	157	BG936649	Kortner et al., 2011
	hypoxanthine phosphoribosyl transferase 1	hprt1	CCGCCTCAAGAGCTACTGTAAT	GTCTGGAACCTCAAACCCTATG	60	255	BT043501	Kortner et al., 2011
References:
FREDRIKSEN, B., SÆVAREID, K., MCAULEY, L., LANE, M., BØGWALD, J. & DALMO, R. 2011. Early immune responses in Atlantic salmon (Salmo salar L.) after immunization with PLGA nanoparticles loaded with a model antigen and β-glucan. Vaccine, 29, 8338-8349.
HAMRE, K., SISSENER, N. H., LOCK, E., OLSVIK, P. A., ESPE, M., TORSTENSEN, B. E., SILVA, J., JOHANSEN, J., WAAGBØ, R. & HEMRE, G. 2016. Antioxidant nutrition in Atlantic salmon (Salmo salar) parr and post-smolt, fed diets with high inclusion of plant ingredients and graded levels of micronutrients and selected amino acids. PeerJ, 4, e2688.
KORTNER, T. M., GU, J., KROGDAHL, Å. & BAKKE, A. M. 2013. Transcriptional regulation of cholesterol and bile acid metabolism after dietary soyabean meal treatment in Atlantic salmon (Salmo salar L.). British Journal of Nutrition, 109, 593-604.
KORTNER, T. M., SKUGOR, S., PENN, M. H., MYDLAND, L. T., DJORDJEVIC, B., HILLESTAD, M., KRASNOV, A. & KROGDAHL, Å. 2012. Dietary soyasaponin supplementation to pea protein concentrate reveals nutrigenomic interactions underlying enteropathy in Atlantic salmon (Salmo salar). BMC veterinary research, 8, 1.
KORTNER, T. M., VALEN, E. C., KORTNER, H., MARJARA, I. S., KROGDAHL, Å. & BAKKE, A. M. 2011. Candidate reference genes for quantitative real-time PCR (qPCR) assays during development of a diet-related enteropathy in Atlantic salmon (Salmo salar L.) and the potential pitfalls of uncritical use of normalization software tools. Aquaculture, 318, 355-363.
LILLEENG, E., PENN, M. H., HAUGLAND, O., XU, C., BAKKE, A. M., KROGDAHL, A., LANDSVERK, T. & FROYSTAD-SAUGEN, M. K. 2009. Decreased expression of TGF-beta, GILT and T-cell markers in the early stages of soybean enteropathy in Atlantic salmon (Salmo salar L.). Fish & Shellfish Immunology, 27, 65-72.
MARJARA, I. S., CHIKWATI, E. M., VALEN, E. C., KROGDAHL, A. & BAKKE, A. M. 2012. Transcriptional regulation of IL-17A and other inflammatory markers during the development of soybean meal-induced enteropathy in the distal intestine of Atlantic salmon (Salmo salar L.). Cytokine, 60, 186-96.
SAGSTAD, A., SANDEN, M., KROGDAHL, Å., BAKKE‐MCKELLEP, A., FRØYSTAD, M. & HEMRE, G. I. 2008. Organs development, gene expression and health of Atlantic salmon (Salmo salar L.) fed genetically modified soybeans compared to the near‐isogenic non‐modified parental line. Aquaculture Nutrition, 14, 556-572.
SAHLMANN, C., SUTHERLAND, B. J., KORTNER, T. M., KOOP, B. F., KROGDAHL, A. & BAKKE, A. M. 2013. Early response of gene expression in the distal intestine of Atlantic salmon (Salmo salar L.) during the development of soybean meal induced enteritis. Fish Shellfish Immunol, 34, 599-609.
TIPSMARK, C. K., SORENSEN, K. J., HULGARD, K. & MADSEN, S. S. 2010. Claudin-15 and -25b expression in the intestinal tract of Atlantic salmon in response to seawater acclimation, smoltification and hormone treatment. Comp Biochem Physiol A Mol Integr Physiol, 155, 361-70.
HU, H., KORTNER, T.M., GAJARDO, K., CHIKWATI, E., TINSLEY, J., KROHDAHL, A. 2016. Intestinal Fluid Permeability in Atlantic Salmon (Salmo salar L.) Is Affected by Dietary Protein Source. PLoS One. 11, e0167515.
SAHLMANN, C.; SUTHERLAND, B. J. G.; KORTNER, T. M.; KOOP, B. F.; KROGDAH, Å.; BAKKE, A. M 2013. Early response of gene expression in the distal intestine of Atlantic salmon (Salmo salar L.) during the development of soybean meal induced enteritis. Fish Shellfish Immun. 34, 599−609.
LI, Y., KORTNER, T. M., CHIKWATI, E. M., MUNANGANDU, H. M., LOCK, E. J., & KROGDAHL, Å. 2019. Gut health and vaccination response in pre-smolt Atlantic salmon (Salmo salar) fed black soldier fly (Hermetia illucens) larvae meal. Fish & shellfish immunology, 86, 1106-1113.
