# Supplementary material for: Exploring gut microbiota in adult Atlantic salmon (Salmo salar L.): Associations with gut health and dietary prebiotics
Source: Anim Microbiome. 2023 Oct 3;5:47. doi: 10.1186/s42523-023-00269-1 (PMC10548677; doi:10.1186/s42523-023-00269-1)
Supplement: Supplementary file 7 — Supplementary Material 7 [file 42523_2023_269_MOESM7_ESM.xlsx]

## Sheet: Ark1
Table S6: The sample metadata of interest for multivariate association analysis
SampleID	Time	Diet	Sea cage	Batch	Plasma_nutrients				qPCR_Immune fucntions											qPCR_Barrier fcuntions								Alpha_Diversity
					Plasma_Cholesterol	Plasma_Triglyceride	Plasma_Free_fatty_acid	Plasma_Glucose	qPCR_il1b	qPCR_il8	qPCR_ifnr	qPCR_tgfb	qPCR_il10	qPCR_cd3	qPCR_cd4a	qPCR_cd8b	qPCR_myd88	qPCR_gilt	qPCR_immune_function (PC1 of PCA)	qPCR_muc13	qPCR_muc2	qPCR_claudin15	qPCR_claudin_25b	qPCR_occludin	qPCR_zo_1	qPCR_ecad	qPCR_barrier_function (PC1 of PCA)	Observed_species_index	Shannon_index	Evenness_index	Alpha_diversity (PC1 of PCA)
538	Jan	Ref	1	1	7.6	2.4	0.8	5.3	0.029	0.014	0.026	0.076	0.067	0.143	0.018	0.338	1.03	17.936	-2.01624	10.762	19.151	4.556	1.431	0.057	1.341	4.828	1.14317	422	6.71	0.769	-1.10156
539	Jan	Ref	1	2	8.4	2.7	0.5	6.6	0.032	0.011	0.034	0.082	0.062	0.144	0.017	0.265	1.384	11.513	-2.17061	14.098	42.573	4.758	1.779	0.09	1.437	6.696	-1.06633	477	6.885	0.774	-1.38846
544	Jan	Test	2	1	4.1	2	0.5	8.7	0.065	0.006	0.046	0.082	0.069	0.197	0.017	0.28	0.999	12.492	-2.38131	12.541	27.537	4.216	1.648	0.044	1.225	5.674	0.701859	377	6.582	0.769	-0.882977
545	Jan	Test	2	2	5.1	1.7	0.5	4.7	0.037	0.011	0.014	0.093	0.061	0.212	0.026	0.426	1.161	28.081	-0.573018	17.11	16.766	6.045	1.302	0.094	2.034	6.394	-1.26709	507	6.861	0.764	-1.4729
549	Jan	Ref	3	3	8.5	2	0.5	11.9	0.035	0.01	0.034	0.063	0.063	0.153	0.012	0.272	1.125	22.568	-2.22333	11.343	25.94	6.067	1.57	0.066	1.355	5.296	0.148581	468	6.933	0.782	-1.38959
550	Jan	Ref	3	4	6.3	2.2	0.5	11	0.027	0.006	0.032	0.075	0.048	0.125	0.014	0.205	0.922	10.31	-4.25416	8.525	25.055	3.449	1.509	0.046	1.115	4.596	1.8805	257	6.364	0.795	-0.410862
551	Jan	Ref	3	5	6.1	1.6	0.4	8.6	0.027	0.006	0.024	0.084	0.043	0.195	0.017	0.245	1.117	17.884	-2.69199	10.788	31.922	4.121	1.416	0.061	1.264	5.184	0.877059	268	6.433	0.798	-0.484162
555	Jan	Test	4	3	7	2.4	0.6	6.4	0.033	0.01	0.083	0.087	0.082	0.196	0.01	0.233	1.238	22.19	-1.27613	9.116	32.615	3.224	1.592	0.068	1.209	5.05	1.17906	503	6.847	0.763	-1.44985
556	Jan	Test	4	4	8.1	2.6	0.3	7.8	0.117	0.007	0.024	0.081	0.042	0.139	0.02	0.201	1.05	6.279	-3.51615	6.003	17.525	2.746	1.216	0.07	1.199	4.452	2.46365	436	6.775	0.773	-1.18848
557	Jan	Test	4	5	8.9	2.3	0.4	9.7	0.028	0.01	0.033	0.092	0.072	0.211	0.014	0.383	1.089	19.123	-1.24118	8.511	18.688	3.746	1.277	0.078	1.355	5.041	1.44933	308	6.507	0.787	-0.635336
561	Jan	Ref	5	6	8.6	1.4	0.6	4.9	0.074	0.01	0.036	0.078	0.102	0.161	0.019	0.34	1.131	19.98	-1.14775	9.971	11.575	2.833	1.022	0.056	1.332	4.719	2.25363	399	6.716	0.777	-1.03403
562	Jan	Ref	5	7	7	1	0.3	7.5	0.03	0.009	0.034	0.076	0.069	0.182	0.014	0.408	1.16	15.973	-1.76995	9.248	34.461	3.489	1.658	0.059	1.434	5.708	0.718556	490	6.822	0.763	-1.39032
563	Jan	Ref	5	8	6.2	1.5	0.6	7.1	0.058	0.014	0.028	0.065	0.096	0.131	0.01	0.247	1.395	15.369	-1.62919	10.087	20.557	3.775	1.632	0.079	1.565	6.224	0.459137	427	6.756	0.773	-1.14676
567	Jan	Test	6	6	7.3	3.6	0.6	6.7	0.027	0.008	0.05	0.073	0.074	0.187	0.011	0.216	1.29	23.768	-1.82365	13.377	33.412	4.408	1.854	0.064	1.449	6.004	-0.256051	403	6.549	0.757	-0.943042
568	Jan	Test	6	7	8.4	2	0.5	7	0.035	0.015	0.076	0.106	0.067	0.209	0.012	0.288	1.332	24.739	-0.32582	13.455	35.721	4.654	1.616	0.086	1.507	5.601	-0.416125	462	6.604	0.746	-1.16446
569	Jan	Test	6	8	7.9	2.3	0.4	7.3	0.097	0.011	0.042	0.079	0.056	0.185	0.015	0.372	1.173	24.967	-0.8775	11.296	31.233	4.055	1.553	0.075	1.517	5.765	0.225444	401	6.564	0.759	-0.945229
738	Apr	Ref	1	1	6.3	7.7	1.1	6.6	0.028	0.009	0.053	0.119	0.06	0.238	0.022	0.51	1.449	27.907	0.132104	7.071	17.189	3.937	1.251	0.039	1.591	3.968	2.08869	461	6.814	0.77	-1.29174
739	Apr	Ref	1	2	7.3	4.5	0.7	6.3	0.039	0.011	0.025	0.114	0.049	0.17	0.013	0.372	1.145	24.186	-1.0611	6.571	12.771	2.282	1.219	0.066	1.432	4.256	2.5289	542	7.032	0.774	-1.69276
744	Apr	Test	2	1	7.6	4.9	1.1	6.2	0.086	0.008	0.024	0.109	0.049	0.143	0.013	0.248	1.173	29.416	-1.38442	5.584	17.209	1.867	0.903	0.049	1.236	3.541	3.41241	303	2.646	0.321	1.86826
745	Apr	Test	2	2	5.3	2.9	0.5	5.2	0.104	0.011	0.044	0.104	0.067	0.159	0.016	0.284	1.171	33.673	-0.445133	7.33	10.081	4.467	1.279	0.085	1.751	5.117	1.14001	235	1.873	0.238	2.60829
749	Apr	Ref	3	3	6.4	2.9	0.8	5	0.062	0.007	0.019	0.091	0.056	0.124	0.01	0.339	1.172	33.584	-1.52236	6.772	10.594	2.785	0.845	0.07	1.617	4.446	2.42813	379	6.865	0.801	-1.06691
752	Apr	Ref	3	4	7.7	4.3	1.1	3.8	0.038	0.009	0.047	0.151	0.078	0.189	0.011	0.351	1.197	20.492	-0.512918	6.501	8.021	2.481	1.11	0.056	1.44	4.149	2.81208	475	6.388	0.718	-1.07204
753	Apr	Ref	3	5	6.8	4.7	1	4.9	0.078	0.008	0.026	0.125	0.057	0.173	0.012	0.461	1.245	30.737	-0.217494	6.221	13.026	2.906	0.946	0.057	1.118	3.996	3.03739	241	6.226	0.787	-0.282597
755	Apr	Test	4	3	6.3	3	0.8	4.6	0.015	0.007	0.015	0.099	0.044	0.185	0.009	0.506	0.925	26.441	-1.9908	5.583	10.003	3.308	0.884	0.066	1.645	3.892	2.55792	566	7.173	0.784	-1.85958
756	Apr	Test	4	4	6.9	2	0.6	7	0.024	0.008	0.028	0.115	0.061	0.227	0.015	0.649	1.054	28.975	-0.444262	7.339	10.949	3.731	1.334	0.125	1.958	4.919	0.704371	50	0.472	0.084	4.20659
757	Apr	Test	4	5	7.9	4	0.8	4.8	0.03	0.009	0.05	0.111	0.06	0.175	0.014	0.336	1.163	33.38	-0.855191	5.986	6.672	3.949	1.116	0.063	1.891	3.867	2.06418	259	4.538	0.566	0.780084
761	Apr	Ref	5	6	8.7	5.1	1.2	6.4	0.117	0.009	0.042	0.106	0.053	0.175	0.015	0.399	1.247	16.708	-0.94455	5.925	12.749	2.637	1.268	0.075	1.731	4.455	2.04115	566	7.144	0.781	-1.84234
762	Apr	Ref	5	7	9	5.3	1	8.7	0.013	0.006	0.058	0.115	0.064	0.204	0.018	0.571	1.23	32.167	-0.733421	7.306	13.541	3.172	0.937	0.091	1.854	4.861	1.5637	501	6.503	0.725	-1.23053
764	Apr	Ref	5	8	7.6	3.4	0.4	4.4	0.109	0.014	0.033	0.115	0.053	0.125	0.011	0.272	1.427	33.526	-0.293841	7.457	13.361	3.926	1.838	0.069	1.873	5.953	0.641761	603	6.765	0.732	-1.7373
768	Apr	Test	6	6	6	1.8	0.7	5.3	0.02	0.006	0.062	0.11	0.145	0.18	0.01	0.456	1.115	21.69	-0.928754	4.817	7.434	2.885	1.14	0.057	1.688	4.063	2.66086	417	7.386	0.849	-1.51191
771	Apr	Test	6	7	5.2	1.9	1.9	6.6	0.096	0.013	0.03	0.179	0.087	0.177	0.013	0.522	1.287	31.798	1.28692	6.852	10.503	2.628	1.115	0.085	1.792	5.15	1.76942	457	7.385	0.836	-1.63479
772	Apr	Test	6	8	4.9	2.4	0.9	5	0.119	0.014	0.065	0.177	0.151	0.247	0.011	0.596	1.473	34.417	2.74079	7.558	10.255	3.277	1.651	0.074	2.205	5.131	0.87085	456	6.919	0.783	-1.34021
841	Sep	Ref	1	1	7	3	0.3	2.3	0.175	0.019	0.026	0.135	0.113	0.318	0.019	0.875	1.779	35.888	3.6106	11.26	45.666	5.217	2.26	0.119	1.736	7.476	-2.09373	291	3.39	0.414	1.4286
842	Sep	Ref	1	2	7.9	1.2	0.2	3.4	0.058	0.01	0.053	0.126	0.075	0.295	0.025	0.47	1.759	30.706	1.42041	11.095	35.523	5.178	2.371	0.147	1.7	8.063	-2.29667	364	5.574	0.655	-0.204261
847	Sep	Test	2	1	5.8	2.2	0.4	6.7	0.204	0.023	0.023	0.216	0.136	0.307	0.018	0.447	1.881	35.004	4.04192	13.597	18.51	6.465	2.597	0.112	2.043	9.915	-3.05391	202	2.114	0.276	2.56002
848	Sep	Test	2	2	7.5	2.5	0.3	5.6	0.041	0.012	0.031	0.097	0.052	0.26	0.015	0.481	1.673	33.916	0.705016	12.901	44.915	5.145	2.135	0.162	1.726	6.495	-2.3612	438	6.631	0.756	-1.10492
852	Sep	Ref	3	3	7	1.2	0.2	5.1	0.096	0.013	0.038	0.103	0.067	0.289	0.023	0.499	2.072	32.249	1.86197	16.016	26.65	5.367	2.175	0.106	1.813	6.101	-1.69321	227	3.363	0.43	1.64742
853	Sep	Ref	3	4	6.9	3.5	0.4	8.4	0.255	0.044	0.071	0.221	0.105	0.522	0.013	0.321	1.74	33.799	4.75306	11.754	54.341	7.122	3.254	0.134	2.154	6.764	-3.9984	211	3.465	0.449	1.62687
854	Sep	Ref	3	5	5.8	2.6	0.4	5.5	0.239	0.017	0.04	0.117	0.078	0.297	0.019	0.667	2.078	33.719	3.04884	13.021	42.221	5.994	2.058	0.165	2.073	6.256	-2.78208	136	2.411	0.34	2.55326
858	Sep	Test	4	3	7.3	2.2	0.2	4.9	0.051	0.014	0.076	0.105	0.098	0.263	0.014	0.354	1.649	32.662	1.2152	9.915	38.348	4.745	2.016	0.1	1.878	7.912	-1.47799	196	2.792	0.367	2.12195
859	Sep	Test	4	4	8.7	2.5	0.2	5	0.235	0.009	0.058	0.108	0.09	0.288	0.011	0.752	1.453	26.942	1.6809	9.983	34.562	4.691	1.821	0.109	1.654	7.496	-1.01692	86	2.718	0.423	2.42574
860	Sep	Test	4	5	7.2	1.7	0.2	4.8	0.258	0.017	0.014	0.077	0.036	0.203	0.016	0.355	1.946	32.237	0.752189	12.506	47.674	5.462	2.268	0.113	2.191	9.145	-3.13498	170	2.742	0.37	2.23252
864	Sep	Ref	5	6	7.8	1.8	0.1	4.7	0.214	0.015	0.051	0.151	0.102	0.277	0.016	0.553	2.065	28.028	2.96013	8.901	51.71	7.63	2.224	0.113	1.93	7.931	-2.86819	134	2.887	0.409	2.22239
865	Sep	Ref	5	7	7.2	1.8	0.2	5.1	0.043	0.012	0.03	0.107	0.068	0.282	0.014	0.617	1.782	24.822	1.12353	12.276	49.117	5.711	2.064	0.133	1.861	8.213	-2.7485	258	3.612	0.451	1.38889
866	Sep	Ref	5	8	9	2	0.2	3.6	0.082	0.021	0.028	0.115	0.101	0.335	0.022	0.8	1.896	36.247	3.23663	10.929	28.142	6.457	1.925	0.096	1.939	7.402	-1.6238	263	2.148	0.267	2.33128
870	Sep	Test	6	6	7.7	1.4	0.2	1.2	0.067	0.018	0.024	0.132	0.097	0.231	0.019	0.894	1.792	30.051	2.43774	13.447	49.599	7.064	2.977	0.159	2.176	9.2	-4.75017	270	3.295	0.408	1.55823
871	Sep	Test	6	7	7	1.7	0.1	1.1	0.226	0.024	0.025	0.101	0.128	0.301	0.022	0.382	1.874	31.86	2.84028	14.162	46.865	7.617	3.133	0.186	2.505	6.652	-4.98801	181	3.092	0.412	1.96408
872	Sep	Test	6	8	8.2	3.5	0.3	2.8	0.221	0.033	0.02	0.091	0.037	0.222	0.023	0.268	1.763	37.95	1.404	14.07	35.26	4.623	1.961	0.118	1.76	8.13	-1.92839	393	6.095	0.707	-0.624581
